# Supplementary material for: Genome-Wide Characterization of Serine/Arginine-Rich Gene Family and Its Genetic Effects on Agronomic Traits of Brassica napus
Source: Front Plant Sci. 2022 Feb 16;13:829668. doi: 10.3389/fpls.2022.829668 (PMC8889041; doi:10.3389/fpls.2022.829668)
Supplement: Supplementary file 9 [file Table_4.xlsx]

## Sheet: Table S4
Table S4 The KEGG enrichment results
ID	Description	GeneRatio	BgRatio	pvalue	p.adjust	qvalue	geneID	Count
ko03018	RNA degradation	286/8660	463/33115	4e-59	4.56e-57	3.79e-57	BnaA01g03050D/BnaA01g09040D/BnaA01g19310D/BnaA01g29600D/BnaA01g36820D/BnaA01g35820D/BnaA02g01720D/BnaA02g04020D/BnaA02g04030D/BnaA02g05510D/BnaA02g06900D/BnaA02g12240D/BnaA02g15520D/BnaA02g15600D/BnaA02g17350D/BnaA02g17780D/BnaA02g19410D/BnaA02g27360D/BnaA02g30460D/BnaA02g36460D/BnaA02g36470D/BnaA03g03170D/BnaA03g04110D/BnaA03g06960D/BnaA03g06980D/BnaA03g08430D/BnaA03g09310D/BnaA03g15330D/BnaA03g…	286
ko03008	Ribosome biogenesis in eukaryotes	233/8660	359/33115	6.27e-54	3.57e-52	2.97e-52	BnaA01g12190D/BnaA01g14860D/BnaA01g16980D/BnaA01g17590D/BnaA01g17600D/BnaA01g18480D/BnaA01g19000D/BnaA01g21040D/BnaA01g30310D/BnaA01g32490D/BnaA01g33870D/BnaA02g00910D/BnaA02g02770D/BnaA02g03360D/BnaA02g04000D/BnaA02g09190D/BnaA02g10840D/BnaA02g17350D/BnaA02g21230D/BnaA02g21770D/BnaA02g29790D/BnaA02g36530D/BnaA03g01910D/BnaA03g02380D/BnaA03g04430D/BnaA03g05630D/BnaA03g06340D/BnaA03g06930D/BnaA03g…	233
ko03020	RNA polymerase	109/8660	161/33115	2.52e-28	9.59e-27	7.97e-27	BnaA01g01750D/BnaA01g11530D/BnaA01g17530D/BnaA01g36190D/BnaA01g37360D/BnaA02g00250D/BnaA02g06560D/BnaA02g07250D/BnaA02g27230D/BnaA02g30930D/BnaA03g07780D/BnaA03g09670D/BnaA03g09990D/BnaA03g36610D/BnaA03g44840D/BnaA03g50300D/BnaA04g02280D/BnaA04g04070D/BnaA04g23840D/BnaA05g14200D/BnaA05g16440D/BnaA05g17270D/BnaA06g00770D/BnaA06g07130D/BnaA06g29470D/BnaA07g01690D/BnaA07g04260D/BnaA07g07550D/BnaA07g…	109
ko03051	Proteasome	173/8660	406/33115	3.63e-13	1.03e-11	8.6e-12	BnaA01g00190D/BnaA01g05950D/BnaA01g07860D/BnaA01g13780D/BnaA01g13790D/BnaA01g30490D/BnaA02g00030D/BnaA02g00050D/BnaA02g04630D/BnaA02g17220D/BnaA02g23310D/BnaA02g23370D/BnaA03g01760D/BnaA03g07840D/BnaA03g27960D/BnaA03g32320D/BnaA03g32770D/BnaA03g38250D/BnaA03g39320D/BnaA03g39340D/BnaA03g39350D/BnaA03g39360D/BnaA03g41260D/BnaA03g46660D/BnaA03g51390D/BnaA03g55950D/BnaA03g58880D/BnaA03g59360D/BnaA04g…	173
ko04712	Circadian rhythm - plant	77/8660	146/33115	7.04e-12	1.6e-10	1.33e-10	BnaA01g19000D/BnaA01g21040D/BnaA02g00920D/BnaA02g06500D/BnaA02g12130D/BnaA02g32550D/BnaA04g13490D/BnaA04g15260D/BnaA04g19100D/BnaA04g19110D/BnaA04g26750D/BnaA05g01090D/BnaA05g22650D/BnaA05g34990D/BnaA06g07950D/BnaA06g26980D/BnaA07g25310D/BnaA07g33120D/BnaA08g27870D/BnaA09g04840D/BnaA09g36010D/BnaA09g38340D/BnaA09g40710D/BnaA09g42220D/BnaA10g00780D/BnaA10g02550D/BnaA10g12930D/BnaA10g18430D/BnaA10g…	77
ko01053	Biosynthesis of siderophore group nonribosomal peptides	16/8660	16/33115	4.74e-10	9e-09	7.48e-09	BnaA06g08060D/BnaA06g13060D/BnaA07g22090D/BnaA08g22340D/BnaC02g40220D/BnaC05g14570D/BnaC05g19790D/BnaC06g04430D/BnaC06g22820D/BnaC06g35540D/BnaC07g12250D/BnaC08g18420D/BnaC08g37000D/BnaC08g48240D/BnaCnng23220D/BnaCnng08300D	16
ko00471	D-Glutamine and D-glutamate metabolism	15/8660	15/33115	1.81e-09	2.95e-08	2.45e-08	BnaA01g33880D/BnaA03g02040D/BnaA05g37230D/BnaA10g16660D/BnaA10g23880D/BnaAnng13720D/BnaC01g40390D/BnaC02g01610D/BnaC03g03050D/BnaC05g31580D/BnaC05g47630D/BnaC05g47670D/BnaC09g03800D/BnaC09g39680D/BnaC09g47860D	15
ko00010	Glycolysis / Gluconeogenesis	177/8660	470/33115	2.36e-08	3.37e-07	2.8e-07	BnaA01g00210D/BnaA01g20680D/BnaA01g22040D/BnaA01g24280D/BnaA01g27130D/BnaA01g33660D/BnaA01g37400D/BnaA01g37380D/BnaA02g11520D/BnaA03g02560D/BnaA03g05250D/BnaA03g10910D/BnaA03g13490D/BnaA03g16750D/BnaA03g27550D/BnaA03g28460D/BnaA03g28480D/BnaA03g33170D/BnaA03g36910D/BnaA03g50730D/BnaA03g52820D/BnaA03g54330D/BnaA03g54560D/BnaA04g05070D/BnaA04g05600D/BnaA04g05610D/BnaA04g06960D/BnaA05g07770D/BnaA05g…	177
ko00230	Purine metabolism	137/8660	348/33115	4.28e-08	5.43e-07	4.51e-07	BnaA01g20680D/BnaA01g24280D/BnaA01g37400D/BnaA02g28570D/BnaA03g00830D/BnaA03g02560D/BnaA03g10910D/BnaA03g27160D/BnaA03g28460D/BnaA03g36860D/BnaA03g36910D/BnaA03g40710D/BnaA03g52820D/BnaA04g02300D/BnaA04g05070D/BnaA04g06960D/BnaA04g20480D/BnaA04g29080D/BnaA04g29090D/BnaA05g08860D/BnaA05g16830D/BnaA05g22660D/BnaA05g31080D/BnaA05g35800D/BnaA05g37390D/BnaA06g05760D/BnaA06g10940D/BnaA06g22820D/BnaA06g…	137
ko00620	Pyruvate metabolism	132/8660	344/33115	4.09e-07	4.66e-06	3.88e-06	BnaA01g00210D/BnaA01g20680D/BnaA01g22040D/BnaA01g24280D/BnaA01g37400D/BnaA02g11520D/BnaA03g02560D/BnaA03g10910D/BnaA03g13490D/BnaA03g28460D/BnaA03g33170D/BnaA03g36910D/BnaA03g50730D/BnaA03g52820D/BnaA03g54330D/BnaA03g54560D/BnaA04g05070D/BnaA04g05600D/BnaA04g05610D/BnaA04g06960D/BnaA05g25500D/BnaA05g33410D/BnaA05g35800D/BnaA05g37390D/BnaA06g00560D/BnaA06g16950D/BnaA06g20750D/BnaA06g22820D/BnaA06g…	132
ko02044	Secretion system	69/8660	160/33115	2.35e-06	2.43e-05	2.02e-05	BnaA01g06530D/BnaA01g11090D/BnaA01g25490D/BnaA02g20080D/BnaA02g33100D/BnaA03g20980D/BnaA03g26540D/BnaA03g35990D/BnaA03g48140D/BnaA03g50330D/BnaA04g26040D/BnaA04g26420D/BnaA05g04540D/BnaA05g05110D/BnaA05g17060D/BnaA05g19980D/BnaA06g03460D/BnaA06g09990D/BnaA06g21420D/BnaA07g19730D/BnaA07g24920D/BnaA07g24930D/BnaA07g26580D/BnaA08g02940D/BnaA08g02950D/BnaA08g03500D/BnaA08g04310D/BnaA08g21240D/BnaA10g…	69
ko99974	Translation	23/8660	42/33115	7.65e-05	0.00072691	0.00060408	BnaA01g15060D/BnaA03g31160D/BnaA03g35650D/BnaA03g47670D/BnaA04g17020D/BnaA05g18810D/BnaA05g18830D/BnaA06g37770D/BnaA08g26610D/BnaC01g17790D/BnaC01g32670D/BnaC01g32710D/BnaC03g36490D/BnaC03g41490D/BnaC04g40330D/BnaC05g06640D/BnaC05g31840D/BnaC05g42750D/BnaC05g42760D/BnaC05g51720D/BnaC07g39950D/BnaCnng06600D/BnaCnng06610D	23
ko02010	ABC transporters	46/8660	108/33115	0.000150519	0.00131994	0.0010969	BnaA02g29470D/BnaA03g16880D/BnaA03g43560D/BnaA04g21150D/BnaA04g26870D/BnaA05g00840D/BnaA05g17490D/BnaA06g03880D/BnaA06g31250D/BnaA07g03040D/BnaA07g19210D/BnaA07g23780D/BnaA07g38050D/BnaA08g27160D/BnaA08g30900D/BnaA09g02390D/BnaA09g18050D/BnaA09g40060D/BnaA10g01190D/BnaC02g37560D/BnaC02g37570D/BnaC03g20400D/BnaC03g75700D/BnaC04g00490D/BnaC04g51510D/BnaC05g01280D/BnaC05g25600D/BnaC05g35280D/BnaC06g…	46
ko01007	Amino acid related enzymes	145/8660	445/33115	0.00138067	0.0112426	0.00934287	BnaA01g04910D/BnaA01g15450D/BnaA01g15800D/BnaA01g20890D/BnaA02g04300D/BnaA02g12300D/BnaA02g31180D/BnaA02g31710D/BnaA03g03400D/BnaA03g25380D/BnaA03g25410D/BnaA03g31900D/BnaA03g32860D/BnaA03g35400D/BnaA03g47930D/BnaA03g51770D/BnaA03g51850D/BnaA03g54610D/BnaA03g56470D/BnaA04g06620D/BnaA04g28670D/BnaA05g11710D/BnaA05g20880D/BnaA05g25590D/BnaA05g25810D/BnaA05g27370D/BnaA05g36800D/BnaA06g15650D/BnaA06g…	145
ko00250	Alanine, aspartate and glutamate metabolism	82/8660	238/33115	0.00271001	0.0205961	0.0171159	BnaA01g04910D/BnaA01g14190D/BnaA01g26440D/BnaA01g33880D/BnaA02g04300D/BnaA02g14400D/BnaA02g36110D/BnaA03g02040D/BnaA03g02840D/BnaA03g03400D/BnaA03g46970D/BnaA03g51850D/BnaA03g54610D/BnaA04g02300D/BnaA04g05900D/BnaA04g28670D/BnaA05g11710D/BnaA05g37230D/BnaA06g02140D/BnaA06g17510D/BnaA06g20540D/BnaA06g23950D/BnaA07g17380D/BnaA07g28110D/BnaA07g34930D/BnaA08g01810D/BnaA09g10660D/BnaA09g12700D/BnaA09g…	82
ko00290	Valine, leucine and isoleucine biosynthesis	40/8660	103/33115	0.00322045	0.0229457	0.0190684	BnaA01g20890D/BnaA01g23200D/BnaA02g12300D/BnaA03g20030D/BnaA03g35400D/BnaA05g36800D/BnaA05g34440D/BnaA06g15650D/BnaA06g37960D/BnaA06g37970D/BnaA07g05810D/BnaA08g02280D/BnaA08g02290D/BnaA08g26000D/BnaA08g26010D/BnaAnng36960D/BnaAnng29280D/BnaC01g30200D/BnaC02g28410D/BnaC03g24020D/BnaC03g41100D/BnaC03g41160D/BnaC03g68440D/BnaC03g68450D/BnaC03g68460D/BnaC04g52960D/BnaC05g07800D/BnaC05g07810D/BnaC05g…	40
ko00280	Valine, leucine and isoleucine degradation	65/8660	185/33115	0.00421061	0.0282359	0.0234647	BnaA01g20890D/BnaA02g12300D/BnaA02g30470D/BnaA03g15290D/BnaA03g35400D/BnaA03g50730D/BnaA03g50840D/BnaA04g19180D/BnaA05g10480D/BnaA05g36800D/BnaA06g15650D/BnaA06g16950D/BnaA06g20750D/BnaA06g38800D/BnaA06g37960D/BnaA06g37970D/BnaA08g00430D/BnaA08g02280D/BnaA08g02290D/BnaA08g04430D/BnaA08g11650D/BnaA08g26000D/BnaA08g26010D/BnaA08g28040D/BnaA09g50980D/BnaA09g53800D/BnaA10g08800D/BnaA10g08810D/BnaAnng…	65
ko03060	Protein export	75/8660	222/33115	0.00685649	0.0434244	0.0360868	BnaA01g06530D/BnaA01g11090D/BnaA01g25490D/BnaA02g20080D/BnaA02g33100D/BnaA03g14210D/BnaA03g17100D/BnaA03g20980D/BnaA03g26540D/BnaA03g35990D/BnaA03g48140D/BnaA03g50330D/BnaA04g26040D/BnaA04g26420D/BnaA05g04540D/BnaA05g05110D/BnaA05g17060D/BnaA05g19980D/BnaA06g03460D/BnaA06g09990D/BnaA06g21420D/BnaA07g15650D/BnaA07g19730D/BnaA07g24920D/BnaA07g24930D/BnaA07g26580D/BnaA08g02940D/BnaA08g02950D/BnaA08g…	75
