# Supplementary material for: Genome-Wide Characterization of Serine/Arginine-Rich Gene Family and Its Genetic Effects on Agronomic Traits of Brassica napus
Source: Front Plant Sci. 2022 Feb 16;13:829668. doi: 10.3389/fpls.2022.829668 (PMC8889041; doi:10.3389/fpls.2022.829668)
Supplement: Supplementary file 10 [file Table_5.xlsx]

## Sheet: Table S5
Table S5 The GO enrichment results
ID	Description	GeneRatio	BgRatio	pvalue	p.adjust	qvalue	geneID	Count
GO:0042254	ribosome biogenesis	366/12729	403/76374	8.88e-238	1.56e-234	9.44e-235	BnaA01g07450D/BnaA01g08080D/BnaA01g08920D/BnaA01g13120D/BnaA01g14310D/BnaA01g15390D/BnaA01g16130D/BnaA01g20630D/BnaA01g24800D/BnaA01g26980D/BnaA01g28230D/BnaA01g30640D/BnaA01g32660D/BnaA01g32880D/BnaA01g34650D/BnaA01g35810D/BnaA02g02080D/BnaA02g02090D/BnaA02g04810D/BnaA02g08440D/BnaA02g08520D/BnaA02g10390D/BnaA02g10490D/BnaA02g14450D/BnaA02g16870D/BnaA02g19870D/BnaA02g23560D/BnaA02g28660D/BnaA02g…	366
GO:0022627	cytosolic small ribosomal subunit	337/12729	357/76374	1.07e-233	9.38e-231	5.67e-231	BnaA01g02490D/BnaA01g03150D/BnaA01g05130D/BnaA01g05390D/BnaA01g07430D/BnaA01g07470D/BnaA01g08080D/BnaA01g14960D/BnaA01g20600D/BnaA01g21860D/BnaA01g25840D/BnaA01g25960D/BnaA01g32150D/BnaA01g32880D/BnaA01g33230D/BnaA01g33350D/BnaA01g33400D/BnaA01g33650D/BnaA02g00010D/BnaA02g02540D/BnaA02g02770D/BnaA02g04810D/BnaA02g06710D/BnaA02g06730D/BnaA02g07620D/BnaA02g08530D/BnaA02g15960D/BnaA02g24860D/BnaA02g…	337
GO:0000398	mRNA splicing, via spliceosome	283/12729	391/76374	1.04e-131	6.12e-129	3.7e-129	BnaA01g01130D/BnaA01g04590D/BnaA01g05880D/BnaA01g10280D/BnaA01g10630D/BnaA01g14750D/BnaA01g16060D/BnaA01g16980D/BnaA01g29940D/BnaA01g30430D/BnaA01g30860D/BnaA01g30870D/BnaA01g35820D/BnaA01g35180D/BnaA02g01670D/BnaA02g06700D/BnaA02g10140D/BnaA02g20550D/BnaA02g20890D/BnaA02g25580D/BnaA02g26750D/BnaA02g33340D/BnaA03g04360D/BnaA03g12870D/BnaA03g13200D/BnaA03g13610D/BnaA03g20220D/BnaA03g21510D/BnaA03g…	283
GO:0006606	protein import into nucleus	252/12729	402/76374	2.11e-95	9.3e-93	5.62e-93	BnaA01g02290D/BnaA01g04230D/BnaA01g06210D/BnaA01g15720D/BnaA01g16980D/BnaA01g17690D/BnaA01g18280D/BnaA01g18480D/BnaA01g19300D/BnaA01g24550D/BnaA01g30860D/BnaA01g30870D/BnaA01g35820D/BnaA01g34740D/BnaA02g02810D/BnaA02g05570D/BnaA02g09190D/BnaA02g11420D/BnaA02g16040D/BnaA02g20480D/BnaA02g30700D/BnaA02g36530D/BnaA03g04950D/BnaA03g05660D/BnaA03g08480D/BnaA03g13280D/BnaA03g15800D/BnaA03g17540D/BnaA03g…	252
GO:0005840	ribosome	230/12729	367/76374	3.84e-87	1.35e-84	8.16e-85	BnaA01g06210D/BnaA01g12190D/BnaA01g27990D/BnaA01g28980D/BnaA01g34650D/BnaA01g35290D/BnaA02g00470D/BnaA02g02080D/BnaA02g02550D/BnaA02g08440D/BnaA02g10490D/BnaA02g18970D/BnaA02g20180D/BnaA02g21230D/BnaA02g28030D/BnaA02g28660D/BnaA02g31300D/BnaA02g34970D/BnaA03g02380D/BnaA03g02870D/BnaA03g03540D/BnaA03g05310D/BnaA03g07060D/BnaA03g07960D/BnaA03g15750D/BnaA03g16530D/BnaA03g18630D/BnaA03g19990D/BnaA03g…	230
GO:0003743	translation initiation factor activity	213/12729	363/76374	3.02e-73	8.86e-71	5.35e-71	BnaA01g03050D/BnaA01g03600D/BnaA01g06390D/BnaA01g08910D/BnaA01g16170D/BnaA01g19310D/BnaA01g29770D/BnaA01g30860D/BnaA01g30870D/BnaA01g32370D/BnaA02g03970D/BnaA02g05130D/BnaA02g08040D/BnaA02g11620D/BnaA02g15520D/BnaA02g17270D/BnaA02g17730D/BnaA02g21720D/BnaA02g28950D/BnaA02g29110D/BnaA02g36570D/BnaA03g00110D/BnaA03g04430D/BnaA03g06890D/BnaA03g19010D/BnaA03g19530D/BnaA03g24760D/BnaA03g31150D/BnaA03g…	213
GO:0006414	translational elongation	146/12729	200/76374	2.25e-69	5.65e-67	3.41e-67	BnaA01g17590D/BnaA01g17600D/BnaA01g33350D/BnaA02g00620D/BnaA02g04260D/BnaA02g06370D/BnaA02g06400D/BnaA02g08230D/BnaA02g29320D/BnaA02g29450D/BnaA02g31260D/BnaA02g31570D/BnaA02g31580D/BnaA02g33860D/BnaA03g01450D/BnaA03g03040D/BnaA03g07610D/BnaA03g08070D/BnaA03g08920D/BnaA03g22290D/BnaA03g25920D/BnaA03g26700D/BnaA03g28860D/BnaA03g30850D/BnaA03g36930D/BnaA03g56530D/BnaA04g15980D/BnaA04g20940D/BnaA04g…	146
GO:0034219	carbohydrate transmembrane transport	184/12729	309/76374	7.03e-65	1.55e-62	9.34e-63	BnaA01g01140D/BnaA01g02100D/BnaA01g11330D/BnaA01g19370D/BnaA01g19420D/BnaA01g19430D/BnaA01g21370D/BnaA01g26430D/BnaA01g33330D/BnaA01g33340D/BnaA01g36640D/BnaA01g36650D/BnaA01g36660D/BnaA01g36670D/BnaA01g36680D/BnaA02g03350D/BnaA02g21050D/BnaA02g31070D/BnaA02g31080D/BnaA02g31100D/BnaA02g31110D/BnaA02g35880D/BnaA03g05850D/BnaA03g25570D/BnaA03g26380D/BnaA03g28200D/BnaA03g29290D/BnaA03g29310D/BnaA03g…	184
GO:0004707	MAP kinase activity	86/12729	89/76374	6.27e-63	1.23e-60	7.4e-61	BnaA01g08270D/BnaA01g20840D/BnaA01g21880D/BnaA01g29230D/BnaA02g21110D/BnaA02g26910D/BnaA03g19910D/BnaA03g20470D/BnaA03g26950D/BnaA04g01520D/BnaA04g01530D/BnaA04g26650D/BnaA05g03140D/BnaA05g03550D/BnaA05g05340D/BnaA05g14400D/BnaA05g22170D/BnaA05g24830D/BnaA06g00890D/BnaA06g06010D/BnaA06g12330D/BnaA06g18440D/BnaA06g34930D/BnaA07g01930D/BnaA07g18530D/BnaA07g22180D/BnaA07g22580D/BnaA08g03710D/BnaA08g…	86
GO:0006406	mRNA export from nucleus	164/12729	269/76374	4.77e-60	8.4e-58	5.07e-58	BnaA01g04030D/BnaA01g04230D/BnaA01g16980D/BnaA01g18280D/BnaA01g18480D/BnaA01g35820D/BnaA01g34740D/BnaA02g00210D/BnaA02g00920D/BnaA02g01670D/BnaA02g02810D/BnaA02g09190D/BnaA02g16040D/BnaA02g30530D/BnaA02g36530D/BnaA03g01920D/BnaA03g04360D/BnaA03g05660D/BnaA03g14650D/BnaA03g15800D/BnaA03g17540D/BnaA03g18380D/BnaA03g18390D/BnaA03g51290D/BnaA03g57210D/BnaA04g02280D/BnaA04g02470D/BnaA04g12350D/BnaA04g…	164
GO:0000085	mitotic G2 phase	177/12729	312/76374	4.75e-58	7.61e-56	4.6e-56	BnaA01g04030D/BnaA01g14860D/BnaA01g18280D/BnaA01g19300D/BnaA01g25680D/BnaA01g33840D/BnaA01g35820D/BnaA01g34740D/BnaA02g05130D/BnaA02g05570D/BnaA02g11420D/BnaA02g33340D/BnaA03g01920D/BnaA03g07120D/BnaA03g08480D/BnaA03g13280D/BnaA03g17540D/BnaA03g27830D/BnaA03g28450D/BnaA03g30090D/BnaA03g31900D/BnaA03g35570D/BnaA03g41480D/BnaA03g47570D/BnaA04g19370D/BnaA04g21760D/BnaA04g25980D/BnaA04g26230D/BnaA05g…	177
GO:0005732	small nucleolar ribonucleoprotein complex	84/12729	90/76374	7.31e-58	1.07e-55	6.48e-56	BnaA01g10630D/BnaA01g29600D/BnaA02g12240D/BnaA02g17780D/BnaA02g27360D/BnaA02g30460D/BnaA03g26010D/BnaA03g30090D/BnaA03g33200D/BnaA03g50010D/BnaA03g57210D/BnaA04g00350D/BnaA04g01500D/BnaA04g14000D/BnaA04g29590D/BnaA05g25370D/BnaA05g27540D/BnaA05g30020D/BnaA06g14490D/BnaA06g14980D/BnaA06g25120D/BnaA06g28600D/BnaA06g33630D/BnaA07g01560D/BnaA07g18540D/BnaA07g21230D/BnaA07g25380D/BnaA07g33080D/BnaA08g…	84
GO:0080008	Cul4-RING E3 ubiquitin ligase complex	214/12729	430/76374	1.2e-56	1.62e-54	9.81e-55	BnaA01g02820D/BnaA01g05610D/BnaA01g07120D/BnaA01g19030D/BnaA01g20690D/BnaA01g26020D/BnaA01g27690D/BnaA01g31610D/BnaA02g01670D/BnaA02g02180D/BnaA02g04590D/BnaA02g07770D/BnaA02g10660D/BnaA02g13180D/BnaA02g14290D/BnaA02g19480D/BnaA02g28950D/BnaA02g30830D/BnaA02g34810D/BnaA03g01910D/BnaA03g04360D/BnaA03g09860D/BnaA03g11830D/BnaA03g14400D/BnaA03g39850D/BnaA03g42250D/BnaA03g57210D/BnaA03g58630D/BnaA04g…	214
GO:0009165	nucleotide biosynthetic process	188/12729	358/76374	1.56e-54	1.96e-52	1.18e-52	BnaA01g00190D/BnaA01g01560D/BnaA01g06380D/BnaA01g06390D/BnaA01g06460D/BnaA01g11300D/BnaA01g14190D/BnaA01g15060D/BnaA01g15800D/BnaA02g03360D/BnaA02g04500D/BnaA02g04590D/BnaA02g05970D/BnaA02g09650D/BnaA02g14660D/BnaA02g28570D/BnaA02g31180D/BnaA02g31710D/BnaA02g36100D/BnaA02g35820D/BnaA03g02380D/BnaA03g06340D/BnaA03g07760D/BnaA03g14650D/BnaA03g19010D/BnaA03g19120D/BnaA03g31900D/BnaA03g46970D/BnaA03g…	188
GO:0005351	carbohydrate:proton symporter activity	185/12729	349/76374	1.68e-54	1.98e-52	1.19e-52	BnaA01g01140D/BnaA01g02100D/BnaA01g11330D/BnaA01g19370D/BnaA01g19420D/BnaA01g19430D/BnaA01g21370D/BnaA01g26430D/BnaA01g33330D/BnaA01g33340D/BnaA01g36650D/BnaA01g36660D/BnaA01g36670D/BnaA01g36680D/BnaA02g03350D/BnaA02g21050D/BnaA02g31070D/BnaA02g31080D/BnaA02g31100D/BnaA02g31110D/BnaA02g35880D/BnaA03g05850D/BnaA03g25570D/BnaA03g26380D/BnaA03g28200D/BnaA03g29290D/BnaA03g29310D/BnaA03g39490D/BnaA03g…	185
GO:0006396	RNA processing	225/12729	483/76374	4.34e-53	4.78e-51	2.89e-51	BnaA01g06000D/BnaA01g12740D/BnaA01g13760D/BnaA01g14120D/BnaA01g27690D/BnaA01g29380D/BnaA02g05570D/BnaA02g06560D/BnaA02g09280D/BnaA02g11420D/BnaA02g21770D/BnaA02g31010D/BnaA02g34100D/BnaA03g08480D/BnaA03g13280D/BnaA03g18500D/BnaA03g26120D/BnaA03g33420D/BnaA03g35090D/BnaA03g42250D/BnaA03g44720D/BnaA03g45660D/BnaA03g46910D/BnaA03g50010D/BnaA03g56950D/BnaA03g56510D/BnaA04g05710D/BnaA04g07990D/BnaA04g…	225
GO:0005681	spliceosomal complex	69/12729	70/76374	1.02e-52	1.06e-50	6.37e-51	BnaA01g10280D/BnaA01g14750D/BnaA01g29940D/BnaA03g02440D/BnaA03g12870D/BnaA03g21510D/BnaA03g32720D/BnaA03g37570D/BnaA03g47460D/BnaA04g18070D/BnaA04g23970D/BnaA05g02230D/BnaA05g06280D/BnaA05g06350D/BnaA05g06360D/BnaA05g16620D/BnaA05g26100D/BnaA05g35180D/BnaA06g25120D/BnaA06g37780D/BnaA07g01560D/BnaA07g33370D/BnaA07g38260D/BnaA08g27340D/BnaA08g30960D/BnaA09g20860D/BnaA09g45180D/BnaA09g50970D/BnaA10g…	69
GO:0003729	mRNA binding	91/12729	110/76374	3.8e-52	3.71e-50	2.24e-50	BnaA01g07160D/BnaA01g14790D/BnaA01g15060D/BnaA02g01720D/BnaA02g15530D/BnaA02g18810D/BnaA03g18380D/BnaA03g18390D/BnaA03g25810D/BnaA03g31160D/BnaA03g35650D/BnaA03g47500D/BnaA03g47670D/BnaA03g51330D/BnaA03g51340D/BnaA04g11900D/BnaA04g12350D/BnaA05g17060D/BnaA05g18810D/BnaA05g18830D/BnaA06g03460D/BnaA06g09990D/BnaA06g26770D/BnaA06g37780D/BnaA07g23410D/BnaA07g34010D/BnaA08g02940D/BnaA08g02950D/BnaA08g…	91
GO:0000478	endonucleolytic cleavage involved in rRNA processing	63/12729	64/76374	4.46e-48	4.13e-46	2.5e-46	BnaA01g04230D/BnaA01g12190D/BnaA01g14860D/BnaA01g30410D/BnaA01g34740D/BnaA02g00910D/BnaA02g10840D/BnaA02g21230D/BnaA03g07960D/BnaA03g17540D/BnaA03g25240D/BnaA03g32400D/BnaA03g47570D/BnaA04g07110D/BnaA04g21760D/BnaA05g06660D/BnaA05g26520D/BnaA05g29900D/BnaA05g36400D/BnaA06g03420D/BnaA06g03440D/BnaA07g02510D/BnaA08g02930D/BnaA08g31010D/BnaA09g08990D/BnaA09g20820D/BnaA09g53020D/BnaA10g07420D/BnaA10g…	63
GO:0006413	translational initiation	147/12729	261/76374	6.24e-48	5.49e-46	3.32e-46	BnaA01g08910D/BnaA01g16170D/BnaA01g19310D/BnaA01g29770D/BnaA02g03970D/BnaA02g05130D/BnaA02g08040D/BnaA02g15520D/BnaA02g17270D/BnaA02g17730D/BnaA02g22650D/BnaA02g29110D/BnaA03g00110D/BnaA03g04430D/BnaA03g06890D/BnaA03g19010D/BnaA03g19530D/BnaA03g24160D/BnaA03g31150D/BnaA03g33160D/BnaA03g37740D/BnaA03g43550D/BnaA03g48450D/BnaA03g57640D/BnaA04g00300D/BnaA04g01300D/BnaA04g03450D/BnaA04g07440D/BnaA04g…	147
GO:0006397	mRNA processing	96/12729	128/76374	7.07e-48	5.93e-46	3.58e-46	BnaA01g11490D/BnaA01g14100D/BnaA01g22250D/BnaA01g22260D/BnaA01g23100D/BnaA01g23620D/BnaA01g25900D/BnaA02g00220D/BnaA02g26520D/BnaA02g33000D/BnaA02g33010D/BnaA02g34480D/BnaA03g09940D/BnaA03g35410D/BnaA03g39560D/BnaA04g15160D/BnaA05g12710D/BnaA05g21980D/BnaA05g27100D/BnaA05g30810D/BnaA05g32250D/BnaA05g36790D/BnaA06g23390D/BnaA06g23400D/BnaA06g23890D/BnaA06g34090D/BnaA07g22500D/BnaA07g38950D/BnaA08g…	96
GO:0000741	karyogamy	113/12729	173/76374	3.31e-46	2.65e-44	1.6e-44	BnaA01g06210D/BnaA01g16980D/BnaA01g28910D/BnaA01g33430D/BnaA01g35820D/BnaA02g03360D/BnaA02g05570D/BnaA03g01910D/BnaA03g01920D/BnaA03g06340D/BnaA03g08480D/BnaA03g28750D/BnaA03g32190D/BnaA03g33880D/BnaA03g51130D/BnaA04g23970D/BnaA04g27370D/BnaA05g02230D/BnaA05g26770D/BnaA05g32360D/BnaA05g34320D/BnaA06g21880D/BnaA06g25280D/BnaA06g38640D/BnaA07g00780D/BnaA07g13920D/BnaA07g17120D/BnaA07g19890D/BnaA07g…	113
GO:0005665	RNA polymerase II, core complex	68/12729	74/76374	6.66e-46	5.09e-44	3.08e-44	BnaA01g01750D/BnaA01g11530D/BnaA01g17530D/BnaA01g36190D/BnaA02g00250D/BnaA02g07250D/BnaA03g07780D/BnaA03g09670D/BnaA03g36610D/BnaA03g44840D/BnaA03g50300D/BnaA05g14200D/BnaA05g16440D/BnaA05g17270D/BnaA06g00770D/BnaA06g07130D/BnaA07g01690D/BnaA07g04260D/BnaA08g01040D/BnaA08g09570D/BnaA08g10000D/BnaA08g25270D/BnaA09g02260D/BnaA09g08480D/BnaA09g22420D/BnaA09g37940D/BnaA10g12180D/BnaA10g22260D/BnaAnng…	68
GO:0007169	transmembrane receptor protein tyrosine kinase signaling pathway	203/12729	458/76374	6.3e-44	4.62e-42	2.79e-42	BnaA01g01430D/BnaA01g08270D/BnaA01g08380D/BnaA01g08400D/BnaA01g08410D/BnaA01g10430D/BnaA01g15650D/BnaA01g15660D/BnaA01g35050D/BnaA02g10040D/BnaA02g11580D/BnaA02g11590D/BnaA02g15930D/BnaA02g16780D/BnaA02g20100D/BnaA02g22840D/BnaA02g24450D/BnaA03g04770D/BnaA03g09490D/BnaA03g09890D/BnaA03g22870D/BnaA03g38990D/BnaA03g40550D/BnaA03g44500D/BnaA03g55690D/BnaA04g13270D/BnaA04g14170D/BnaA04g24080D/BnaA04g…	203
GO:0048443	stamen development	163/12729	326/76374	7.75e-44	5.46e-42	3.3e-42	BnaA01g01320D/BnaA01g01430D/BnaA01g08270D/BnaA01g08320D/BnaA01g08380D/BnaA01g08400D/BnaA01g08410D/BnaA02g12240D/BnaA02g15460D/BnaA02g20100D/BnaA02g29470D/BnaA03g16880D/BnaA03g18520D/BnaA03g38990D/BnaA03g40050D/BnaA03g54310D/BnaA04g00800D/BnaA04g11900D/BnaA04g13270D/BnaA04g21150D/BnaA04g23190D/BnaA05g03030D/BnaA05g25910D/BnaA06g07500D/BnaA06g08120D/BnaA06g11580D/BnaA06g12210D/BnaA06g18830D/BnaA06g…	163
GO:0019843	rRNA binding	98/12729	143/76374	4.38e-43	2.96e-41	1.79e-41	BnaA01g28230D/BnaA01g28980D/BnaA01g34100D/BnaA01g34110D/BnaA01g34120D/BnaA02g02540D/BnaA02g02770D/BnaA02g03760D/BnaA02g19870D/BnaA02g21980D/BnaA02g22240D/BnaA03g05300D/BnaA03g05630D/BnaA03g06760D/BnaA03g33780D/BnaA03g34080D/BnaA03g42470D/BnaA04g03720D/BnaA04g03740D/BnaA04g07180D/BnaA04g09660D/BnaA04g20220D/BnaA05g02780D/BnaA05g09320D/BnaA05g14980D/BnaA05g24420D/BnaA06g01640D/BnaA06g19320D/BnaA06g…	98
GO:0003746	translation elongation factor activity	99/12729	152/76374	1.66e-40	1.09e-38	6.55e-39	BnaA01g17590D/BnaA01g17600D/BnaA02g00620D/BnaA02g04260D/BnaA02g06370D/BnaA02g06400D/BnaA02g31570D/BnaA02g31580D/BnaA02g33860D/BnaA03g03040D/BnaA03g07610D/BnaA03g08920D/BnaA03g19760D/BnaA03g25920D/BnaA03g36930D/BnaA04g20940D/BnaA04g22570D/BnaA05g04510D/BnaA05g11320D/BnaA05g16740D/BnaA06g04440D/BnaA06g05540D/BnaA06g39950D/BnaA07g27940D/BnaA08g17430D/BnaA08g17480D/BnaA08g19830D/BnaA08g26240D/BnaA08g…	99
GO:0004743	pyruvate kinase activity	49/12729	49/76374	6.87e-39	4.32e-37	2.61e-37	BnaA01g20680D/BnaA01g24280D/BnaA01g37400D/BnaA03g02560D/BnaA03g10910D/BnaA03g28460D/BnaA03g36910D/BnaA03g52820D/BnaA04g05070D/BnaA05g35800D/BnaA05g37390D/BnaA06g22820D/BnaA07g15940D/BnaA09g33340D/BnaA09g36270D/BnaA09g52300D/BnaA09g52310D/BnaA10g00550D/BnaA10g06350D/BnaA10g10590D/BnaA10g22870D/BnaAnng32070D/BnaC01g25930D/BnaC01g30390D/BnaC01g31270D/BnaC02g28400D/BnaC02g42660D/BnaC02g44850D/BnaC03g…	49
GO:0006164	purine nucleotide biosynthetic process	91/12729	140/76374	3.01e-37	1.82e-35	1.1e-35	BnaA01g12190D/BnaA01g14860D/BnaA01g15450D/BnaA01g19300D/BnaA02g10840D/BnaA02g14400D/BnaA02g21230D/BnaA02g21770D/BnaA03g01450D/BnaA03g25240D/BnaA03g27160D/BnaA03g41480D/BnaA03g47570D/BnaA03g47930D/BnaA03g51290D/BnaA04g01900D/BnaA04g20480D/BnaA04g26860D/BnaA04g29080D/BnaA04g29090D/BnaA05g08860D/BnaA05g14360D/BnaA05g19730D/BnaA05g20820D/BnaA06g03080D/BnaA06g05760D/BnaA06g28960D/BnaA07g03700D/BnaA07g…	91
GO:0016607	nuclear speck	77/12729	107/76374	1.49e-36	8.51e-35	5.14e-35	BnaA01g14750D/BnaA01g25900D/BnaA02g08140D/BnaA02g20550D/BnaA03g12870D/BnaA03g17170D/BnaA03g21510D/BnaA03g35410D/BnaA03g47460D/BnaA03g51620D/BnaA04g03560D/BnaA04g14520D/BnaA04g23970D/BnaA05g02230D/BnaA05g13830D/BnaA05g36790D/BnaA06g00410D/BnaA06g11140D/BnaA06g22020D/BnaA06g37780D/BnaA06g39950D/BnaA07g05640D/BnaA07g05650D/BnaA07g13040D/BnaA08g00560D/BnaA08g23570D/BnaA08g28490D/BnaA08g28500D/BnaA08g…	77
GO:0030955	potassium ion binding	46/12729	46/76374	1.5e-36	8.51e-35	5.14e-35	BnaA01g20680D/BnaA01g24280D/BnaA01g37400D/BnaA03g02560D/BnaA03g10910D/BnaA03g28460D/BnaA03g36910D/BnaA03g52820D/BnaA04g05070D/BnaA05g35800D/BnaA05g37390D/BnaA06g22820D/BnaA07g15940D/BnaA09g33340D/BnaA09g36270D/BnaA09g52300D/BnaA09g52310D/BnaA10g00550D/BnaA10g06350D/BnaA10g10590D/BnaA10g22870D/BnaAnng32070D/BnaC01g25930D/BnaC01g30390D/BnaC01g31270D/BnaC02g42660D/BnaC02g44850D/BnaC03g03680D/BnaC03g…	46
GO:0006626	protein targeting to mitochondrion	165/12729	370/76374	2.17e-36	1.19e-34	7.22e-35	BnaA01g08910D/BnaA01g16980D/BnaA01g18280D/BnaA01g18390D/BnaA01g24550D/BnaA01g25720D/BnaA01g34150D/BnaA01g34210D/BnaA02g02770D/BnaA02g12240D/BnaA02g28050D/BnaA02g33340D/BnaA03g05630D/BnaA03g07780D/BnaA03g17190D/BnaA03g17540D/BnaA03g20520D/BnaA03g26550D/BnaA03g28320D/BnaA03g30090D/BnaA03g30210D/BnaA03g35540D/BnaA03g36610D/BnaA03g37240D/BnaA03g39510D/BnaA03g39920D/BnaA03g42130D/BnaA03g43550D/BnaA03g…	165
GO:0006366	transcription by RNA polymerase II	100/12729	167/76374	3.02e-36	1.61e-34	9.74e-35	BnaA01g01750D/BnaA01g05110D/BnaA01g10100D/BnaA01g11530D/BnaA02g00250D/BnaA02g07250D/BnaA02g23750D/BnaA02g29370D/BnaA02g31220D/BnaA02g32180D/BnaA02g33860D/BnaA03g09570D/BnaA03g09670D/BnaA03g19530D/BnaA03g31150D/BnaA03g38370D/BnaA03g41720D/BnaA03g44840D/BnaA03g50300D/BnaA05g02290D/BnaA05g14200D/BnaA06g00770D/BnaA06g27440D/BnaA06g28650D/BnaA06g31340D/BnaA06g36240D/BnaA07g01690D/BnaA07g36600D/BnaA08g…	100
GO:0006446	regulation of translational initiation	76/12729	106/76374	6.48e-36	3.35e-34	2.03e-34	BnaA01g03050D/BnaA01g03600D/BnaA01g30860D/BnaA01g30870D/BnaA01g32370D/BnaA02g11620D/BnaA02g21720D/BnaA02g28950D/BnaA02g36570D/BnaA03g24760D/BnaA03g31690D/BnaA03g45890D/BnaA03g56950D/BnaA03g56560D/BnaA03g57630D/BnaA04g02470D/BnaA04g22690D/BnaA04g26370D/BnaA05g05600D/BnaA05g27670D/BnaA05g30300D/BnaA06g06660D/BnaA06g30900D/BnaA06g32100D/BnaA07g04230D/BnaA07g20800D/BnaA07g33730D/BnaA08g11610D/BnaA08g…	76
GO:0015749	monosaccharide transmembrane transport	42/12729	42/76374	1.96e-33	9.88e-32	5.97e-32	BnaA01g11330D/BnaA01g36640D/BnaA03g29310D/BnaA03g35480D/BnaA03g35490D/BnaA05g19250D/BnaA05g31350D/BnaA06g05200D/BnaA06g06960D/BnaA06g28180D/BnaA06g28190D/BnaA06g39540D/BnaA07g03520D/BnaA07g03530D/BnaA08g26710D/BnaA08g28920D/BnaA09g04260D/BnaA09g47680D/BnaA09g48650D/BnaA10g04790D/BnaAnng03010D/BnaAnng41630D/BnaC01g12770D/BnaC01g28090D/BnaC01g32940D/BnaC03g34490D/BnaC03g41260D/BnaC05g05120D/BnaC05g…	42
GO:0002237	response to molecule of bacterial origin	166/12729	391/76374	2.05e-33	1e-31	6.04e-32	BnaA01g01430D/BnaA01g05060D/BnaA01g05490D/BnaA01g08270D/BnaA01g08320D/BnaA01g08380D/BnaA01g08400D/BnaA01g08410D/BnaA01g15650D/BnaA01g15660D/BnaA02g12240D/BnaA02g15460D/BnaA02g20100D/BnaA02g35120D/BnaA03g07160D/BnaA03g37660D/BnaA03g38990D/BnaA03g40050D/BnaA04g13270D/BnaA04g15350D/BnaA05g03030D/BnaA05g25910D/BnaA06g03560D/BnaA06g07500D/BnaA06g08120D/BnaA06g11580D/BnaA06g12210D/BnaA06g21690D/BnaA06g…	166
GO:0003755	peptidyl-prolyl cis-trans isomerase activity	99/12729	176/76374	1.01e-32	4.8e-31	2.9e-31	BnaA01g02260D/BnaA01g02340D/BnaA01g03810D/BnaA01g04590D/BnaA01g25460D/BnaA01g36700D/BnaA02g07550D/BnaA02g16680D/BnaA02g34180D/BnaA03g04200D/BnaA03g35450D/BnaA03g57740D/BnaA04g04410D/BnaA04g17840D/BnaA04g22160D/BnaA04g26170D/BnaA04g27460D/BnaA05g06380D/BnaA05g08140D/BnaA05g24020D/BnaA05g33830D/BnaA06g18830D/BnaA06g24990D/BnaA06g25390D/BnaA06g30120D/BnaA06g37360D/BnaA07g02080D/BnaA07g04040D/BnaA07g…	99
GO:0034968	histone lysine methylation	117/12729	232/76374	2.36e-32	1.09e-30	6.6e-31	BnaA01g07340D/BnaA01g07450D/BnaA01g25680D/BnaA01g26650D/BnaA01g33840D/BnaA01g33870D/BnaA02g04000D/BnaA02g05570D/BnaA02g23560D/BnaA02g30530D/BnaA03g02380D/BnaA03g02570D/BnaA03g06930D/BnaA03g08480D/BnaA03g18140D/BnaA03g21270D/BnaA03g28450D/BnaA03g34850D/BnaA03g35570D/BnaA03g37310D/BnaA03g39920D/BnaA03g49550D/BnaA03g49570D/BnaA04g26680D/BnaA04g27780D/BnaA05g01810D/BnaA05g05770D/BnaA05g13520D/BnaA05g…	117
GO:0000413	protein peptidyl-prolyl isomerization	94/12729	163/76374	2.51e-32	1.13e-30	6.84e-31	BnaA01g02260D/BnaA01g02340D/BnaA01g03810D/BnaA01g04590D/BnaA01g25460D/BnaA02g07550D/BnaA02g16680D/BnaA02g34180D/BnaA03g04200D/BnaA03g35450D/BnaA03g57740D/BnaA04g04410D/BnaA04g22160D/BnaA04g26170D/BnaA04g27460D/BnaA05g06380D/BnaA05g08140D/BnaA05g24020D/BnaA05g33830D/BnaA06g18830D/BnaA06g24990D/BnaA06g25390D/BnaA06g30120D/BnaA06g37360D/BnaA07g02080D/BnaA07g04040D/BnaA07g16240D/BnaA08g07170D/BnaA08g…	94
GO:0050826	response to freezing	170/12729	418/76374	1.86e-31	8.17e-30	4.94e-30	BnaA01g04030D/BnaA01g12740D/BnaA01g15830D/BnaA01g15860D/BnaA01g24560D/BnaA01g27690D/BnaA01g32790D/BnaA02g01670D/BnaA02g06350D/BnaA02g09140D/BnaA02g16040D/BnaA02g19810D/BnaA02g30530D/BnaA03g01920D/BnaA03g04360D/BnaA03g18330D/BnaA03g18970D/BnaA03g28730D/BnaA03g35810D/BnaA03g38370D/BnaA03g42250D/BnaA03g45660D/BnaA03g51290D/BnaA03g56740D/BnaA04g02470D/BnaA04g11670D/BnaA04g11980D/BnaA04g23970D/BnaA04g…	170
GO:0042545	cell wall modification	181/12729	462/76374	5.75e-31	2.47e-29	1.49e-29	BnaA01g13120D/BnaA01g26980D/BnaA01g28590D/BnaA01g32180D/BnaA02g02220D/BnaA02g05110D/BnaA02g06710D/BnaA02g06730D/BnaA02g13140D/BnaA02g15960D/BnaA02g30400D/BnaA02g31260D/BnaA03g00670D/BnaA03g01380D/BnaA03g05820D/BnaA03g08140D/BnaA03g09210D/BnaA03g15870D/BnaA03g19120D/BnaA03g26700D/BnaA03g27430D/BnaA03g30580D/BnaA03g30850D/BnaA03g31970D/BnaA03g37610D/BnaA03g42820D/BnaA03g43030D/BnaA03g47610D/BnaA03g…	181
GO:0009615	response to virus	81/12729	133/76374	2.2e-30	9.24e-29	5.58e-29	BnaA01g08910D/BnaA01g10100D/BnaA01g23620D/BnaA01g30490D/BnaA02g00030D/BnaA02g00050D/BnaA02g23750D/BnaA02g34480D/BnaA03g09570D/BnaA03g17330D/BnaA03g32320D/BnaA03g39320D/BnaA03g39340D/BnaA03g39350D/BnaA03g39360D/BnaA03g43550D/BnaA03g55950D/BnaA03g59360D/BnaA04g00500D/BnaA04g01300D/BnaA04g01310D/BnaA05g06890D/BnaA06g03820D/BnaA06g10730D/BnaA06g23890D/BnaA08g08530D/BnaA08g09280D/BnaA08g09300D/BnaA08g…	81
GO:0010182	sugar mediated signaling pathway	186/12729	493/76374	2.33e-29	9.52e-28	5.75e-28	BnaA01g04030D/BnaA01g12740D/BnaA01g15830D/BnaA01g15860D/BnaA01g20370D/BnaA01g27690D/BnaA01g33280D/BnaA02g01670D/BnaA02g09140D/BnaA02g16040D/BnaA02g19810D/BnaA02g24890D/BnaA02g29720D/BnaA02g30530D/BnaA03g01920D/BnaA03g04360D/BnaA03g18330D/BnaA03g27640D/BnaA03g28730D/BnaA03g32060D/BnaA03g35810D/BnaA03g38370D/BnaA03g42250D/BnaA03g45660D/BnaA03g51290D/BnaA04g02470D/BnaA04g04810D/BnaA04g11670D/BnaA04g…	186
GO:0000932	P-body	49/12729	59/76374	7.31e-29	2.86e-27	1.73e-27	BnaA01g29600D/BnaA02g01720D/BnaA02g04210D/BnaA02g24890D/BnaA03g12420D/BnaA03g33200D/BnaA05g25370D/BnaA05g34060D/BnaA06g04810D/BnaA07g37100D/BnaA08g04480D/BnaA08g19570D/BnaA08g27050D/BnaA09g06260D/BnaA09g44310D/BnaA09g48930D/BnaA10g06550D/BnaA10g15730D/BnaA10g19790D/BnaAnng26470D/BnaAnng28130D/BnaC01g37220D/BnaC02g04850D/BnaC02g33040D/BnaC02g44260D/BnaC03g05960D/BnaC03g15180D/BnaC03g38280D/BnaC04g…	49
GO:0005643	nuclear pore	76/12729	124/76374	7.31e-29	2.86e-27	1.73e-27	BnaA01g29590D/BnaA02g03360D/BnaA02g08370D/BnaA03g06340D/BnaA03g13670D/BnaA03g14650D/BnaA03g33980D/BnaA03g39420D/BnaA03g48700D/BnaA04g01730D/BnaA04g17210D/BnaA04g18170D/BnaA05g01320D/BnaA05g12310D/BnaA05g25340D/BnaA05g32360D/BnaA05g33950D/BnaA05g35320D/BnaA06g01550D/BnaA06g22080D/BnaA07g03260D/BnaA07g18110D/BnaA07g30300D/BnaA08g19040D/BnaA09g06150D/BnaA09g08910D/BnaA09g46560D/BnaA10g06760D/BnaA10g…	76
GO:0015145	monosaccharide transmembrane transporter activity	36/12729	36/76374	9.3e-29	3.56e-27	2.15e-27	BnaA01g11330D/BnaA01g36640D/BnaA03g29290D/BnaA03g29310D/BnaA03g35480D/BnaA03g35490D/BnaA05g19250D/BnaA05g31350D/BnaA06g05200D/BnaA06g06960D/BnaA06g28180D/BnaA06g28190D/BnaA08g26710D/BnaA08g28920D/BnaA09g47680D/BnaA09g48650D/BnaA10g04790D/BnaAnng03010D/BnaC01g12770D/BnaC01g28090D/BnaC01g32940D/BnaC03g34490D/BnaC03g41250D/BnaC03g41260D/BnaC05g05120D/BnaC05g06490D/BnaC05g08610D/BnaC05g32770D/BnaC05g…	36
GO:0010498	proteasomal protein catabolic process	164/12729	415/76374	1.05e-28	3.93e-27	2.37e-27	BnaA01g07540D/BnaA01g15800D/BnaA01g19850D/BnaA01g25680D/BnaA01g26860D/BnaA01g33660D/BnaA01g33840D/BnaA01g37400D/BnaA01g37380D/BnaA02g00190D/BnaA02g03360D/BnaA02g05110D/BnaA02g05570D/BnaA02g07080D/BnaA02g08360D/BnaA02g08370D/BnaA02g20120D/BnaA02g20240D/BnaA02g22660D/BnaA02g30700D/BnaA02g31710D/BnaA03g05820D/BnaA03g06340D/BnaA03g08140D/BnaA03g08480D/BnaA03g09510D/BnaA03g10910D/BnaA03g15330D/BnaA03g…	164
GO:0022626	cytosolic ribosome	159/12729	401/76374	4.55e-28	1.67e-26	1.01e-26	BnaA01g13120D/BnaA01g26980D/BnaA01g30640D/BnaA02g01690D/BnaA02g08230D/BnaA02g09300D/BnaA02g09480D/BnaA02g27960D/BnaA02g29320D/BnaA02g35430D/BnaA03g11120D/BnaA03g11590D/BnaA03g22290D/BnaA03g24870D/BnaA03g24880D/BnaA03g26700D/BnaA03g30850D/BnaA03g36540D/BnaA03g37240D/BnaA03g38250D/BnaA03g39320D/BnaA03g39360D/BnaA03g41260D/BnaA03g56530D/BnaA03g59360D/BnaA04g15980D/BnaA04g27460D/BnaA05g22070D/BnaA05g…	159
GO:0000159	protein phosphatase type 2A complex	62/12729	90/76374	5.29e-28	1.9e-26	1.15e-26	BnaA01g24050D/BnaA01g25200D/BnaA03g30500D/BnaA03g35530D/BnaA03g41870D/BnaA03g54310D/BnaA04g01980D/BnaA05g13880D/BnaA05g15320D/BnaA05g19180D/BnaA05g28660D/BnaA06g02170D/BnaA06g11930D/BnaA06g33370D/BnaA07g16560D/BnaA07g17860D/BnaA07g17880D/BnaA07g34200D/BnaA07g37150D/BnaA08g01840D/BnaA08g19440D/BnaA08g22990D/BnaA09g19590D/BnaA09g28590D/BnaA09g37450D/BnaA09g44840D/BnaA09g55040D/BnaAnng33670D/BnaAnng…	62
GO:0008143	poly(A) binding	35/12729	35/76374	5.59e-28	1.97e-26	1.19e-26	BnaA01g26250D/BnaA01g26260D/BnaA02g11420D/BnaA02g15520D/BnaA03g07560D/BnaA03g13280D/BnaA03g35110D/BnaA05g21030D/BnaA06g37550D/BnaA07g23430D/BnaA07g29550D/BnaA08g20740D/BnaA09g47610D/BnaA09g53390D/BnaA10g05130D/BnaA10g05830D/BnaA10g09200D/BnaA10g15760D/BnaC01g33540D/BnaC02g15930D/BnaC02g20760D/BnaC03g09580D/BnaC03g16090D/BnaC03g40810D/BnaC04g16540D/BnaC05g33800D/BnaC06g02820D/BnaC06g32740D/BnaC08g…	35
GO:0003899	DNA-directed 5'-3' RNA polymerase activity	106/12729	217/76374	5.75e-28	1.98e-26	1.2e-26	BnaA01g01750D/BnaA01g11530D/BnaA01g17530D/BnaA01g36190D/BnaA02g00250D/BnaA02g06560D/BnaA02g07250D/BnaA03g07780D/BnaA03g09670D/BnaA03g09990D/BnaA03g18810D/BnaA03g36610D/BnaA03g44840D/BnaA03g50300D/BnaA03g54760D/BnaA04g04070D/BnaA04g23840D/BnaA05g14200D/BnaA05g16440D/BnaA05g17270D/BnaA06g00770D/BnaA06g07130D/BnaA06g29470D/BnaA07g01690D/BnaA07g04260D/BnaA07g07550D/BnaA07g07580D/BnaA07g17420D/BnaA08g…	106
GO:0008536	Ran GTPase binding	85/12729	153/76374	8.58e-28	2.9e-26	1.75e-26	BnaA02g03360D/BnaA02g04500D/BnaA03g06340D/BnaA03g07760D/BnaA03g13680D/BnaA03g14650D/BnaA03g39420D/BnaA03g48700D/BnaA04g01730D/BnaA04g18170D/BnaA05g01320D/BnaA05g29380D/BnaA05g32360D/BnaA05g35320D/BnaA06g14080D/BnaA06g22080D/BnaA07g03260D/BnaA07g08680D/BnaA07g08920D/BnaA07g11650D/BnaA07g18110D/BnaA08g18670D/BnaA08g20070D/BnaA08g28880D/BnaA09g06150D/BnaA09g08910D/BnaA09g28010D/BnaA09g29490D/BnaA10g…	85
GO:0005852	eukaryotic translation initiation factor 3 complex	53/12729	70/76374	2e-27	6.66e-26	4.02e-26	BnaA01g03600D/BnaA01g30860D/BnaA01g30870D/BnaA02g11620D/BnaA02g21720D/BnaA02g28950D/BnaA02g36570D/BnaA03g24760D/BnaA03g31690D/BnaA03g45890D/BnaA03g56560D/BnaA04g02470D/BnaA04g22690D/BnaA05g05600D/BnaA05g27670D/BnaA06g06660D/BnaA06g32100D/BnaA08g11850D/BnaA08g25550D/BnaA09g17080D/BnaA09g21660D/BnaA09g35610D/BnaA09g36630D/BnaA09g47800D/BnaAnng38210D/BnaAnng23900D/BnaAnng23910D/BnaAnng09940D/BnaC01g…	53
GO:0019915	lipid storage	165/12729	429/76374	2.63e-27	8.58e-26	5.18e-26	BnaA01g04030D/BnaA01g12740D/BnaA01g15830D/BnaA01g15860D/BnaA01g24560D/BnaA01g26680D/BnaA01g27690D/BnaA02g01670D/BnaA02g09140D/BnaA02g16040D/BnaA02g19810D/BnaA02g30530D/BnaA03g01920D/BnaA03g04360D/BnaA03g18330D/BnaA03g18970D/BnaA03g28730D/BnaA03g34830D/BnaA03g35810D/BnaA03g38370D/BnaA03g42250D/BnaA03g45660D/BnaA03g51290D/BnaA04g02470D/BnaA04g11670D/BnaA04g11980D/BnaA04g23970D/BnaA04g25980D/BnaA04g…	165
GO:0030422	production of siRNA involved in RNA interference	72/12729	118/76374	3e-27	9.59e-26	5.79e-26	BnaA01g16980D/BnaA01g35820D/BnaA02g01670D/BnaA03g04360D/BnaA03g17170D/BnaA03g18810D/BnaA03g21510D/BnaA03g28730D/BnaA03g39630D/BnaA04g02470D/BnaA04g11670D/BnaA05g13830D/BnaA05g28820D/BnaA06g00410D/BnaA06g36240D/BnaA07g37700D/BnaA07g37440D/BnaA08g00560D/BnaA08g13850D/BnaA08g27630D/BnaA09g05440D/BnaA09g14430D/BnaA09g14440D/BnaA09g33780D/BnaA09g36630D/BnaA09g52620D/BnaA09g54590D/BnaA10g02250D/BnaA10g…	72
GO:0051301	cell division	144/12729	353/76374	4.79e-27	1.51e-25	9.1e-26	BnaA01g04230D/BnaA01g15860D/BnaA01g27690D/BnaA01g35820D/BnaA01g34740D/BnaA02g00190D/BnaA02g01670D/BnaA02g06350D/BnaA02g19520D/BnaA03g04360D/BnaA03g20470D/BnaA03g21080D/BnaA03g21780D/BnaA03g26120D/BnaA03g37510D/BnaA03g42250D/BnaA03g55890D/BnaA04g01210D/BnaA04g10580D/BnaA04g25980D/BnaA05g00540D/BnaA05g03550D/BnaA05g04460D/BnaA05g21420D/BnaA06g00360D/BnaA06g14500D/BnaA06g15750D/BnaA06g21130D/BnaA06g…	144
GO:2000652	regulation of secondary cell wall biogenesis	53/12729	71/76374	6.62e-27	2.04e-25	1.23e-25	BnaA01g03490D/BnaA01g12370D/BnaA02g03170D/BnaA02g16430D/BnaA02g28360D/BnaA02g35490D/BnaA03g30340D/BnaA03g52540D/BnaA03g58600D/BnaA05g29580D/BnaA05g29680D/BnaA06g11070D/BnaA06g11110D/BnaA06g25640D/BnaA07g20440D/BnaA07g25720D/BnaA07g30860D/BnaA07g34700D/BnaA08g10420D/BnaA08g22850D/BnaA09g11280D/BnaA09g11780D/BnaA09g44780D/BnaA09g44790D/BnaA09g56310D/BnaA10g10220D/BnaA10g10250D/BnaA10g10260D/BnaA10g…	53
GO:0006354	DNA-templated transcription, elongation	140/12729	340/76374	8.05e-27	2.44e-25	1.48e-25	BnaA01g30640D/BnaA01g34110D/BnaA01g34120D/BnaA01g34150D/BnaA01g34190D/BnaA01g34210D/BnaA01g34650D/BnaA02g01690D/BnaA02g02090D/BnaA02g06560D/BnaA02g23810D/BnaA02g31300D/BnaA02g36040D/BnaA03g04820D/BnaA03g18810D/BnaA03g20640D/BnaA03g27290D/BnaA03g28320D/BnaA03g53330D/BnaA03g53350D/BnaA03g54430D/BnaA03g54760D/BnaA04g02280D/BnaA04g20220D/BnaA04g24640D/BnaA04g25540D/BnaA05g03100D/BnaA05g03710D/BnaA05g…	140
GO:0001731	formation of translation preinitiation complex	51/12729	68/76374	4.15e-26	1.2e-24	7.24e-25	BnaA01g03600D/BnaA01g30860D/BnaA01g30870D/BnaA02g11620D/BnaA02g21720D/BnaA02g28950D/BnaA02g36570D/BnaA03g24760D/BnaA03g31690D/BnaA03g45890D/BnaA03g56560D/BnaA04g02470D/BnaA04g22690D/BnaA05g05600D/BnaA05g27670D/BnaA06g06660D/BnaA06g32100D/BnaA08g11850D/BnaA08g25550D/BnaA09g17080D/BnaA09g21660D/BnaA09g35610D/BnaA09g36630D/BnaA09g47800D/BnaAnng38210D/BnaAnng23900D/BnaAnng23910D/BnaAnng09940D/BnaC01g…	51
GO:0016282	eukaryotic 43S preinitiation complex	51/12729	68/76374	4.15e-26	1.2e-24	7.24e-25	BnaA01g03600D/BnaA01g30860D/BnaA01g30870D/BnaA02g11620D/BnaA02g21720D/BnaA02g28950D/BnaA02g36570D/BnaA03g24760D/BnaA03g31690D/BnaA03g45890D/BnaA03g56560D/BnaA04g02470D/BnaA04g22690D/BnaA05g05600D/BnaA05g27670D/BnaA06g06660D/BnaA06g32100D/BnaA08g11850D/BnaA08g25550D/BnaA09g17080D/BnaA09g21660D/BnaA09g35610D/BnaA09g36630D/BnaA09g47800D/BnaAnng38210D/BnaAnng23900D/BnaAnng23910D/BnaAnng09940D/BnaC01g…	51
GO:0033290	eukaryotic 48S preinitiation complex	51/12729	68/76374	4.15e-26	1.2e-24	7.24e-25	BnaA01g03600D/BnaA01g30860D/BnaA01g30870D/BnaA02g11620D/BnaA02g21720D/BnaA02g28950D/BnaA02g36570D/BnaA03g24760D/BnaA03g31690D/BnaA03g45890D/BnaA03g56560D/BnaA04g02470D/BnaA04g22690D/BnaA05g05600D/BnaA05g27670D/BnaA06g06660D/BnaA06g32100D/BnaA08g11850D/BnaA08g25550D/BnaA09g17080D/BnaA09g21660D/BnaA09g35610D/BnaA09g36630D/BnaA09g47800D/BnaAnng38210D/BnaAnng23900D/BnaAnng23910D/BnaAnng09940D/BnaC01g…	51
GO:0008380	RNA splicing	56/12729	80/76374	5.43e-26	1.54e-24	9.31e-25	BnaA01g35370D/BnaA03g01270D/BnaA04g00350D/BnaA04g26020D/BnaA04g29590D/BnaA05g12710D/BnaA05g18140D/BnaA05g19330D/BnaA05g28360D/BnaA05g36840D/BnaA06g15930D/BnaA06g21030D/BnaA06g37560D/BnaA07g39020D/BnaA08g27340D/BnaA09g01200D/BnaA09g40470D/BnaA09g50970D/BnaA10g25740D/BnaA10g28290D/BnaA10g28300D/BnaAnng12660D/BnaAnng00940D/BnaC01g19980D/BnaC01g26160D/BnaC01g31000D/BnaC02g02730D/BnaC02g23870D/BnaC03g…	56
GO:0003724	RNA helicase activity	32/12729	32/76374	1.22e-25	3.34e-24	2.02e-24	BnaA01g09260D/BnaA01g21530D/BnaA02g01370D/BnaA02g07640D/BnaA02g24890D/BnaA03g21690D/BnaA04g04890D/BnaA05g28820D/BnaA07g15960D/BnaA07g28540D/BnaA07g38500D/BnaA08g19730D/BnaA08g24620D/BnaA09g28880D/BnaA09g39790D/BnaA10g03630D/BnaC01g10860D/BnaC02g04460D/BnaC02g10710D/BnaC02g33040D/BnaC03g25960D/BnaC03g56670D/BnaC04g27610D/BnaC05g03550D/BnaC05g20380D/BnaC05g43300D/BnaC06g14380D/BnaC06g31150D/BnaC08g…	32
GO:0004739	pyruvate dehydrogenase (acetyl-transferring) activity	32/12729	32/76374	1.22e-25	3.34e-24	2.02e-24	BnaA01g22040D/BnaA02g11520D/BnaA03g13490D/BnaA03g54560D/BnaA07g09080D/BnaA07g28560D/BnaA08g17560D/BnaA08g17570D/BnaA09g26420D/BnaA09g29700D/BnaA09g51510D/BnaA10g00730D/BnaA10g05930D/BnaC01g28440D/BnaC02g16000D/BnaC03g16370D/BnaC03g59130D/BnaC04g53940D/BnaC04g53950D/BnaC04g53960D/BnaC05g00810D/BnaC05g19320D/BnaC06g31170D/BnaC07g12860D/BnaC08g45650D/BnaC08g45660D/BnaC08g46110D/BnaC09g26770D/BnaCnng…	32
GO:0009910	negative regulation of flower development	103/12729	226/76374	3.27e-24	8.86e-23	5.35e-23	BnaA01g05410D/BnaA01g33380D/BnaA02g06350D/BnaA02g26550D/BnaA02g33000D/BnaA02g33010D/BnaA02g33480D/BnaA02g34510D/BnaA02g34520D/BnaA03g06690D/BnaA03g22340D/BnaA03g35530D/BnaA03g39560D/BnaA03g51330D/BnaA03g51340D/BnaA04g12990D/BnaA04g15930D/BnaA05g19180D/BnaA05g26370D/BnaA05g28760D/BnaA05g32120D/BnaA06g09230D/BnaA06g23990D/BnaA06g28940D/BnaA06g34030D/BnaA06g38830D/BnaA06g38840D/BnaA07g13290D/BnaA07g…	103
GO:0043687	post-translational protein modification	143/12729	371/76374	5.55e-24	1.48e-22	8.94e-23	BnaA01g26090D/BnaA01g27690D/BnaA01g35820D/BnaA02g00920D/BnaA02g01670D/BnaA03g04360D/BnaA03g17170D/BnaA03g19480D/BnaA03g21510D/BnaA03g27830D/BnaA03g28730D/BnaA03g35810D/BnaA03g42250D/BnaA04g02470D/BnaA04g11670D/BnaA04g23940D/BnaA05g00970D/BnaA05g06130D/BnaA05g11420D/BnaA05g13830D/BnaA05g20380D/BnaA05g20560D/BnaA05g20990D/BnaA05g28820D/BnaA06g00410D/BnaA06g04450D/BnaA06g16810D/BnaA06g18830D/BnaA06g…	143
GO:0009081	branched-chain amino acid metabolic process	28/12729	28/76374	1.59e-22	3.99e-21	2.41e-21	BnaA01g20890D/BnaA02g12300D/BnaA03g35400D/BnaA05g36800D/BnaA06g15650D/BnaA06g37960D/BnaA06g37970D/BnaA08g02290D/BnaA08g26000D/BnaA08g26010D/BnaAnng36960D/BnaAnng29280D/BnaC03g41100D/BnaC03g41160D/BnaC03g68440D/BnaC03g68450D/BnaC05g07800D/BnaC05g07810D/BnaC05g33030D/BnaC06g03270D/BnaC07g15450D/BnaC08g13960D/BnaC08g13970D/BnaC08g48510D/BnaCnng26670D/BnaCnng05120D/BnaCnng05130D/BnaCnng51620D	28
GO:0052654	L-leucine transaminase activity	28/12729	28/76374	1.59e-22	3.99e-21	2.41e-21	BnaA01g20890D/BnaA02g12300D/BnaA03g35400D/BnaA05g36800D/BnaA06g15650D/BnaA06g37960D/BnaA06g37970D/BnaA08g02290D/BnaA08g26000D/BnaA08g26010D/BnaAnng36960D/BnaAnng29280D/BnaC03g41100D/BnaC03g41160D/BnaC03g68440D/BnaC03g68450D/BnaC05g07800D/BnaC05g07810D/BnaC05g33030D/BnaC06g03270D/BnaC07g15450D/BnaC08g13960D/BnaC08g13970D/BnaC08g48510D/BnaCnng26670D/BnaCnng05120D/BnaCnng05130D/BnaCnng51620D	28
GO:0052655	L-valine transaminase activity	28/12729	28/76374	1.59e-22	3.99e-21	2.41e-21	BnaA01g20890D/BnaA02g12300D/BnaA03g35400D/BnaA05g36800D/BnaA06g15650D/BnaA06g37960D/BnaA06g37970D/BnaA08g02290D/BnaA08g26000D/BnaA08g26010D/BnaAnng36960D/BnaAnng29280D/BnaC03g41100D/BnaC03g41160D/BnaC03g68440D/BnaC03g68450D/BnaC05g07800D/BnaC05g07810D/BnaC05g33030D/BnaC06g03270D/BnaC07g15450D/BnaC08g13960D/BnaC08g13970D/BnaC08g48510D/BnaCnng26670D/BnaCnng05120D/BnaCnng05130D/BnaCnng51620D	28
GO:0052656	L-isoleucine transaminase activity	28/12729	28/76374	1.59e-22	3.99e-21	2.41e-21	BnaA01g20890D/BnaA02g12300D/BnaA03g35400D/BnaA05g36800D/BnaA06g15650D/BnaA06g37960D/BnaA06g37970D/BnaA08g02290D/BnaA08g26000D/BnaA08g26010D/BnaAnng36960D/BnaAnng29280D/BnaC03g41100D/BnaC03g41160D/BnaC03g68440D/BnaC03g68450D/BnaC05g07800D/BnaC05g07810D/BnaC05g33030D/BnaC06g03270D/BnaC07g15450D/BnaC08g13960D/BnaC08g13970D/BnaC08g48510D/BnaCnng26670D/BnaCnng05120D/BnaCnng05130D/BnaCnng51620D	28
GO:0051017	actin filament bundle assembly	40/12729	51/76374	4.84e-22	1.2e-20	7.25e-21	BnaA03g21170D/BnaA03g56620D/BnaA04g00810D/BnaA04g03370D/BnaA04g26440D/BnaA05g05130D/BnaA05g05680D/BnaA06g06000D/BnaA06g14330D/BnaA07g11570D/BnaA07g11590D/BnaA07g32270D/BnaA08g21880D/BnaA08g25900D/BnaA09g35350D/BnaA09g36730D/BnaA09g39010D/BnaA10g00230D/BnaAnng14450D/BnaAnng26690D/BnaC03g22290D/BnaC03g25470D/BnaC03g52320D/BnaC04g04510D/BnaC04g05460D/BnaC04g25270D/BnaC04g50470D/BnaC05g00310D/BnaC05g…	40
GO:0000059	obsolete protein import into nucleus, docking	43/12729	58/76374	6.82e-22	1.67e-20	1.01e-20	BnaA02g03360D/BnaA02g08370D/BnaA03g06340D/BnaA03g14650D/BnaA03g39420D/BnaA03g48700D/BnaA04g01730D/BnaA04g18170D/BnaA05g01320D/BnaA05g32360D/BnaA05g35320D/BnaA07g03260D/BnaA07g18110D/BnaA09g08910D/BnaA10g06760D/BnaA10g17560D/BnaAnng11870D/BnaC01g20230D/BnaC02g06980D/BnaC03g08140D/BnaC03g08180D/BnaC03g17650D/BnaC03g46820D/BnaC04g12980D/BnaC04g23250D/BnaC04g42240D/BnaC04g49920D/BnaC04g52130D/BnaC05g…	43
GO:0008284	positive regulation of cell population proliferation	122/12729	310/76374	1.4e-21	3.38e-20	2.04e-20	BnaA01g05880D/BnaA01g10100D/BnaA01g12740D/BnaA01g20470D/BnaA01g26090D/BnaA01g32450D/BnaA02g00920D/BnaA02g00980D/BnaA02g03600D/BnaA02g23750D/BnaA03g00430D/BnaA03g02540D/BnaA03g04760D/BnaA03g09570D/BnaA03g09940D/BnaA03g12870D/BnaA03g19480D/BnaA03g20220D/BnaA03g21080D/BnaA03g24480D/BnaA03g24490D/BnaA03g29840D/BnaA03g35810D/BnaA03g45660D/BnaA03g49230D/BnaA04g01210D/BnaA04g23940D/BnaA05g06130D/BnaA05g…	122
GO:0010267	production of ta-siRNAs involved in RNA interference	158/12729	450/76374	1.77e-21	4.21e-20	2.54e-20	BnaA01g10280D/BnaA01g25700D/BnaA01g27140D/BnaA01g35370D/BnaA02g00210D/BnaA02g01360D/BnaA02g08440D/BnaA02g29370D/BnaA02g34970D/BnaA03g02430D/BnaA03g03540D/BnaA03g08110D/BnaA03g18330D/BnaA03g35550D/BnaA03g35810D/BnaA03g37310D/BnaA03g39050D/BnaA03g54760D/BnaA04g15560D/BnaA04g18070D/BnaA04g26020D/BnaA04g26420D/BnaA05g05110D/BnaA05g06270D/BnaA05g06280D/BnaA05g11420D/BnaA05g16620D/BnaA05g17060D/BnaA05g…	158
GO:0015934	large ribosomal subunit	58/12729	99/76374	5.31e-21	1.25e-19	7.53e-20	BnaA01g34100D/BnaA02g09540D/BnaA03g11790D/BnaA03g20640D/BnaA03g27290D/BnaA04g01900D/BnaA04g24640D/BnaA05g03100D/BnaA05g03710D/BnaA06g19320D/BnaA06g21910D/BnaA06g23640D/BnaA06g25250D/BnaA06g26250D/BnaA07g00010D/BnaA07g17990D/BnaA07g36200D/BnaA09g05260D/BnaA09g06950D/BnaA09g43890D/BnaA09g49950D/BnaA09g50400D/BnaA09g55200D/BnaA10g03220D/BnaA10g08390D/BnaAnng34360D/BnaAnng21810D/BnaAnng21820D/BnaC02g…	58
GO:0000184	nuclear-transcribed mRNA catabolic process, nonsense-mediated decay	26/12729	26/76374	5.74e-21	1.29e-19	7.82e-20	BnaA02g04210D/BnaA02g24890D/BnaA03g51330D/BnaA03g51340D/BnaA05g20690D/BnaA07g25560D/BnaA08g06560D/BnaA09g23470D/BnaA09g42530D/BnaA10g15730D/BnaA10g18060D/BnaC01g39630D/BnaC02g06480D/BnaC02g31600D/BnaC02g33040D/BnaC02g44260D/BnaC03g68710D/BnaC06g07870D/BnaC06g27360D/BnaC08g07140D/BnaC09g19890D/BnaC09g19900D/BnaC09g38310D/BnaC09g41560D/BnaCnng22070D/BnaCnng78160D	26
GO:0003978	UDP-glucose 4-epimerase activity	26/12729	26/76374	5.74e-21	1.29e-19	7.82e-20	BnaA01g10650D/BnaA01g13540D/BnaA05g09030D/BnaA06g38100D/BnaA08g24600D/BnaA09g10850D/BnaA09g12250D/BnaA09g17150D/BnaA09g22180D/BnaA09g25900D/BnaAnng39400D/BnaAnng10090D/BnaC01g12180D/BnaC01g15760D/BnaC05g23640D/BnaC05g49280D/BnaC07g18010D/BnaC07g18040D/BnaC07g38610D/BnaC08g15730D/BnaC09g12180D/BnaC09g18390D/BnaC09g26030D/BnaCnng21690D/BnaCnng22570D/BnaCnng14830D	26
GO:0006378	mRNA polyadenylation	26/12729	26/76374	5.74e-21	1.29e-19	7.82e-20	BnaA01g07160D/BnaA01g14790D/BnaA02g21010D/BnaA03g47500D/BnaA05g03310D/BnaA06g26440D/BnaA06g26770D/BnaA08g30980D/BnaA09g20180D/BnaA09g37880D/BnaAnng27360D/BnaAnng08120D/BnaC01g08640D/BnaC01g17430D/BnaC01g28980D/BnaC02g15600D/BnaC02g23020D/BnaC04g02920D/BnaC06g27490D/BnaC07g08330D/BnaC07g30520D/BnaC07g39750D/BnaC08g29740D/BnaC08g47260D/BnaC09g22510D/BnaCnng18960D	26
GO:0008565	obsolete protein transporter activity	119/12729	304/76374	7.28e-21	1.62e-19	9.8e-20	BnaA01g11090D/BnaA01g17690D/BnaA01g25490D/BnaA02g03360D/BnaA02g08370D/BnaA02g20480D/BnaA02g30700D/BnaA03g06340D/BnaA03g14650D/BnaA03g20980D/BnaA03g24970D/BnaA03g26280D/BnaA03g35990D/BnaA03g39420D/BnaA03g42370D/BnaA03g48700D/BnaA04g01730D/BnaA04g18170D/BnaA04g26040D/BnaA05g01320D/BnaA05g04540D/BnaA05g19980D/BnaA05g21820D/BnaA05g29380D/BnaA05g31550D/BnaA05g32360D/BnaA05g35320D/BnaA06g05340D/BnaA06g…	119
GO:0006184	obsolete GTP catabolic process	165/12729	489/76374	2.36e-20	5.18e-19	3.13e-19	BnaA01g05530D/BnaA01g06530D/BnaA01g17590D/BnaA01g17600D/BnaA01g25920D/BnaA02g00620D/BnaA02g06370D/BnaA02g06400D/BnaA02g09190D/BnaA02g17730D/BnaA02g22660D/BnaA02g29110D/BnaA02g31570D/BnaA02g31580D/BnaA02g35070D/BnaA03g03040D/BnaA03g08920D/BnaA03g13610D/BnaA03g25920D/BnaA03g31920D/BnaA03g36930D/BnaA03g50330D/BnaA03g56000D/BnaA04g00300D/BnaA04g12520D/BnaA04g17180D/BnaA04g20940D/BnaA04g26420D/BnaA05g…	165
GO:0008429	phosphatidylethanolamine binding	25/12729	25/76374	3.45e-20	7.49e-19	4.53e-19	BnaA03g22340D/BnaA04g15930D/BnaA06g12320D/BnaA06g21490D/BnaA07g13290D/BnaA07g33120D/BnaA09g44700D/BnaA10g26300D/BnaA10g27630D/BnaAnng00810D/BnaC01g41050D/BnaC02g02900D/BnaC02g23820D/BnaC03g01440D/BnaC03g47080D/BnaC03g52010D/BnaC03g64560D/BnaC04g14850D/BnaC04g16750D/BnaC04g39220D/BnaC05g50120D/BnaC08g37400D/BnaCnng03920D/BnaCnng48850D/BnaCnng10680D	25
GO:0004386	helicase activity	70/12729	140/76374	1.02e-19	2.19e-18	1.33e-18	BnaA01g25700D/BnaA03g21720D/BnaA03g29880D/BnaA03g35550D/BnaA03g37310D/BnaA03g39050D/BnaA03g59630D/BnaA04g04100D/BnaA04g19340D/BnaA04g23510D/BnaA05g17500D/BnaA05g19140D/BnaA05g20990D/BnaA05g26370D/BnaA06g02830D/BnaA06g36680D/BnaA07g05670D/BnaA07g05680D/BnaA07g13100D/BnaA07g28960D/BnaA07g35880D/BnaA08g02330D/BnaA08g03380D/BnaA09g08300D/BnaA09g18980D/BnaA09g50860D/BnaA10g15020D/BnaA10g21580D/BnaC01g…	70
GO:0009933	meristem structural organization	119/12729	314/76374	1.56e-19	3.31e-18	2e-18	BnaA01g04030D/BnaA01g07860D/BnaA01g15830D/BnaA01g15860D/BnaA02g09140D/BnaA02g19810D/BnaA02g30530D/BnaA03g01920D/BnaA03g18330D/BnaA03g18970D/BnaA03g28730D/BnaA03g35810D/BnaA03g38370D/BnaA03g51290D/BnaA03g58880D/BnaA04g02470D/BnaA04g11670D/BnaA04g11980D/BnaA04g23970D/BnaA05g02230D/BnaA05g08020D/BnaA05g20380D/BnaA05g28820D/BnaA06g28290D/BnaA06g29740D/BnaA06g34560D/BnaA07g04710D/BnaA07g05640D/BnaA07g…	119
GO:0033523	histone H2B ubiquitination	24/12729	24/76374	2.07e-19	4.34e-18	2.62e-18	BnaA02g26550D/BnaA02g33480D/BnaA04g25980D/BnaA05g04460D/BnaA06g09230D/BnaA06g34030D/BnaA08g00600D/BnaA08g24010D/BnaA08g24020D/BnaA09g19140D/BnaA09g57120D/BnaAnng21040D/BnaAnng21880D/BnaC02g34760D/BnaC03g70390D/BnaC04g03880D/BnaC04g50050D/BnaC05g10640D/BnaC05g49100D/BnaC07g21870D/BnaC08g16110D/BnaC08g39660D/BnaC09g21080D/BnaCnng51240D	24
GO:0015935	small ribosomal subunit	31/12729	37/76374	5.93e-19	1.23e-17	7.41e-18	BnaA01g30020D/BnaA01g30270D/BnaA01g34100D/BnaA02g19520D/BnaA03g04820D/BnaA03g32670D/BnaA04g19830D/BnaA05g26150D/BnaA06g10510D/BnaA06g19320D/BnaA07g35460D/BnaA08g02040D/BnaA10g19390D/BnaAnng40440D/BnaC01g13450D/BnaC02g05260D/BnaC02g46590D/BnaC03g06390D/BnaC03g31150D/BnaC03g73600D/BnaC04g44220D/BnaC05g12060D/BnaC05g40270D/BnaC06g40390D/BnaC07g02120D/BnaC08g38670D/BnaC09g15240D/BnaC09g16640D/BnaC09g…	31
GO:0005786	signal recognition particle, endoplasmic reticulum targeting	35/12729	46/76374	1.07e-18	2.2e-17	1.33e-17	BnaA01g06530D/BnaA02g33100D/BnaA03g50330D/BnaA04g26420D/BnaA05g05110D/BnaA05g17060D/BnaA06g03460D/BnaA06g09990D/BnaA06g21420D/BnaA07g24920D/BnaA07g24930D/BnaA07g26580D/BnaA08g02940D/BnaA08g02950D/BnaA08g03500D/BnaA10g26220D/BnaAnng40040D/BnaAnng00870D/BnaC01g07800D/BnaC02g02820D/BnaC02g02830D/BnaC02g29710D/BnaC03g52150D/BnaC04g04490D/BnaC04g50450D/BnaC05g11610D/BnaC05g25860D/BnaC06g01660D/BnaC06g…	35
GO:0000418	RNA polymerase IV complex	39/12729	56/76374	2.08e-18	4.21e-17	2.54e-17	BnaA01g17530D/BnaA01g36190D/BnaA03g07780D/BnaA03g18810D/BnaA03g36610D/BnaA03g54760D/BnaA05g14200D/BnaA05g16440D/BnaA05g17270D/BnaA06g00770D/BnaA06g07130D/BnaA07g04260D/BnaA08g01040D/BnaA08g25270D/BnaA09g02260D/BnaA09g08480D/BnaA09g10720D/BnaA09g22420D/BnaAnng40790D/BnaC03g09790D/BnaC03g42760D/BnaC03g69840D/BnaC03g72290D/BnaC04g05330D/BnaC04g20180D/BnaC04g26910D/BnaC04g32020D/BnaC05g30230D/BnaC07g…	39
GO:0016579	protein deubiquitination	97/12729	242/76374	4.07e-18	8.15e-17	4.92e-17	BnaA01g04030D/BnaA01g14860D/BnaA01g16980D/BnaA01g35820D/BnaA02g10840D/BnaA02g33480D/BnaA03g01920D/BnaA03g19480D/BnaA03g27830D/BnaA03g47570D/BnaA04g23940D/BnaA04g23970D/BnaA04g25980D/BnaA04g26230D/BnaA04g27280D/BnaA05g02230D/BnaA05g04460D/BnaA05g04900D/BnaA05g06130D/BnaA05g28820D/BnaA06g02150D/BnaA06g09230D/BnaA06g18830D/BnaA06g34560D/BnaA07g05640D/BnaA07g05650D/BnaA07g10750D/BnaA07g25370D/BnaA08g…	97
GO:0051015	actin filament binding	51/12729	89/76374	4.53e-18	8.95e-17	5.41e-17	BnaA01g06850D/BnaA03g21170D/BnaA03g38430D/BnaA03g56620D/BnaA04g00810D/BnaA04g03370D/BnaA04g26440D/BnaA05g05130D/BnaA05g05680D/BnaA06g06000D/BnaA06g14330D/BnaA07g11570D/BnaA07g11590D/BnaA07g32270D/BnaA08g13190D/BnaA08g21880D/BnaA08g25900D/BnaA09g35350D/BnaA09g36730D/BnaA09g39010D/BnaA10g00230D/BnaAnng10840D/BnaAnng14450D/BnaAnng15630D/BnaAnng26690D/BnaC01g08210D/BnaC03g22290D/BnaC03g25470D/BnaC03g…	51
GO:0000312	plastid small ribosomal subunit	39/12729	57/76374	5.52e-18	1.08e-16	6.52e-17	BnaA01g34120D/BnaA01g34150D/BnaA01g34210D/BnaA02g23810D/BnaA03g28320D/BnaA04g20220D/BnaA05g09320D/BnaA05g32840D/BnaA06g19350D/BnaA06g19380D/BnaA07g21930D/BnaA08g27790D/BnaA09g18590D/BnaA09g18600D/BnaA09g32090D/BnaA09g50580D/BnaA10g02510D/BnaAnng19390D/BnaC02g41150D/BnaC03g03830D/BnaC03g31130D/BnaC03g33480D/BnaC03g58110D/BnaC04g10720D/BnaC04g37140D/BnaC05g02380D/BnaC05g48140D/BnaC06g22640D/BnaC06g…	39
GO:0048825	cotyledon development	124/12729	347/76374	6.92e-18	1.34e-16	8.08e-17	BnaA01g04230D/BnaA01g12740D/BnaA01g15450D/BnaA01g15860D/BnaA01g27690D/BnaA01g35820D/BnaA01g34740D/BnaA02g00930D/BnaA02g01670D/BnaA02g05710D/BnaA02g19520D/BnaA02g24890D/BnaA03g04360D/BnaA03g26120D/BnaA03g31180D/BnaA03g32060D/BnaA03g37510D/BnaA03g42250D/BnaA03g45660D/BnaA03g47930D/BnaA04g04810D/BnaA04g15500D/BnaA04g25980D/BnaA05g04460D/BnaA05g27130D/BnaA06g15750D/BnaA06g21130D/BnaA06g21880D/BnaA07g…	124
GO:0000028	ribosomal small subunit assembly	22/12729	22/76374	7.48e-18	1.43e-16	8.65e-17	BnaA02g15960D/BnaA02g29450D/BnaA03g01450D/BnaA04g14320D/BnaA04g26860D/BnaA05g14360D/BnaA05g19730D/BnaA07g23080D/BnaA07g30140D/BnaA09g41430D/BnaA10g25520D/BnaAnng01090D/BnaC02g02550D/BnaC02g21380D/BnaC02g22690D/BnaC02g44920D/BnaC03g02510D/BnaC04g36490D/BnaC05g42400D/BnaC06g24350D/BnaC06g33580D/BnaC09g50780D	22
GO:0016157	sucrose synthase activity	29/12729	35/76374	1.5e-17	2.84e-16	1.71e-16	BnaA01g10280D/BnaA03g08110D/BnaA04g18070D/BnaA05g06270D/BnaA05g06280D/BnaA05g12940D/BnaA05g16620D/BnaA07g22680D/BnaA07g30830D/BnaA07g35820D/BnaA07g38260D/BnaA09g00710D/BnaA10g14710D/BnaC01g41280D/BnaC03g10290D/BnaC04g06500D/BnaC04g06510D/BnaC04g06520D/BnaC06g12120D/BnaC06g23590D/BnaC06g34330D/BnaC09g37040D/BnaCnng23260D/BnaCnng74430D/BnaCnng33740D/BnaCnng53380D/BnaCnng61100D/BnaCnng15380D/BnaUnng…	29
GO:0043531	ADP binding	127/12729	363/76374	1.96e-17	3.68e-16	2.22e-16	BnaA01g01450D/BnaA01g01460D/BnaA01g03580D/BnaA01g18700D/BnaA01g33710D/BnaA02g03790D/BnaA02g03810D/BnaA02g03820D/BnaA02g03830D/BnaA02g04080D/BnaA02g23810D/BnaA02g28790D/BnaA02g30250D/BnaA02g30300D/BnaA02g31380D/BnaA02g35050D/BnaA03g03260D/BnaA03g03830D/BnaA03g07040D/BnaA03g14540D/BnaA03g44070D/BnaA03g44080D/BnaA03g46200D/BnaA03g56180D/BnaA05g12030D/BnaA05g12730D/BnaA05g25000D/BnaA06g08320D/BnaA06g…	127
GO:0031053	primary miRNA processing	21/12729	21/76374	4.5e-17	8.24e-16	4.98e-16	BnaA03g08110D/BnaA03g38370D/BnaA06g36240D/BnaA07g13040D/BnaA09g06260D/BnaA09g08310D/BnaA10g00800D/BnaA10g14710D/BnaAnng26470D/BnaC03g10290D/BnaC04g17070D/BnaC04g38630D/BnaC05g00860D/BnaC07g17720D/BnaC09g08560D/BnaC09g08570D/BnaC09g08580D/BnaC09g37040D/BnaC09g50880D/BnaC09g50890D/BnaUnng02290D	21
GO:2000072	regulation of defense response to fungus, incompatible interaction	21/12729	21/76374	4.5e-17	8.24e-16	4.98e-16	BnaA01g13250D/BnaA01g13260D/BnaA02g05570D/BnaA03g08480D/BnaA03g24740D/BnaA03g46050D/BnaA09g21880D/BnaA10g14040D/BnaC01g15070D/BnaC01g15090D/BnaC02g09460D/BnaC03g10810D/BnaC03g29350D/BnaC03g44000D/BnaC05g20210D/BnaC05g38040D/BnaC07g38370D/BnaC09g24130D/BnaCnng22650D/BnaCnng42110D/BnaUnng04040D	21
GO:0007010	cytoskeleton organization	149/12729	457/76374	4.89e-17	8.87e-16	5.36e-16	BnaA01g07540D/BnaA01g15800D/BnaA01g25680D/BnaA01g26860D/BnaA01g33660D/BnaA01g33840D/BnaA01g37400D/BnaA01g37380D/BnaA02g00190D/BnaA02g03360D/BnaA02g05110D/BnaA02g05570D/BnaA02g08360D/BnaA02g08370D/BnaA02g20120D/BnaA02g20240D/BnaA02g22660D/BnaA02g30700D/BnaA02g31710D/BnaA03g05820D/BnaA03g06340D/BnaA03g08140D/BnaA03g08480D/BnaA03g10910D/BnaA03g15330D/BnaA03g19770D/BnaA03g28450D/BnaA03g28460D/BnaA03g…	149
GO:0015030	Cajal body	33/12729	45/76374	7.05e-17	1.27e-15	7.65e-16	BnaA01g10630D/BnaA03g02430D/BnaA04g15560D/BnaA05g12150D/BnaA06g05600D/BnaA06g05650D/BnaA06g37560D/BnaA07g00340D/BnaA07g13010D/BnaA08g09450D/BnaA08g26160D/BnaA08g26200D/BnaA09g10290D/BnaA09g43720D/BnaA09g48310D/BnaA09g53020D/BnaA09g56020D/BnaC01g12160D/BnaC03g58390D/BnaC03g63890D/BnaC04g14490D/BnaC04g38560D/BnaC04g54830D/BnaC04g56440D/BnaC05g07140D/BnaC05g07190D/BnaC06g02830D/BnaC07g00380D/BnaC08g…	33
GO:0051604	protein maturation	91/12729	229/76374	8.22e-17	1.46e-15	8.83e-16	BnaA01g16980D/BnaA02g05570D/BnaA02g10660D/BnaA03g03460D/BnaA03g04950D/BnaA03g07780D/BnaA03g08480D/BnaA03g14400D/BnaA03g16890D/BnaA03g17200D/BnaA03g21030D/BnaA03g24730D/BnaA03g36610D/BnaA04g04890D/BnaA05g01820D/BnaA05g04580D/BnaA05g04600D/BnaA05g07100D/BnaA05g07490D/BnaA05g16440D/BnaA05g17270D/BnaA05g35180D/BnaA06g06930D/BnaA07g08190D/BnaA07g15960D/BnaA08g03490D/BnaA08g13850D/BnaA08g18140D/BnaA09g…	91
GO:0010030	positive regulation of seed germination	45/12729	78/76374	2.84e-16	5e-15	3.02e-15	BnaA01g19370D/BnaA01g23280D/BnaA02g35880D/BnaA03g13980D/BnaA04g17550D/BnaA05g11980D/BnaA05g12650D/BnaA06g12320D/BnaA06g13580D/BnaA06g13670D/BnaA07g08390D/BnaA07g21790D/BnaA07g31980D/BnaA07g36000D/BnaA08g10550D/BnaA08g18290D/BnaA08g29490D/BnaA09g15940D/BnaA09g27240D/BnaA09g44150D/BnaA09g44700D/BnaA09g49440D/BnaA10g04840D/BnaA10g12140D/BnaAnng38010D/BnaAnng04430D/BnaAnng30990D/BnaC02g40330D/BnaC03g…	45
GO:0000079	regulation of cyclin-dependent protein serine/threonine kinase activity	52/12729	101/76374	1.01e-15	1.75e-14	1.06e-14	BnaA01g00430D/BnaA01g10100D/BnaA02g23750D/BnaA02g30350D/BnaA02g30360D/BnaA03g01900D/BnaA03g09570D/BnaA03g46850D/BnaA06g14500D/BnaA06g25730D/BnaA06g30080D/BnaA07g03310D/BnaA07g21450D/BnaA07g32610D/BnaA07g36800D/BnaA07g36600D/BnaA08g09280D/BnaA08g18850D/BnaA08g21740D/BnaA09g09200D/BnaA09g28170D/BnaA10g21170D/BnaA10g26520D/BnaAnng23850D/BnaAnng05470D/BnaAnng30800D/BnaAnng01620D/BnaC01g01420D/BnaC01g…	52
GO:0010564	regulation of cell cycle process	74/12729	175/76374	1.18e-15	2.03e-14	1.23e-14	BnaA01g00430D/BnaA01g05690D/BnaA01g15450D/BnaA01g27690D/BnaA02g01670D/BnaA02g06560D/BnaA02g29040D/BnaA03g04360D/BnaA03g26120D/BnaA03g42250D/BnaA03g47930D/BnaA05g11420D/BnaA06g15750D/BnaA06g21130D/BnaA07g08390D/BnaA07g14790D/BnaA08g11670D/BnaA08g14390D/BnaA08g16340D/BnaA08g18290D/BnaA09g00890D/BnaA09g08880D/BnaA09g27240D/BnaA09g36280D/BnaA09g51080D/BnaA09g52220D/BnaA10g01340D/BnaA10g01560D/BnaA10g…	74
GO:0004221	obsolete ubiquitin thiolesterase activity	55/12729	111/76374	1.34e-15	2.29e-14	1.38e-14	BnaA01g05140D/BnaA01g06250D/BnaA01g12160D/BnaA01g34630D/BnaA03g05930D/BnaA03g08340D/BnaA03g24420D/BnaA03g43110D/BnaA03g45310D/BnaA04g20830D/BnaA04g20840D/BnaA05g25080D/BnaA06g02150D/BnaA06g13940D/BnaA06g15750D/BnaA06g21130D/BnaA07g25370D/BnaA08g01820D/BnaA08g12840D/BnaA09g24160D/BnaA10g14260D/BnaAnng36850D/BnaAnng15910D/BnaAnng21270D/BnaAnng26520D/BnaAnng28020D/BnaC01g00780D/BnaC01g06800D/BnaC01g…	55
GO:0016973	poly(A)+ mRNA export from nucleus	22/12729	24/76374	1.46e-15	2.47e-14	1.49e-14	BnaA04g04890D/BnaA07g01140D/BnaA07g15960D/BnaA07g20390D/BnaA07g34790D/BnaA09g46560D/BnaA10g26960D/BnaAnng23370D/BnaAnng00450D/BnaC02g23650D/BnaC02g23660D/BnaC04g05800D/BnaC04g27610D/BnaC05g50310D/BnaC06g14380D/BnaC06g19930D/BnaC06g39690D/BnaC07g19510D/BnaC08g40580D/BnaCnng28710D/BnaCnng03280D/BnaCnng49580D	22
GO:0030515	snoRNA binding	19/12729	19/76374	1.62e-15	2.72e-14	1.64e-14	BnaA01g14860D/BnaA02g10840D/BnaA03g47570D/BnaA07g00340D/BnaA08g31010D/BnaA09g10290D/BnaA09g43720D/BnaA09g56020D/BnaC01g17500D/BnaC01g17510D/BnaC02g07930D/BnaC02g15060D/BnaC05g22850D/BnaC07g00380D/BnaC07g39820D/BnaC09g10460D/BnaC09g28420D/BnaC09g28460D/BnaC09g39670D	19
GO:0000956	nuclear-transcribed mRNA catabolic process	129/12729	390/76374	1.69e-15	2.8e-14	1.69e-14	BnaA01g04100D/BnaA01g05810D/BnaA01g11530D/BnaA01g24690D/BnaA01g25700D/BnaA01g32010D/BnaA02g20550D/BnaA03g04760D/BnaA03g15450D/BnaA03g18500D/BnaA03g32060D/BnaA03g35810D/BnaA03g39630D/BnaA03g44840D/BnaA04g07990D/BnaA04g23670D/BnaA04g25980D/BnaA04g26310D/BnaA05g04460D/BnaA05g20380D/BnaA05g27130D/BnaA06g02830D/BnaA06g11910D/BnaA06g27440D/BnaA06g32030D/BnaA06g33320D/BnaA07g05350D/BnaA07g22980D/BnaA07g…	129
GO:0097159	organic cyclic compound binding	46/12729	84/76374	2.05e-15	3.35e-14	2.02e-14	BnaA01g00750D/BnaA01g09040D/BnaA02g22430D/BnaA03g35210D/BnaA03g36000D/BnaA03g41720D/BnaA03g48140D/BnaA06g22020D/BnaA07g24340D/BnaA07g24350D/BnaA07g35880D/BnaA08g04310D/BnaA09g37880D/BnaA09g43830D/BnaA09g43840D/BnaA09g46870D/BnaA10g25500D/BnaAnng34540D/BnaAnng20240D/BnaC01g27460D/BnaC01g35330D/BnaC02g14490D/BnaC02g18250D/BnaC02g27510D/BnaC02g32830D/BnaC03g04370D/BnaC03g08660D/BnaC03g40900D/BnaC03g…	46
GO:1901363	heterocyclic compound binding	46/12729	84/76374	2.05e-15	3.35e-14	2.02e-14	BnaA01g00750D/BnaA01g09040D/BnaA02g22430D/BnaA03g35210D/BnaA03g36000D/BnaA03g41720D/BnaA03g48140D/BnaA06g22020D/BnaA07g24340D/BnaA07g24350D/BnaA07g35880D/BnaA08g04310D/BnaA09g37880D/BnaA09g43830D/BnaA09g43840D/BnaA09g46870D/BnaA10g25500D/BnaAnng34540D/BnaAnng20240D/BnaC01g27460D/BnaC01g35330D/BnaC02g14490D/BnaC02g18250D/BnaC02g27510D/BnaC02g32830D/BnaC03g04370D/BnaC03g08660D/BnaC03g40900D/BnaC03g…	46
GO:0006342	chromatin silencing	118/12729	347/76374	2.79e-15	4.5e-14	2.72e-14	BnaA01g04120D/BnaA01g06210D/BnaA01g35370D/BnaA02g20480D/BnaA03g01900D/BnaA03g02750D/BnaA03g04530D/BnaA03g06690D/BnaA03g08110D/BnaA03g14370D/BnaA03g18330D/BnaA03g18810D/BnaA03g26280D/BnaA03g35810D/BnaA03g38370D/BnaA03g39050D/BnaA03g42820D/BnaA03g43030D/BnaA03g46850D/BnaA03g51130D/BnaA04g13850D/BnaA04g15690D/BnaA04g26020D/BnaA04g26230D/BnaA05g04900D/BnaA05g11560D/BnaA05g18140D/BnaA05g20380D/BnaA05g…	118
GO:0009553	embryo sac development	84/12729	214/76374	2.84e-15	4.55e-14	2.75e-14	BnaA01g05410D/BnaA01g17510D/BnaA01g35360D/BnaA01g35450D/BnaA02g06350D/BnaA02g10660D/BnaA02g22840D/BnaA03g14400D/BnaA03g57210D/BnaA04g11000D/BnaA05g03310D/BnaA05g27100D/BnaA05g28760D/BnaA06g10160D/BnaA06g21690D/BnaA06g38830D/BnaA06g38840D/BnaA07g06110D/BnaA07g06860D/BnaA07g15310D/BnaA07g33460D/BnaA08g02260D/BnaA08g16610D/BnaA08g17280D/BnaA08g23820D/BnaA09g25200D/BnaA09g37880D/BnaA10g13230D/BnaA10g…	84
GO:0005635	nuclear envelope	74/12729	178/76374	3.5e-15	5.55e-14	3.35e-14	BnaA01g04030D/BnaA01g06280D/BnaA01g06290D/BnaA02g19480D/BnaA02g25030D/BnaA02g30700D/BnaA02g37010D/BnaA03g27950D/BnaA03g51080D/BnaA04g04890D/BnaA05g18320D/BnaA05g32120D/BnaA05g33430D/BnaA06g21290D/BnaA06g28940D/BnaA06g34560D/BnaA06g35580D/BnaA07g08680D/BnaA07g08920D/BnaA07g13170D/BnaA07g15960D/BnaA07g19980D/BnaA07g20390D/BnaA07g20620D/BnaA07g34180D/BnaA07g34790D/BnaA07g35420D/BnaA08g18670D/BnaA09g…	74
GO:0006338	chromatin remodeling	38/12729	62/76374	3.61e-15	5.68e-14	3.43e-14	BnaA01g15830D/BnaA02g09140D/BnaA03g18140D/BnaA03g21820D/BnaA04g19630D/BnaA04g27780D/BnaA05g00340D/BnaA05g26370D/BnaA05g35660D/BnaA06g01520D/BnaA06g15430D/BnaA07g16430D/BnaA08g21210D/BnaA08g27870D/BnaA09g34410D/BnaA10g02550D/BnaAnng21440D/BnaC01g18920D/BnaC01g35960D/BnaC01g35970D/BnaC02g13170D/BnaC03g21660D/BnaC03g26090D/BnaC03g69110D/BnaC03g71020D/BnaC04g26190D/BnaC04g44010D/BnaC05g02520D/BnaC05g…	38
GO:0016070	RNA metabolic process	51/12729	102/76374	8.88e-15	1.38e-13	8.35e-14	BnaA01g06380D/BnaA01g06390D/BnaA01g06460D/BnaA01g18930D/BnaA01g29600D/BnaA02g08040D/BnaA02g12240D/BnaA02g19360D/BnaA03g33200D/BnaA03g50480D/BnaA04g01300D/BnaA05g25370D/BnaA05g29040D/BnaA06g30900D/BnaA07g02560D/BnaA07g20800D/BnaA07g25380D/BnaA07g33730D/BnaA07g35190D/BnaA09g25980D/BnaA09g44310D/BnaA10g28550D/BnaAnng11960D/BnaAnng36690D/BnaAnng20280D/BnaAnng29900D/BnaC01g07660D/BnaC01g22760D/BnaC01g…	51
GO:0042593	glucose homeostasis	18/12729	18/76374	9.75e-15	1.5e-13	9.09e-14	BnaA01g19370D/BnaA02g35880D/BnaA06g13580D/BnaA06g13670D/BnaA07g21790D/BnaA07g31980D/BnaA08g10550D/BnaA08g29490D/BnaA09g15940D/BnaA09g44150D/BnaAnng38010D/BnaAnng04430D/BnaC02g40330D/BnaC06g22500D/BnaC06g35990D/BnaC08g36710D/BnaCnng44260D/BnaCnng08080D	18
GO:0005853	eukaryotic translation elongation factor 1 complex	22/12729	25/76374	1.02e-14	1.57e-13	9.46e-14	BnaA02g04260D/BnaA03g07610D/BnaA04g22570D/BnaA06g05540D/BnaA08g17480D/BnaA08g26240D/BnaA09g26340D/BnaA09g26350D/BnaA09g48380D/BnaA10g15620D/BnaA10g20560D/BnaC02g08760D/BnaC03g09630D/BnaC07g09120D/BnaC08g13770D/BnaC08g42630D/BnaC09g38180D/BnaC09g44570D/BnaC09g48780D/BnaCnng34540D/BnaCnng17800D/BnaCnng19790D	22
GO:0042752	regulation of circadian rhythm	62/12729	141/76374	2.64e-14	4.01e-13	2.42e-13	BnaA02g04940D/BnaA02g06500D/BnaA02g07010D/BnaA02g26750D/BnaA02g30480D/BnaA02g32550D/BnaA03g24400D/BnaA03g26120D/BnaA03g56030D/BnaA04g11980D/BnaA06g26980D/BnaA06g37360D/BnaA06g39620D/BnaA07g14790D/BnaA07g33370D/BnaA08g11670D/BnaA08g16920D/BnaA09g00890D/BnaA09g03180D/BnaA09g04840D/BnaA09g43400D/BnaA09g45180D/BnaA09g51080D/BnaA10g01560D/BnaA10g12530D/BnaA10g12930D/BnaA10g14910D/BnaA10g26930D/BnaAnng…	62
GO:0004540	ribonuclease activity	31/12729	46/76374	2.69e-14	4.05e-13	2.45e-13	BnaA02g05510D/BnaA02g18230D/BnaA02g19410D/BnaA03g08430D/BnaA05g17930D/BnaA05g35260D/BnaA06g00130D/BnaA06g10590D/BnaA06g38950D/BnaA07g04820D/BnaA07g04830D/BnaA07g35300D/BnaA09g49890D/BnaA10g14100D/BnaC02g09390D/BnaC02g46620D/BnaC03g10750D/BnaC03g54940D/BnaC04g12640D/BnaC04g12660D/BnaC05g12160D/BnaC05g24070D/BnaC05g28290D/BnaC05g37890D/BnaC06g40210D/BnaC08g44770D/BnaC08g44790D/BnaCnng25490D/BnaCnng…	31
GO:0008312	7S RNA binding	28/12729	39/76374	3.89e-14	5.8e-13	3.5e-13	BnaA02g33100D/BnaA05g17060D/BnaA06g03460D/BnaA06g09990D/BnaA06g21420D/BnaA07g24920D/BnaA07g24930D/BnaA07g26580D/BnaA08g02940D/BnaA08g02950D/BnaA08g03500D/BnaA10g26220D/BnaAnng40040D/BnaAnng00870D/BnaC02g02820D/BnaC02g02830D/BnaC02g29710D/BnaC03g52150D/BnaC05g11610D/BnaC05g25860D/BnaC06g01660D/BnaC06g02320D/BnaC06g26620D/BnaC06g26630D/BnaC06g28700D/BnaC08g03210D/BnaC08g03850D/BnaCnng10600D	28
GO:0003690	double-stranded DNA binding	43/12729	80/76374	4.04e-14	5.97e-13	3.61e-13	BnaA01g01560D/BnaA02g00870D/BnaA02g00880D/BnaA02g00920D/BnaA03g03240D/BnaA03g18380D/BnaA03g18390D/BnaA04g11900D/BnaA04g12350D/BnaA05g13070D/BnaA06g11440D/BnaA06g37560D/BnaA09g43450D/BnaA10g21200D/BnaA10g21260D/BnaA10g21270D/BnaAnng35580D/BnaAnng39360D/BnaAnng26260D/BnaAnng08360D/BnaAnng08850D/BnaAnng08880D/BnaC03g04670D/BnaC03g21900D/BnaC03g58390D/BnaC04g43400D/BnaC05g13070D/BnaC05g37790D/BnaC06g…	43
GO:0035145	exon-exon junction complex	17/12729	17/76374	5.86e-14	8.52e-13	5.14e-13	BnaA01g25900D/BnaA03g35410D/BnaA05g15240D/BnaA05g36790D/BnaA06g02320D/BnaA08g01960D/BnaA10g00050D/BnaAnng15580D/BnaC01g33090D/BnaC03g41130D/BnaC03g68820D/BnaC03g77820D/BnaC05g00070D/BnaC05g33010D/BnaC06g04600D/BnaC06g08860D/BnaCnng09170D	17
GO:0042256	mature ribosome assembly	17/12729	17/76374	5.86e-14	8.52e-13	5.14e-13	BnaA02g15960D/BnaA03g04430D/BnaA04g03450D/BnaA04g14320D/BnaA07g23080D/BnaA07g30140D/BnaA09g35240D/BnaA09g41430D/BnaC02g21380D/BnaC02g22690D/BnaC02g44920D/BnaC03g05950D/BnaC04g25350D/BnaC04g36490D/BnaC06g24350D/BnaC06g33580D/BnaC08g26570D	17
GO:0000148	1,3-beta-D-glucan synthase complex	33/12729	53/76374	1.22e-13	1.73e-12	1.04e-12	BnaA02g01360D/BnaA05g11020D/BnaA05g11050D/BnaA05g11060D/BnaA07g18170D/BnaA08g29750D/BnaA09g08350D/BnaA09g08360D/BnaA09g14070D/BnaA09g49880D/BnaA10g03730D/BnaA10g04230D/BnaA10g20270D/BnaC02g04450D/BnaC02g40760D/BnaC03g52310D/BnaC04g12720D/BnaC04g12780D/BnaC04g54260D/BnaC04g54270D/BnaC05g03680D/BnaC05g04460D/BnaC05g04470D/BnaC06g17090D/BnaC06g32300D/BnaC07g04420D/BnaC07g35600D/BnaC08g44800D/BnaC09g…	33
GO:0003843	1,3-beta-D-glucan synthase activity	33/12729	53/76374	1.22e-13	1.73e-12	1.04e-12	BnaA02g01360D/BnaA05g11020D/BnaA05g11050D/BnaA05g11060D/BnaA07g18170D/BnaA08g29750D/BnaA09g08350D/BnaA09g08360D/BnaA09g14070D/BnaA09g49880D/BnaA10g03730D/BnaA10g04230D/BnaA10g20270D/BnaC02g04450D/BnaC02g40760D/BnaC03g52310D/BnaC04g12720D/BnaC04g12780D/BnaC04g54260D/BnaC04g54270D/BnaC05g03680D/BnaC05g04460D/BnaC05g04470D/BnaC06g17090D/BnaC06g32300D/BnaC07g04420D/BnaC07g35600D/BnaC08g44800D/BnaC09g…	33
GO:0006075	(1->3)-beta-D-glucan biosynthetic process	33/12729	53/76374	1.22e-13	1.73e-12	1.04e-12	BnaA02g01360D/BnaA05g11020D/BnaA05g11050D/BnaA05g11060D/BnaA07g18170D/BnaA08g29750D/BnaA09g08350D/BnaA09g08360D/BnaA09g14070D/BnaA09g49880D/BnaA10g03730D/BnaA10g04230D/BnaA10g20270D/BnaC02g04450D/BnaC02g40760D/BnaC03g52310D/BnaC04g12720D/BnaC04g12780D/BnaC04g54260D/BnaC04g54270D/BnaC05g03680D/BnaC05g04460D/BnaC05g04470D/BnaC06g17090D/BnaC06g32300D/BnaC07g04420D/BnaC07g35600D/BnaC08g44800D/BnaC09g…	33
GO:0019901	protein kinase binding	72/12729	182/76374	1.64e-13	2.31e-12	1.39e-12	BnaA01g00430D/BnaA01g10100D/BnaA01g15250D/BnaA01g20940D/BnaA02g23750D/BnaA02g30350D/BnaA02g30360D/BnaA02g31220D/BnaA03g01900D/BnaA03g09570D/BnaA03g14370D/BnaA03g46850D/BnaA03g47830D/BnaA05g11560D/BnaA06g14500D/BnaA06g25730D/BnaA06g28650D/BnaA06g30080D/BnaA07g03310D/BnaA07g21450D/BnaA07g32610D/BnaA07g36800D/BnaA07g36600D/BnaA08g09280D/BnaA08g14490D/BnaA08g18850D/BnaA08g21740D/BnaA09g03810D/BnaA09g…	72
GO:0009789	positive regulation of abscisic acid-activated signaling pathway	51/12729	109/76374	2.55e-13	3.56e-12	2.15e-12	BnaA01g16740D/BnaA02g10420D/BnaA03g12450D/BnaA03g15290D/BnaA03g40850D/BnaA03g54310D/BnaA04g18810D/BnaA04g19180D/BnaA05g10480D/BnaA05g10900D/BnaA05g27620D/BnaA07g34200D/BnaA07g37150D/BnaA08g19440D/BnaA08g28040D/BnaA09g28590D/BnaA09g35190D/BnaA10g06520D/BnaAnng33670D/BnaAnng11720D/BnaAnng40310D/BnaAnng27960D/BnaAnng29990D/BnaAnng08250D/BnaC02g14540D/BnaC02g18580D/BnaC03g08210D/BnaC03g15210D/BnaC03g…	51
GO:0000339	RNA cap binding	16/12729	16/76374	3.52e-13	4.69e-12	2.83e-12	BnaA01g08910D/BnaA03g38370D/BnaA03g43550D/BnaA06g36240D/BnaA08g08530D/BnaA09g08310D/BnaC01g40840D/BnaC02g11410D/BnaC07g17720D/BnaC07g35030D/BnaC08g11130D/BnaC09g08560D/BnaC09g08570D/BnaC09g08580D/BnaCnng74830D/BnaUnng02290D	16
GO:0004742	dihydrolipoyllysine-residue acetyltransferase activity	16/12729	16/76374	3.52e-13	4.69e-12	2.83e-12	BnaA03g33170D/BnaA04g05600D/BnaA04g05610D/BnaA05g25500D/BnaA06g00560D/BnaA06g33300D/BnaA09g19620D/BnaAnng02240D/BnaC03g38230D/BnaC04g28350D/BnaC06g07040D/BnaC06g08280D/BnaC07g23030D/BnaC08g03220D/BnaC08g23510D/BnaCnng28440D	16
GO:0004748	ribonucleoside-diphosphate reductase activity, thioredoxin disulfide as acceptor	16/12729	16/76374	3.52e-13	4.69e-12	2.83e-12	BnaA02g28570D/BnaA06g32440D/BnaA07g06360D/BnaA08g16560D/BnaA09g16580D/BnaAnng05810D/BnaC01g30580D/BnaC02g36630D/BnaC03g59410D/BnaC03g59420D/BnaC03g60540D/BnaC07g07940D/BnaC07g18690D/BnaC07g48980D/BnaCnng75380D/BnaCnng78700D	16
GO:0005849	mRNA cleavage factor complex	16/12729	16/76374	3.52e-13	4.69e-12	2.83e-12	BnaA01g07160D/BnaA01g14790D/BnaA03g28730D/BnaA03g47500D/BnaA04g11670D/BnaA06g26770D/BnaA08g30980D/BnaC01g08640D/BnaC01g17430D/BnaC02g23020D/BnaC03g33850D/BnaC04g34150D/BnaC06g01980D/BnaC07g08330D/BnaC07g39750D/BnaC08g47260D	16
GO:0033597	mitotic checkpoint complex	16/12729	16/76374	3.52e-13	4.69e-12	2.83e-12	BnaA01g03590D/BnaA03g52090D/BnaA03g52440D/BnaA05g35020D/BnaA09g08730D/BnaC01g04930D/BnaC03g66690D/BnaC03g66700D/BnaC09g09010D/BnaC09g53600D/BnaC09g53610D/BnaCnng73980D/BnaCnng34290D/BnaCnng34300D/BnaCnng34310D/BnaCnng11300D	16
GO:0043631	RNA polyadenylation	16/12729	16/76374	3.52e-13	4.69e-12	2.83e-12	BnaA01g04100D/BnaA04g15160D/BnaA05g30810D/BnaA06g34850D/BnaA06g35040D/BnaA07g10940D/BnaA08g22830D/BnaA09g44760D/BnaC01g05560D/BnaC04g38120D/BnaC05g45260D/BnaC05g47890D/BnaC07g20650D/BnaC07g48830D/BnaC08g17680D/BnaC08g37460D	16
GO:0044030	regulation of DNA methylation	24/12729	32/76374	5.43e-13	7.18e-12	4.34e-12	BnaA03g18140D/BnaA03g36770D/BnaA04g27780D/BnaA05g16980D/BnaA05g35660D/BnaA06g01520D/BnaA07g16430D/BnaA07g37430D/BnaA09g34410D/BnaA09g52610D/BnaC01g35960D/BnaC01g35970D/BnaC03g21660D/BnaC03g42940D/BnaC03g69110D/BnaC04g26190D/BnaC05g29830D/BnaC06g05580D/BnaC06g15290D/BnaC06g41850D/BnaC07g16550D/BnaC08g25320D/BnaC09g07810D/BnaC09g24400D	24
GO:0006470	protein dephosphorylation	96/12729	280/76374	5.8e-13	7.62e-12	4.6e-12	BnaA01g15250D/BnaA01g20940D/BnaA01g23280D/BnaA01g35310D/BnaA01g37370D/BnaA02g01670D/BnaA02g07240D/BnaA03g04360D/BnaA03g09660D/BnaA03g21980D/BnaA03g24730D/BnaA03g47830D/BnaA04g01980D/BnaA05g12640D/BnaA05g12650D/BnaA05g22850D/BnaA05g27660D/BnaA06g06220D/BnaA06g11830D/BnaA06g11930D/BnaA07g00650D/BnaA07g10570D/BnaA07g17860D/BnaA07g17880D/BnaA07g22500D/BnaA07g30430D/BnaA07g38950D/BnaA08g14490D/BnaA08g…	96
GO:0050378	UDP-glucuronate 4-epimerase activity	17/12729	18/76374	8.88e-13	1.16e-11	7e-12	BnaA01g06610D/BnaA01g23480D/BnaA02g21470D/BnaA03g37120D/BnaA03g50170D/BnaA03g56770D/BnaA07g06190D/BnaA09g21060D/BnaAnng18570D/BnaC02g28500D/BnaC03g25270D/BnaC03g74010D/BnaC04g08650D/BnaC07g07730D/BnaC09g23320D/BnaCnng70410D/BnaCnng44170D	17
GO:0032040	small-subunit processome	22/12729	28/76374	9.97e-13	1.29e-11	7.8e-12	BnaA02g36530D/BnaA02g35820D/BnaA03g05840D/BnaA03g28000D/BnaA04g27370D/BnaA05g33460D/BnaA09g09030D/BnaA09g38450D/BnaA10g18170D/BnaA10g19010D/BnaC01g41990D/BnaC02g27370D/BnaC03g07580D/BnaC03g33030D/BnaC04g55100D/BnaC05g48210D/BnaC07g27900D/BnaC08g30590D/BnaC09g41680D/BnaC09g52780D/BnaCnng40350D/BnaCnng40370D	22
GO:0000419	RNA polymerase V complex	29/12729	45/76374	1.04e-12	1.33e-11	8.06e-12	BnaA01g17530D/BnaA03g18810D/BnaA04g23840D/BnaA05g14200D/BnaA06g00770D/BnaA06g07130D/BnaA07g04260D/BnaA08g01040D/BnaA08g25270D/BnaA09g02260D/BnaA09g08480D/BnaA09g22420D/BnaA09g36430D/BnaAnng40790D/BnaC03g69840D/BnaC03g72290D/BnaC04g26910D/BnaC04g32020D/BnaC04g47600D/BnaC07g04980D/BnaC07g04990D/BnaC08g10600D/BnaC08g14950D/BnaC08g28010D/BnaC09g01670D/BnaC09g24300D/BnaCnng38890D/BnaCnng39910D/BnaCnng…	29
GO:2000034	regulation of seed maturation	18/12729	20/76374	1.31e-12	1.68e-11	1.01e-11	BnaA03g08110D/BnaA03g13980D/BnaA04g17550D/BnaA05g11980D/BnaA07g08390D/BnaA08g18290D/BnaA09g27240D/BnaA10g00800D/BnaA10g14710D/BnaC03g10290D/BnaC03g16940D/BnaC03g58720D/BnaC04g14350D/BnaC04g41110D/BnaC05g00860D/BnaC05g21850D/BnaC07g10370D/BnaC09g37040D	18
GO:0000462	maturation of SSU-rRNA from tricistronic rRNA transcript (SSU-rRNA, 5.8S rRNA, LSU-rRNA)	15/12729	15/76374	2.11e-12	2.53e-11	1.53e-11	BnaA01g33350D/BnaA03g08070D/BnaA03g28860D/BnaA06g29060D/BnaA09g51640D/BnaA10g15110D/BnaAnng11460D/BnaAnng10730D/BnaC01g39840D/BnaC02g39500D/BnaC05g46950D/BnaC07g27610D/BnaC09g02910D/BnaC09g37460D/BnaCnng36150D	15
GO:0004353	glutamate dehydrogenase [NAD(P)+] activity	15/12729	15/76374	2.11e-12	2.53e-11	1.53e-11	BnaA01g33880D/BnaA03g02040D/BnaA05g37230D/BnaA10g16660D/BnaA10g23880D/BnaAnng13720D/BnaC01g40390D/BnaC02g01610D/BnaC03g03050D/BnaC05g31580D/BnaC05g47630D/BnaC05g47670D/BnaC09g03800D/BnaC09g39680D/BnaC09g47860D	15
GO:0005971	ribonucleoside-diphosphate reductase complex	15/12729	15/76374	2.11e-12	2.53e-11	1.53e-11	BnaA02g28570D/BnaA06g32440D/BnaA07g06360D/BnaA08g16560D/BnaA09g16580D/BnaAnng05810D/BnaC01g30580D/BnaC02g36630D/BnaC03g59420D/BnaC03g60540D/BnaC07g07940D/BnaC07g18690D/BnaC07g48980D/BnaCnng75380D/BnaCnng78700D	15
GO:0006407	rRNA export from nucleus	15/12729	15/76374	2.11e-12	2.53e-11	1.53e-11	BnaA03g01080D/BnaA04g14320D/BnaA06g23290D/BnaA07g30140D/BnaA09g06730D/BnaA10g26290D/BnaAnng00820D/BnaC02g02880D/BnaC02g22690D/BnaC03g01450D/BnaC03g50030D/BnaC04g36490D/BnaC06g33580D/BnaC09g06240D/BnaCnng10670D	15
GO:0006617	SRP-dependent cotranslational protein targeting to membrane, signal sequence recognition	15/12729	15/76374	2.11e-12	2.53e-11	1.53e-11	BnaA05g17060D/BnaA06g03460D/BnaA06g09990D/BnaA08g02940D/BnaA08g02950D/BnaA10g26220D/BnaAnng00870D/BnaC02g02820D/BnaC02g02830D/BnaC02g29710D/BnaC05g11610D/BnaC05g25860D/BnaC06g02320D/BnaC08g03210D/BnaCnng10600D	15
GO:0008909	isochorismate synthase activity	15/12729	15/76374	2.11e-12	2.53e-11	1.53e-11	BnaA06g08060D/BnaA06g13060D/BnaA07g22090D/BnaA08g22340D/BnaC02g40220D/BnaC05g14570D/BnaC05g19790D/BnaC06g04430D/BnaC06g22820D/BnaC06g35540D/BnaC07g12250D/BnaC08g18420D/BnaC08g37000D/BnaC08g48240D/BnaCnng08300D	15
GO:0017070	U6 snRNA binding	15/12729	15/76374	2.11e-12	2.53e-11	1.53e-11	BnaA01g10280D/BnaA04g18070D/BnaA05g06280D/BnaA05g16620D/BnaA07g38260D/BnaA09g20860D/BnaAnng20340D/BnaC01g41280D/BnaC04g06500D/BnaC04g06510D/BnaC04g06520D/BnaC08g04400D/BnaCnng53380D/BnaCnng15380D/BnaUnng01510D	15
GO:0030623	U5 snRNA binding	15/12729	15/76374	2.11e-12	2.53e-11	1.53e-11	BnaA01g10280D/BnaA04g18070D/BnaA05g06280D/BnaA05g16620D/BnaA07g38260D/BnaA09g20860D/BnaAnng20340D/BnaC01g41280D/BnaC04g06500D/BnaC04g06510D/BnaC04g06520D/BnaC08g04400D/BnaCnng53380D/BnaCnng15380D/BnaUnng01510D	15
GO:0080165	callose deposition in phloem sieve plate	15/12729	15/76374	2.11e-12	2.53e-11	1.53e-11	BnaA05g12940D/BnaA07g18170D/BnaA07g22680D/BnaA07g30830D/BnaA09g49880D/BnaA10g04230D/BnaC05g04460D/BnaC05g04470D/BnaC06g12120D/BnaC06g17090D/BnaC06g23590D/BnaC06g32300D/BnaC06g34330D/BnaC08g44800D/BnaCnng74430D	15
GO:0051082	unfolded protein binding	116/12729	370/76374	2.43e-12	2.89e-11	1.75e-11	BnaA01g00190D/BnaA01g08430D/BnaA01g11090D/BnaA01g13780D/BnaA01g13790D/BnaA01g25680D/BnaA01g26860D/BnaA01g33840D/BnaA02g00030D/BnaA02g00050D/BnaA02g05110D/BnaA02g05430D/BnaA03g01380D/BnaA03g03740D/BnaA03g05820D/BnaA03g08140D/BnaA03g08370D/BnaA03g28450D/BnaA03g29270D/BnaA03g31970D/BnaA03g35570D/BnaA03g46660D/BnaA03g49290D/BnaA03g55950D/BnaA04g06440D/BnaA05g12000D/BnaA05g19100D/BnaA05g21950D/BnaA05g…	116
GO:0005834	heterotrimeric G-protein complex	88/12729	254/76374	2.7e-12	3.19e-11	1.93e-11	BnaA01g03590D/BnaA01g12560D/BnaA01g13120D/BnaA01g18480D/BnaA01g20690D/BnaA01g26980D/BnaA02g13180D/BnaA03g04530D/BnaA03g11830D/BnaA03g13670D/BnaA03g24910D/BnaA03g39850D/BnaA03g52090D/BnaA03g52440D/BnaA04g03530D/BnaA04g17210D/BnaA05g03540D/BnaA05g12310D/BnaA05g22070D/BnaA05g33950D/BnaA05g35020D/BnaA06g03620D/BnaA06g12310D/BnaA06g16110D/BnaA06g23680D/BnaA07g18500D/BnaA07g26450D/BnaA08g03490D/BnaA08g…	88
GO:0006281	DNA repair	116/12729	371/76374	2.96e-12	3.47e-11	2.1e-11	BnaA01g15300D/BnaA01g19000D/BnaA01g19030D/BnaA01g21040D/BnaA02g28570D/BnaA03g00430D/BnaA03g04760D/BnaA03g19480D/BnaA03g21080D/BnaA04g01210D/BnaA04g11880D/BnaA04g19110D/BnaA04g23940D/BnaA05g07800D/BnaA05g27370D/BnaA05g29240D/BnaA05g34990D/BnaA06g07950D/BnaA06g17760D/BnaA06g32440D/BnaA06g32720D/BnaA07g01200D/BnaA07g06360D/BnaA07g07810D/BnaA07g17090D/BnaA07g20500D/BnaA07g33020D/BnaA07g37990D/BnaA07g…	116
GO:0009739	response to gibberellin	117/12729	376/76374	3.4e-12	3.96e-11	2.39e-11	BnaA01g19130D/BnaA01g29790D/BnaA02g02580D/BnaA02g15320D/BnaA02g29490D/BnaA03g02170D/BnaA03g05370D/BnaA03g09270D/BnaA03g14350D/BnaA03g16870D/BnaA03g17330D/BnaA03g24010D/BnaA03g40190D/BnaA03g40850D/BnaA05g01050D/BnaA05g05710D/BnaA05g06890D/BnaA05g07510D/BnaA05g09110D/BnaA05g12950D/BnaA05g13730D/BnaA05g25530D/BnaA06g02820D/BnaA06g12690D/BnaA06g12700D/BnaA06g24750D/BnaA06g24760D/BnaA06g31220D/BnaA06g…	117
GO:0004066	asparagine synthase (glutamine-hydrolyzing) activity	20/12729	25/76374	6.06e-12	7.02e-11	4.24e-11	BnaA03g02840D/BnaA03g40710D/BnaA04g05900D/BnaA06g17510D/BnaA06g20540D/BnaA06g23950D/BnaA09g12410D/BnaA10g29020D/BnaC03g04190D/BnaC03g14950D/BnaC03g49300D/BnaC03g51880D/BnaC03g53730D/BnaC03g75390D/BnaC04g03150D/BnaC07g34700D/BnaC07g35580D/BnaC09g04980D/BnaC09g12810D/BnaCnng72260D	20
GO:0005677	chromatin silencing complex	27/12729	42/76374	6.87e-12	7.91e-11	4.78e-11	BnaA01g06810D/BnaA01g18110D/BnaA02g07770D/BnaA02g08140D/BnaA03g09860D/BnaA03g58630D/BnaA05g22000D/BnaA07g05640D/BnaA07g05650D/BnaA08g08130D/BnaA08g13150D/BnaA10g29210D/BnaAnng10940D/BnaAnng11080D/BnaC01g08200D/BnaC01g21540D/BnaC02g10840D/BnaC03g12490D/BnaC03g12980D/BnaC03g68030D/BnaC03g74580D/BnaC05g49460D/BnaC07g07230D/BnaC08g10770D/BnaC08g48270D/BnaC09g33680D/BnaCnng18840D	27
GO:0005719	nuclear euchromatin	17/12729	19/76374	7.11e-12	8.08e-11	4.88e-11	BnaA02g29370D/BnaA03g02430D/BnaA03g24480D/BnaA03g24490D/BnaA04g15560D/BnaA06g31340D/BnaA07g13010D/BnaA09g22410D/BnaC02g37430D/BnaC03g29110D/BnaC04g38560D/BnaC04g54830D/BnaC04g56440D/BnaC07g25280D/BnaCnng25210D/BnaCnng25220D/BnaCnng25230D	17
GO:0019789	SUMO transferase activity	17/12729	19/76374	7.11e-12	8.08e-11	4.88e-11	BnaA01g13200D/BnaA02g06350D/BnaA04g02190D/BnaA04g27280D/BnaA06g38830D/BnaA06g38840D/BnaA07g17510D/BnaA10g13230D/BnaAnng34240D/BnaC01g24100D/BnaC03g55290D/BnaC04g21410D/BnaC04g23980D/BnaC05g27450D/BnaC06g16140D/BnaC08g28860D/BnaCnng38760D	17
GO:0016571	histone methylation	80/12729	228/76374	1.24e-11	1.34e-10	8.12e-11	BnaA01g04030D/BnaA01g14860D/BnaA01g16980D/BnaA01g35820D/BnaA02g10840D/BnaA03g01920D/BnaA03g19480D/BnaA03g27830D/BnaA03g47570D/BnaA04g23940D/BnaA04g23970D/BnaA04g25980D/BnaA05g02230D/BnaA05g04460D/BnaA05g06130D/BnaA05g28820D/BnaA06g02150D/BnaA06g34560D/BnaA07g10750D/BnaA07g25370D/BnaA08g01820D/BnaA08g08130D/BnaA08g13850D/BnaA08g27000D/BnaA08g28200D/BnaA08g31010D/BnaA09g14430D/BnaA09g14440D/BnaA09g…	80
GO:0000152	nuclear ubiquitin ligase complex	14/12729	14/76374	1.27e-11	1.34e-10	8.12e-11	BnaA01g33280D/BnaA02g29720D/BnaA03g27640D/BnaA04g19110D/BnaA05g34100D/BnaA05g34990D/BnaA06g31030D/BnaC02g37730D/BnaC03g18300D/BnaC04g11750D/BnaC04g43440D/BnaC05g48600D/BnaC07g25610D/BnaCnng29110D	14
GO:0008469	histone-arginine N-methyltransferase activity	14/12729	14/76374	1.27e-11	1.34e-10	8.12e-11	BnaA02g30530D/BnaA05g30580D/BnaA06g29740D/BnaA07g04710D/BnaAnng36410D/BnaAnng21610D/BnaC02g38900D/BnaC03g34160D/BnaC03g76770D/BnaC03g76780D/BnaC05g45040D/BnaC05g49560D/BnaC07g27000D/BnaCnng71640D	14
GO:0016048	detection of temperature stimulus	14/12729	14/76374	1.27e-11	1.34e-10	8.12e-11	BnaA03g18140D/BnaA04g27780D/BnaA05g35660D/BnaA06g01520D/BnaA07g16430D/BnaA09g34410D/BnaC03g21660D/BnaC03g69110D/BnaC04g26190D/BnaC06g05580D/BnaC06g15290D/BnaC06g41850D/BnaC08g25320D/BnaC09g24400D	14
GO:0016277	[myelin basic protein]-arginine N-methyltransferase activity	14/12729	14/76374	1.27e-11	1.34e-10	8.12e-11	BnaA02g30530D/BnaA05g30580D/BnaA06g29740D/BnaA07g04710D/BnaAnng36410D/BnaAnng21610D/BnaC02g38900D/BnaC03g34160D/BnaC03g76770D/BnaC03g76780D/BnaC05g45040D/BnaC05g49560D/BnaC07g27000D/BnaCnng71640D	14
GO:0019919	peptidyl-arginine methylation, to asymmetrical-dimethyl arginine	14/12729	14/76374	1.27e-11	1.34e-10	8.12e-11	BnaA02g30530D/BnaA05g30580D/BnaA06g29740D/BnaA07g04710D/BnaAnng36410D/BnaAnng21610D/BnaC02g38900D/BnaC03g34160D/BnaC03g76770D/BnaC03g76780D/BnaC05g45040D/BnaC05g49560D/BnaC07g27000D/BnaCnng71640D	14
GO:0030686	90S preribosome	14/12729	14/76374	1.27e-11	1.34e-10	8.12e-11	BnaA03g05840D/BnaA03g28000D/BnaA04g14320D/BnaA05g33460D/BnaA07g30140D/BnaA10g18170D/BnaC01g41990D/BnaC02g22690D/BnaC03g07580D/BnaC03g33030D/BnaC04g36490D/BnaC05g48210D/BnaC06g33580D/BnaC09g41680D	14
GO:0035241	protein-arginine omega-N monomethyltransferase activity	14/12729	14/76374	1.27e-11	1.34e-10	8.12e-11	BnaA02g30530D/BnaA05g30580D/BnaA06g29740D/BnaA07g04710D/BnaAnng36410D/BnaAnng21610D/BnaC02g38900D/BnaC03g34160D/BnaC03g76770D/BnaC03g76780D/BnaC05g45040D/BnaC05g49560D/BnaC07g27000D/BnaCnng71640D	14
GO:0035242	protein-arginine omega-N asymmetric methyltransferase activity	14/12729	14/76374	1.27e-11	1.34e-10	8.12e-11	BnaA02g30530D/BnaA05g30580D/BnaA06g29740D/BnaA07g04710D/BnaAnng36410D/BnaAnng21610D/BnaC02g38900D/BnaC03g34160D/BnaC03g76770D/BnaC03g76780D/BnaC05g45040D/BnaC05g49560D/BnaC07g27000D/BnaCnng71640D	14
GO:2001147	camalexin binding	14/12729	14/76374	1.27e-11	1.34e-10	8.12e-11	BnaA02g20640D/BnaA03g26130D/BnaA03g26140D/BnaA08g27280D/BnaA09g00850D/BnaA09g00870D/BnaA10g01510D/BnaC03g30870D/BnaC03g30880D/BnaC05g01540D/BnaC08g00080D/BnaCnng47740D/BnaCnng19060D/BnaCnng19070D	14
GO:2001227	quercitrin binding	14/12729	14/76374	1.27e-11	1.34e-10	8.12e-11	BnaA02g20640D/BnaA03g26130D/BnaA03g26140D/BnaA08g27280D/BnaA09g00850D/BnaA09g00870D/BnaA10g01510D/BnaC03g30870D/BnaC03g30880D/BnaC05g01540D/BnaC08g00080D/BnaCnng47740D/BnaCnng19060D/BnaCnng19070D	14
GO:0009451	RNA modification	35/12729	66/76374	1.54e-11	1.62e-10	9.78e-11	BnaA02g05510D/BnaA02g19410D/BnaA03g03170D/BnaA03g08430D/BnaA05g17930D/BnaA05g24550D/BnaA05g35260D/BnaA06g00130D/BnaA06g10590D/BnaA06g38950D/BnaA07g04820D/BnaA07g04830D/BnaA07g35300D/BnaA09g49890D/BnaA10g14100D/BnaA10g21450D/BnaC02g09390D/BnaC02g46620D/BnaC03g04600D/BnaC03g10750D/BnaC03g54940D/BnaC04g12640D/BnaC04g12660D/BnaC05g12160D/BnaC05g24070D/BnaC05g28290D/BnaC05g37890D/BnaC05g38550D/BnaC06g…	35
GO:0006809	nitric oxide biosynthetic process	20/12729	26/76374	2.21e-11	2.32e-10	1.4e-10	BnaA02g18610D/BnaA03g13610D/BnaA04g17180D/BnaA07g20840D/BnaA07g33680D/BnaA07g33690D/BnaA08g06940D/BnaA10g04620D/BnaC02g30690D/BnaC03g71910D/BnaC04g40780D/BnaC05g04970D/BnaC05g24350D/BnaC05g28860D/BnaC06g20690D/BnaC06g38300D/BnaCnng35930D/BnaCnng35940D/BnaCnng53220D/BnaCnng60930D	20
GO:0000287	magnesium ion binding	126/12729	427/76374	2.86e-11	2.98e-10	1.8e-10	BnaA01g20680D/BnaA01g24280D/BnaA01g37400D/BnaA01g37380D/BnaA02g01720D/BnaA02g14110D/BnaA02g35070D/BnaA03g02560D/BnaA03g10210D/BnaA03g10910D/BnaA03g16750D/BnaA03g19950D/BnaA03g26470D/BnaA03g28460D/BnaA03g36910D/BnaA03g50340D/BnaA03g51770D/BnaA03g52820D/BnaA03g56470D/BnaA04g02300D/BnaA04g05070D/BnaA04g26810D/BnaA05g01040D/BnaA05g03160D/BnaA05g07770D/BnaA05g12480D/BnaA05g20880D/BnaA05g35800D/BnaA05g…	126
GO:0000164	protein phosphatase type 1 complex	19/12729	24/76374	2.92e-11	3.02e-10	1.83e-10	BnaA02g07240D/BnaA03g09660D/BnaA03g21980D/BnaA04g18120D/BnaA05g11440D/BnaA05g11590D/BnaA05g12640D/BnaA09g11370D/BnaA10g12190D/BnaAnng38310D/BnaC02g10230D/BnaC03g12200D/BnaC03g26300D/BnaC03g56150D/BnaC04g14080D/BnaC04g27220D/BnaC04g42180D/BnaC09g11810D/BnaC09g34410D	19
GO:0010074	maintenance of meristem identity	53/12729	128/76374	3.16e-11	3.25e-10	1.96e-10	BnaA01g04030D/BnaA01g16980D/BnaA01g35820D/BnaA02g00920D/BnaA02g01670D/BnaA02g30530D/BnaA03g01920D/BnaA03g04360D/BnaA03g51290D/BnaA04g25980D/BnaA05g00970D/BnaA05g04460D/BnaA06g18830D/BnaA06g29740D/BnaA06g34560D/BnaA07g04710D/BnaA08g12690D/BnaA08g13850D/BnaA09g08880D/BnaA09g14430D/BnaA09g14440D/BnaA09g15510D/BnaA10g21200D/BnaAnng01630D/BnaC01g05330D/BnaC01g07310D/BnaC01g14560D/BnaC01g28350D/BnaC02g…	53
GO:0071493	cellular response to UV-B	18/12729	22/76374	3.59e-11	3.67e-10	2.22e-10	BnaA02g14510D/BnaA04g16310D/BnaA06g05150D/BnaA06g09110D/BnaA08g24040D/BnaA09g45620D/BnaA09g48720D/BnaA10g16720D/BnaC02g19510D/BnaC03g51730D/BnaC04g39580D/BnaC05g06430D/BnaC05g10550D/BnaC06g43320D/BnaC08g16090D/BnaC08g39710D/BnaC08g42970D/BnaC09g39740D	18
GO:0007346	regulation of mitotic cell cycle	44/12729	97/76374	3.91e-11	3.97e-10	2.4e-10	BnaA01g27710D/BnaA02g31520D/BnaA03g24480D/BnaA03g24490D/BnaA03g29200D/BnaA03g34250D/BnaA03g41160D/BnaA03g41170D/BnaA05g00050D/BnaA05g00070D/BnaA05g23180D/BnaA06g27440D/BnaA06g28240D/BnaA07g00690D/BnaA07g00700D/BnaA07g13040D/BnaA08g00600D/BnaA09g04710D/BnaA09g22410D/BnaA09g54650D/BnaA10g17060D/BnaAnng15950D/BnaAnng21040D/BnaC01g23510D/BnaC01g35230D/BnaC01g35260D/BnaC03g29110D/BnaC03g39720D/BnaC03g…	44
GO:0004364	glutathione transferase activity	62/12729	162/76374	3.95e-11	4e-10	2.42e-10	BnaA02g03440D/BnaA02g20640D/BnaA02g26370D/BnaA03g14140D/BnaA03g14150D/BnaA03g26130D/BnaA03g26140D/BnaA04g00390D/BnaA04g11010D/BnaA04g17910D/BnaA05g00270D/BnaA05g32420D/BnaA06g25810D/BnaA06g34160D/BnaA07g15320D/BnaA08g27280D/BnaA09g00850D/BnaA09g00860D/BnaA09g00870D/BnaA09g08250D/BnaA09g19060D/BnaA09g51100D/BnaA10g01510D/BnaA10g01520D/BnaA10g01530D/BnaA10g01540D/BnaA10g01550D/BnaA10g17440D/BnaAnng…	62
GO:0000327	lytic vacuole within protein storage vacuole	13/12729	13/76374	7.62e-11	7.53e-10	4.55e-10	BnaA02g18300D/BnaA02g18370D/BnaA06g15500D/BnaA07g10870D/BnaA07g33590D/BnaA08g21180D/BnaC05g17110D/BnaC06g20960D/BnaC06g38200D/BnaC07g14260D/BnaC08g19950D/BnaCnng09890D/BnaCnng11500D	13
GO:0010265	SCF complex assembly	13/12729	13/76374	7.62e-11	7.53e-10	4.55e-10	BnaA03g26120D/BnaA07g14790D/BnaA08g11670D/BnaA09g00890D/BnaA09g51080D/BnaA10g01560D/BnaC02g27020D/BnaC03g30850D/BnaC03g77150D/BnaC05g01600D/BnaC06g12710D/BnaC09g00020D/BnaCnng78460D	13
GO:0010445	nuclear dicing body	13/12729	13/76374	7.62e-11	7.53e-10	4.55e-10	BnaA03g08110D/BnaA06g05600D/BnaA07g13040D/BnaA08g26200D/BnaA10g00800D/BnaA10g14710D/BnaC03g10290D/BnaC04g17070D/BnaC04g38630D/BnaC05g00860D/BnaC05g07140D/BnaC08g13800D/BnaC09g37040D	13
GO:0010495	long-distance posttranscriptional gene silencing	13/12729	13/76374	7.62e-11	7.53e-10	4.55e-10	BnaA03g02430D/BnaA03g54760D/BnaA04g15560D/BnaA07g13010D/BnaA09g10720D/BnaA09g22040D/BnaC04g20180D/BnaC04g38560D/BnaC04g54830D/BnaC04g56440D/BnaC09g51200D/BnaCnng57100D/BnaCnng59660D	13
GO:0009225	nucleotide-sugar metabolic process	28/12729	48/76374	8.08e-11	7.95e-10	4.8e-10	BnaA01g06610D/BnaA01g10650D/BnaA01g23480D/BnaA02g21470D/BnaA03g37120D/BnaA03g50170D/BnaA03g56770D/BnaA05g09030D/BnaA07g06190D/BnaA09g17150D/BnaA09g21060D/BnaA09g25900D/BnaAnng39400D/BnaAnng18570D/BnaAnng10090D/BnaC01g12180D/BnaC02g28500D/BnaC03g25270D/BnaC03g74010D/BnaC04g08650D/BnaC05g23640D/BnaC07g07730D/BnaC07g18010D/BnaC09g18390D/BnaC09g23320D/BnaCnng22570D/BnaCnng70410D/BnaCnng44170D	28
GO:0031087	deadenylation-independent decapping of nuclear-transcribed mRNA	22/12729	32/76374	8.55e-11	8.36e-10	5.05e-10	BnaA02g01720D/BnaA06g04810D/BnaA07g37100D/BnaA08g19570D/BnaA08g27050D/BnaA09g15880D/BnaA09g48930D/BnaA10g19790D/BnaAnng28130D/BnaC02g04850D/BnaC03g05960D/BnaC04g32430D/BnaC05g06060D/BnaC07g11970D/BnaC08g18030D/BnaC08g43210D/BnaC09g16680D/BnaC09g43520D/BnaCnng27110D/BnaCnng29620D/BnaCnng14330D/BnaCnng14350D	22
GO:0009616	virus induced gene silencing	131/12729	456/76374	8.61e-11	8.37e-10	5.06e-10	BnaA01g10280D/BnaA01g25700D/BnaA01g27140D/BnaA01g35370D/BnaA02g01360D/BnaA02g29370D/BnaA02g32860D/BnaA03g02430D/BnaA03g08110D/BnaA03g18330D/BnaA03g35550D/BnaA03g35810D/BnaA03g37310D/BnaA03g39050D/BnaA03g50840D/BnaA03g54760D/BnaA04g15560D/BnaA04g18070D/BnaA04g26020D/BnaA05g06270D/BnaA05g06280D/BnaA05g11420D/BnaA05g16620D/BnaA05g18140D/BnaA05g19140D/BnaA05g20380D/BnaA05g22290D/BnaA06g02830D/BnaA06g…	131
GO:0019904	protein domain specific binding	29/12729	52/76374	1.67e-10	1.62e-09	9.76e-10	BnaA02g00540D/BnaA03g02930D/BnaA03g27950D/BnaA05g01050D/BnaA05g18320D/BnaA05g33430D/BnaA07g10500D/BnaA07g10560D/BnaA07g20620D/BnaA07g34180D/BnaA08g20850D/BnaAnng02090D/BnaAnng29600D/BnaC02g00320D/BnaC02g24950D/BnaC03g04330D/BnaC03g32980D/BnaC04g00590D/BnaC04g02240D/BnaC05g17440D/BnaC05g27930D/BnaC06g20480D/BnaC06g38800D/BnaC07g13790D/BnaC07g13820D/BnaC08g05920D/BnaC08g05950D/BnaC09g46090D/BnaCnng…	29
GO:0042803	protein homodimerization activity	136/12729	483/76374	1.7e-10	1.64e-09	9.88e-10	BnaA01g05410D/BnaA01g05490D/BnaA01g14770D/BnaA01g14780D/BnaA01g16510D/BnaA02g01520D/BnaA02g01720D/BnaA02g30530D/BnaA03g04250D/BnaA03g16450D/BnaA03g17330D/BnaA03g18380D/BnaA03g18390D/BnaA03g18840D/BnaA03g48640D/BnaA04g12350D/BnaA04g15690D/BnaA04g20970D/BnaA04g22640D/BnaA04g25980D/BnaA05g04460D/BnaA05g05560D/BnaA05g06890D/BnaA05g08310D/BnaA05g13730D/BnaA05g28760D/BnaA05g30580D/BnaA05g33840D/BnaA06g…	136
GO:0003697	single-stranded DNA binding	42/12729	94/76374	1.94e-10	1.85e-09	1.12e-09	BnaA01g01560D/BnaA01g26670D/BnaA02g00870D/BnaA02g00880D/BnaA03g03240D/BnaA03g18380D/BnaA03g18390D/BnaA03g44350D/BnaA04g10900D/BnaA04g11900D/BnaA04g12350D/BnaA05g13070D/BnaA05g21580D/BnaA09g43450D/BnaA10g05230D/BnaA10g21260D/BnaA10g21270D/BnaAnng35580D/BnaAnng39360D/BnaAnng26260D/BnaAnng08360D/BnaAnng08850D/BnaAnng08880D/BnaC01g34060D/BnaC03g04670D/BnaC03g21900D/BnaC04g33140D/BnaC04g43400D/BnaC05g…	42
GO:0003725	double-stranded RNA binding	39/12729	84/76374	2.08e-10	1.98e-09	1.2e-09	BnaA01g11500D/BnaA02g00870D/BnaA02g00880D/BnaA03g03240D/BnaA03g08110D/BnaA03g44810D/BnaA06g03600D/BnaA06g05600D/BnaA06g19710D/BnaA06g35130D/BnaA06g37560D/BnaA08g09620D/BnaA08g26200D/BnaA10g00800D/BnaA10g14710D/BnaA10g21260D/BnaA10g21270D/BnaA10g25360D/BnaAnng39360D/BnaC03g04670D/BnaC03g10290D/BnaC03g54010D/BnaC03g58390D/BnaC03g64030D/BnaC04g43400D/BnaC05g00860D/BnaC05g07140D/BnaC05g37790D/BnaC06g…	39
GO:0005622	intracellular	93/12729	296/76374	2.96e-10	2.8e-09	1.69e-09	BnaA01g01450D/BnaA01g16250D/BnaA01g27930D/BnaA01g28590D/BnaA02g03070D/BnaA02g03790D/BnaA02g14660D/BnaA03g03260D/BnaA03g04650D/BnaA03g06050D/BnaA03g14540D/BnaA03g16890D/BnaA03g39880D/BnaA03g46200D/BnaA03g56180D/BnaA03g57490D/BnaA03g60650D/BnaA04g18800D/BnaA05g07490D/BnaA05g10860D/BnaA05g12780D/BnaA05g22640D/BnaA06g02900D/BnaA06g03600D/BnaA06g08350D/BnaA06g36440D/BnaA07g27780D/BnaA08g09220D/BnaA08g…	93
GO:0019199	transmembrane receptor protein kinase activity	19/12729	26/76374	3.21e-10	3e-09	1.81e-09	BnaA06g17550D/BnaA09g37750D/BnaA09g37760D/BnaA09g40540D/BnaA10g14990D/BnaA10g23720D/BnaC02g00100D/BnaC03g10100D/BnaC03g52630D/BnaC03g56440D/BnaC06g17320D/BnaC08g32980D/BnaC08g33020D/BnaC08g48950D/BnaC08g48960D/BnaC09g37350D/BnaC09g42400D/BnaC09g45630D/BnaC09g48450D	19
GO:0042754	negative regulation of circadian rhythm	19/12729	26/76374	3.21e-10	3e-09	1.81e-09	BnaA03g18380D/BnaA03g18390D/BnaA04g12350D/BnaA05g01050D/BnaA10g00780D/BnaAnng35580D/BnaAnng17890D/BnaC03g00040D/BnaC03g21900D/BnaC04g00590D/BnaC05g00840D/BnaC07g02670D/BnaC07g02690D/BnaC07g08560D/BnaC08g49360D/BnaCnng45140D/BnaCnng45150D/BnaCnng45160D/BnaUnng05060D	19
GO:0007267	cell-cell signaling	108/12729	362/76374	3.51e-10	3.27e-09	1.97e-09	BnaA01g10280D/BnaA01g25700D/BnaA01g27140D/BnaA01g35370D/BnaA02g01360D/BnaA02g29370D/BnaA03g02430D/BnaA03g08110D/BnaA03g18330D/BnaA03g35550D/BnaA03g35810D/BnaA03g37310D/BnaA03g39050D/BnaA03g54760D/BnaA04g15560D/BnaA04g18070D/BnaA04g23970D/BnaA04g26020D/BnaA05g02230D/BnaA05g06270D/BnaA05g06280D/BnaA05g11420D/BnaA05g16620D/BnaA05g18140D/BnaA05g19140D/BnaA05g20380D/BnaA05g22290D/BnaA06g02830D/BnaA06g…	108
GO:0004534	5'-3' exoribonuclease activity	12/12729	12/76374	4.57e-10	4.01e-09	2.42e-09	BnaA02g17350D/BnaA06g37110D/BnaA09g15880D/BnaAnng09050D/BnaC02g23590D/BnaC02g25530D/BnaC06g36330D/BnaC08g03500D/BnaC08g18030D/BnaC09g09280D/BnaC09g16680D/BnaCnng37390D	12
GO:0004652	polynucleotide adenylyltransferase activity	12/12729	12/76374	4.57e-10	4.01e-09	2.42e-09	BnaA01g04100D/BnaA04g15160D/BnaA05g30810D/BnaA08g22830D/BnaA09g44760D/BnaC01g05560D/BnaC04g38120D/BnaC05g45260D/BnaC07g20650D/BnaC07g48830D/BnaC08g17680D/BnaC08g37460D	12
GO:0004735	pyrroline-5-carboxylate reductase activity	12/12729	12/76374	4.57e-10	4.01e-09	2.42e-09	BnaA03g05080D/BnaA10g19050D/BnaC03g06620D/BnaC03g63470D/BnaC04g11450D/BnaC04g12260D/BnaC04g18790D/BnaC04g18800D/BnaC06g16280D/BnaC06g16290D/BnaC08g05470D/BnaC09g42740D	12
GO:0004824	lysine-tRNA ligase activity	12/12729	12/76374	4.57e-10	4.01e-09	2.42e-09	BnaA03g31900D/BnaA03g32860D/BnaA05g25810D/BnaA05g27370D/BnaA10g30390D/BnaAnng09520D/BnaAnng09530D/BnaC01g37600D/BnaC03g73420D/BnaC05g39850D/BnaC05g41490D/BnaC09g49130D	12
GO:0005366	myo-inositol:proton symporter activity	12/12729	12/76374	4.57e-10	4.01e-09	2.42e-09	BnaA03g42620D/BnaA04g20750D/BnaA04g25030D/BnaA05g03260D/BnaA08g17490D/BnaAnng37910D/BnaC04g02870D/BnaC04g48870D/BnaC04g56490D/BnaC07g33720D/BnaCnng73380D/BnaCnng34530D	12
GO:0006430	lysyl-tRNA aminoacylation	12/12729	12/76374	4.57e-10	4.01e-09	2.42e-09	BnaA03g31900D/BnaA03g32860D/BnaA05g25810D/BnaA05g27370D/BnaA10g30390D/BnaAnng09520D/BnaAnng09530D/BnaC01g37600D/BnaC03g73420D/BnaC05g39850D/BnaC05g41490D/BnaC09g49130D	12
GO:0009943	adaxial/abaxial axis specification	12/12729	12/76374	4.57e-10	4.01e-09	2.42e-09	BnaA03g16620D/BnaA03g22070D/BnaA04g01020D/BnaA04g16520D/BnaA07g18850D/BnaA09g33180D/BnaAnng07500D/BnaC03g26450D/BnaC04g39860D/BnaC06g14080D/BnaC08g23970D/BnaCnng65040D	12
GO:0016514	SWI/SNF complex	12/12729	12/76374	4.57e-10	4.01e-09	2.42e-09	BnaA03g21820D/BnaA04g19630D/BnaA05g00340D/BnaA05g26370D/BnaA06g15430D/BnaA08g21210D/BnaAnng21440D/BnaC03g26090D/BnaC04g44010D/BnaC05g17030D/BnaC08g48430D/BnaCnng23620D	12
GO:0050373	UDP-arabinose 4-epimerase activity	12/12729	12/76374	4.57e-10	4.01e-09	2.42e-09	BnaA05g09030D/BnaA06g38100D/BnaA08g24600D/BnaA09g10850D/BnaA09g25900D/BnaC05g23640D/BnaC05g49280D/BnaC07g18040D/BnaC08g15730D/BnaCnng21690D/BnaCnng22570D/BnaCnng14830D	12
GO:0050691	regulation of defense response to virus by host	12/12729	12/76374	4.57e-10	4.01e-09	2.42e-09	BnaA01g05060D/BnaA07g20110D/BnaA07g35260D/BnaAnng23990D/BnaAnng32610D/BnaC01g06660D/BnaC02g26030D/BnaC03g67380D/BnaC04g12070D/BnaC06g19560D/BnaC06g40170D/BnaC09g05770D	12
GO:0055129	L-proline biosynthetic process	12/12729	12/76374	4.57e-10	4.01e-09	2.42e-09	BnaA03g05080D/BnaA10g19050D/BnaC03g06620D/BnaC03g63470D/BnaC04g11450D/BnaC04g12260D/BnaC04g18790D/BnaC04g18800D/BnaC06g16280D/BnaC06g16290D/BnaC08g05470D/BnaC09g42740D	12
GO:1901430	positive regulation of syringal lignin biosynthetic process	12/12729	12/76374	4.57e-10	4.01e-09	2.42e-09	BnaA02g28360D/BnaA02g35490D/BnaA06g25640D/BnaA09g11280D/BnaA09g11780D/BnaA10g10220D/BnaA10g10250D/BnaA10g10260D/BnaC02g12480D/BnaC09g11720D/BnaC09g12530D/BnaCnng32030D	12
GO:0010008	endosome membrane	18/12729	24/76374	4.69e-10	4.09e-09	2.47e-09	BnaA02g19290D/BnaA06g10340D/BnaA06g10830D/BnaA06g38620D/BnaA07g35020D/BnaA07g35600D/BnaA08g23780D/BnaA09g56390D/BnaA09g56670D/BnaAnng27700D/BnaC05g11930D/BnaC05g12340D/BnaC06g39260D/BnaC06g39950D/BnaC06g40530D/BnaC08g16730D/BnaC08g38470D/BnaC08g38730D	18
GO:0009631	cold acclimation	46/12729	111/76374	5.9e-10	5.11e-09	3.09e-09	BnaA01g01560D/BnaA01g14120D/BnaA02g06780D/BnaA02g06790D/BnaA02g28060D/BnaA03g09250D/BnaA03g24010D/BnaA03g46910D/BnaA03g56740D/BnaA04g11900D/BnaA04g21850D/BnaA05g06490D/BnaA05g13070D/BnaA06g32910D/BnaA07g02430D/BnaA07g33560D/BnaA08g14640D/BnaA09g26860D/BnaA09g43450D/BnaA10g12780D/BnaAnng26260D/BnaAnng08360D/BnaAnng08850D/BnaAnng08880D/BnaC02g13690D/BnaC02g48060D/BnaC03g11570D/BnaC03g28550D/BnaC04g…	46
GO:0006424	glutamyl-tRNA aminoacylation	16/12729	20/76374	8.62e-10	7.44e-09	4.49e-09	BnaA01g15800D/BnaA02g31710D/BnaA06g23200D/BnaA06g39470D/BnaA08g19390D/BnaA08g19400D/BnaA09g04160D/BnaA09g28460D/BnaC01g18870D/BnaC02g40340D/BnaC03g40690D/BnaC03g50160D/BnaC03g64100D/BnaC05g20730D/BnaC09g03560D/BnaCnng04720D	16
GO:0005680	anaphase-promoting complex	21/12729	32/76374	8.69e-10	7.46e-09	4.5e-09	BnaA01g11370D/BnaA02g31520D/BnaA03g29200D/BnaA03g57210D/BnaA05g23390D/BnaA06g28240D/BnaA07g00690D/BnaA07g00700D/BnaA07g22810D/BnaA08g02260D/BnaC01g12830D/BnaC03g30140D/BnaC05g37040D/BnaC06g15530D/BnaC06g23770D/BnaC06g26660D/BnaC07g00040D/BnaC07g08590D/BnaC07g28650D/BnaC09g21750D/BnaCnng59940D	21
GO:0009880	embryonic pattern specification	65/12729	185/76374	9.15e-10	7.8e-09	4.71e-09	BnaA01g12740D/BnaA01g27690D/BnaA02g01670D/BnaA03g04360D/BnaA03g08110D/BnaA03g26120D/BnaA03g42250D/BnaA03g45660D/BnaA04g04410D/BnaA04g25980D/BnaA05g04460D/BnaA06g00360D/BnaA06g15750D/BnaA06g21130D/BnaA07g08390D/BnaA07g14790D/BnaA07g16240D/BnaA08g11670D/BnaA08g18290D/BnaA09g00890D/BnaA09g27240D/BnaA09g36280D/BnaA09g51080D/BnaA10g00800D/BnaA10g01560D/BnaA10g14710D/BnaC01g14470D/BnaC01g22210D/BnaC01g…	65
GO:0032544	plastid translation	25/12729	43/76374	9.17e-10	7.8e-09	4.71e-09	BnaA02g09540D/BnaA02g35680D/BnaA03g11790D/BnaA04g02820D/BnaA05g06520D/BnaA07g17010D/BnaA07g24530D/BnaA07g27280D/BnaA09g18590D/BnaA09g18600D/BnaA09g36210D/BnaA10g08390D/BnaC02g13600D/BnaC03g14490D/BnaC03g14780D/BnaC04g07190D/BnaC04g24780D/BnaC06g25750D/BnaC06g30280D/BnaC08g27750D/BnaC09g20520D/BnaC09g20530D/BnaC09g30910D/BnaCnng20420D/BnaCnng27150D	25
GO:0005763	mitochondrial small ribosomal subunit	26/12729	46/76374	9.89e-10	8.37e-09	5.06e-09	BnaA01g34120D/BnaA01g34150D/BnaA01g34210D/BnaA02g02090D/BnaA02g23810D/BnaA02g36040D/BnaA03g28320D/BnaA04g20220D/BnaA05g09320D/BnaA05g32840D/BnaA06g19350D/BnaA07g33670D/BnaA09g32090D/BnaC02g24670D/BnaC03g31130D/BnaC03g33480D/BnaC03g58110D/BnaC04g10720D/BnaC04g37140D/BnaC05g48140D/BnaC06g38290D/BnaC07g35960D/BnaC08g22900D/BnaC09g18950D/BnaC09g40060D/BnaCnng12510D	26
GO:0000794	condensed nuclear chromosome	15/12729	18/76374	1.04e-09	8.73e-09	5.27e-09	BnaA03g26120D/BnaA07g14790D/BnaA08g11670D/BnaA09g00890D/BnaA09g20790D/BnaA09g51080D/BnaA10g01560D/BnaC02g27020D/BnaC03g30850D/BnaC03g77150D/BnaC05g01600D/BnaC06g12710D/BnaC09g00020D/BnaCnng78460D/BnaCnng56400D	15
GO:0000289	nuclear-transcribed mRNA poly(A) tail shortening	14/12729	16/76374	1.09e-09	9.02e-09	5.45e-09	BnaA02g05510D/BnaA02g15520D/BnaA03g08430D/BnaA06g38950D/BnaA07g23430D/BnaA07g29550D/BnaA10g14100D/BnaC02g09390D/BnaC02g20760D/BnaC03g10750D/BnaC03g54940D/BnaC05g37890D/BnaC06g32740D/BnaCnng07860D	14
GO:0006611	protein export from nucleus	14/12729	16/76374	1.09e-09	9.02e-09	5.45e-09	BnaA02g03360D/BnaA03g06340D/BnaA05g32360D/BnaA07g25560D/BnaA10g17560D/BnaC01g39630D/BnaC02g06980D/BnaC03g08140D/BnaC03g08180D/BnaC04g49920D/BnaC06g27360D/BnaC09g40920D/BnaCnng06240D/BnaCnng62660D	14
GO:0050792	regulation of viral process	14/12729	16/76374	1.09e-09	9.02e-09	5.45e-09	BnaA01g23620D/BnaA02g23750D/BnaA02g34480D/BnaA06g23890D/BnaA08g09280D/BnaAnng40930D/BnaAnng05470D/BnaC01g11930D/BnaC02g43430D/BnaC02g47480D/BnaC03g49330D/BnaC03g63590D/BnaC07g02830D/BnaCnng29900D	14
GO:0006007	glucose catabolic process	131/12729	474/76374	1.33e-09	1.1e-08	6.63e-09	BnaA01g03380D/BnaA01g06210D/BnaA01g33280D/BnaA01g34630D/BnaA02g00190D/BnaA02g00780D/BnaA02g17330D/BnaA02g29720D/BnaA03g03180D/BnaA03g21770D/BnaA03g27640D/BnaA03g35530D/BnaA03g51130D/BnaA03g52040D/BnaA03g54310D/BnaA03g54880D/BnaA03g55890D/BnaA04g01850D/BnaA04g26990D/BnaA04g28670D/BnaA05g00550D/BnaA05g01630D/BnaA05g11710D/BnaA05g19180D/BnaA05g29640D/BnaA05g34100D/BnaA05g36070D/BnaA06g01340D/BnaA06g…	131
GO:0006561	proline biosynthetic process	20/12729	30/76374	1.45e-09	1.18e-08	7.14e-09	BnaA03g18760D/BnaA03g19960D/BnaA04g03460D/BnaA04g22810D/BnaA04g24740D/BnaA05g05760D/BnaA05g34370D/BnaA06g36140D/BnaA09g17880D/BnaA09g35230D/BnaC03g23960D/BnaC03g72600D/BnaC04g05620D/BnaC04g46630D/BnaC04g48620D/BnaC04g52880D/BnaC04g55570D/BnaC07g18960D/BnaC08g26550D/BnaC09g19200D	20
GO:0044070	regulation of anion transport	20/12729	30/76374	1.45e-09	1.18e-08	7.14e-09	BnaA01g25720D/BnaA02g02470D/BnaA03g10240D/BnaA03g27530D/BnaA03g35540D/BnaA05g19160D/BnaA05g37480D/BnaA10g29750D/BnaC01g32850D/BnaC03g12920D/BnaC03g32540D/BnaC03g41320D/BnaC05g32550D/BnaC09g32780D/BnaCnng69120D/BnaCnng35390D/BnaCnng35410D/BnaCnng42590D/BnaCnng05760D/BnaCnng52100D	20
GO:0070574	cadmium ion transmembrane transport	20/12729	30/76374	1.45e-09	1.18e-08	7.14e-09	BnaA01g28090D/BnaA01g35020D/BnaA03g44160D/BnaA03g44180D/BnaA05g23360D/BnaA06g09880D/BnaA07g19610D/BnaA08g31540D/BnaAnng39890D/BnaC05g11500D/BnaC05g37000D/BnaC07g36020D/BnaC07g36030D/BnaC08g16540D/BnaCnng46010D/BnaCnng46020D/BnaCnng60340D/BnaCnng64010D/BnaCnng65140D/BnaCnng67060D	20
GO:0031323	regulation of cellular metabolic process	24/12729	41/76374	1.64e-09	1.33e-08	8.05e-09	BnaA01g10070D/BnaA01g30640D/BnaA01g31270D/BnaA02g30080D/BnaA03g15010D/BnaA03g23420D/BnaA05g09460D/BnaA05g10630D/BnaA07g03950D/BnaA08g09300D/BnaA09g50470D/BnaAnng12430D/BnaC01g11890D/BnaC01g38310D/BnaC02g09350D/BnaC02g38510D/BnaC03g41540D/BnaC03g73300D/BnaC04g12150D/BnaC04g33800D/BnaC04g39680D/BnaC04g43490D/BnaC07g00280D/BnaCnng65590D	24
GO:0032440	2-alkenal reductase [NAD(P)+] activity	46/12729	114/76374	1.67e-09	1.35e-08	8.14e-09	BnaA01g02100D/BnaA01g08270D/BnaA01g26430D/BnaA02g12070D/BnaA03g44500D/BnaA06g10730D/BnaA06g16650D/BnaA07g01410D/BnaA07g06100D/BnaA07g11770D/BnaA07g26310D/BnaA07g33390D/BnaA08g23680D/BnaA09g04260D/BnaA09g05320D/BnaA09g35820D/BnaA09g37590D/BnaA09g40540D/BnaAnng17980D/BnaC01g03250D/BnaC02g32660D/BnaC02g45200D/BnaC03g63790D/BnaC04g43440D/BnaC04g43580D/BnaC04g47840D/BnaC05g12240D/BnaC06g28380D/BnaC06g…	46
GO:0016602	CCAAT-binding factor complex	26/12729	47/76374	1.86e-09	1.5e-08	9.03e-09	BnaA01g25500D/BnaA02g01270D/BnaA03g04040D/BnaA03g29140D/BnaA03g35980D/BnaA05g09110D/BnaA05g19990D/BnaA06g01280D/BnaA06g05230D/BnaA09g26040D/BnaA09g48620D/BnaA10g29990D/BnaAnng02740D/BnaC02g04360D/BnaC03g05640D/BnaC03g41820D/BnaC04g10470D/BnaC05g06520D/BnaC05g19190D/BnaC05g23480D/BnaC05g31370D/BnaC05g46110D/BnaC06g06950D/BnaC08g42880D/BnaC09g44190D/BnaCnng06510D	26
GO:0008308	voltage-gated anion channel activity	21/12729	33/76374	2.01e-09	1.61e-08	9.72e-09	BnaA01g25720D/BnaA02g02470D/BnaA03g10240D/BnaA03g27530D/BnaA03g35540D/BnaA05g19160D/BnaA05g37480D/BnaA10g11490D/BnaA10g29750D/BnaC01g32850D/BnaC03g12920D/BnaC03g32540D/BnaC03g41320D/BnaC05g32550D/BnaC09g32780D/BnaCnng69120D/BnaCnng35390D/BnaCnng35410D/BnaCnng42590D/BnaCnng05760D/BnaCnng52100D	21
GO:0004617	phosphoglycerate dehydrogenase activity	11/12729	11/76374	2.75e-09	2.09e-08	1.26e-08	BnaA01g02930D/BnaA03g35260D/BnaA03g50990D/BnaA08g11320D/BnaA08g22970D/BnaA09g24750D/BnaC01g04190D/BnaC03g40970D/BnaC03g77030D/BnaC03g77040D/BnaC08g17520D	11
GO:0005847	mRNA cleavage and polyadenylation specificity factor complex	11/12729	11/76374	2.75e-09	2.09e-08	1.26e-08	BnaA06g26440D/BnaA07g07290D/BnaA08g17330D/BnaAnng11340D/BnaAnng27360D/BnaAnng00220D/BnaC01g28980D/BnaC03g59730D/BnaC07g08930D/BnaC07g30520D/BnaCnng18960D	11
GO:0006643	membrane lipid metabolic process	11/12729	11/76374	2.75e-09	2.09e-08	1.26e-08	BnaA02g09480D/BnaA02g27960D/BnaA03g24870D/BnaA03g24880D/BnaA03g36540D/BnaA09g21320D/BnaC03g66150D/BnaC03g72910D/BnaC03g73050D/BnaC09g23720D/BnaC09g23730D	11
GO:0019003	GDP binding	11/12729	11/76374	2.75e-09	2.09e-08	1.26e-08	BnaA01g05530D/BnaA06g11750D/BnaA06g40550D/BnaA07g30360D/BnaA08g23080D/BnaA08g23090D/BnaC01g00410D/BnaC05g13580D/BnaC06g33810D/BnaC07g47110D/BnaC08g48370D	11
GO:0034970	histone H3-R2 methylation	11/12729	11/76374	2.75e-09	2.09e-08	1.26e-08	BnaA02g30530D/BnaA05g30580D/BnaA06g29740D/BnaA07g04710D/BnaC02g38900D/BnaC03g34160D/BnaC03g76770D/BnaC03g76780D/BnaC05g45040D/BnaC05g49560D/BnaC07g27000D	11
GO:0034971	histone H3-R17 methylation	11/12729	11/76374	2.75e-09	2.09e-08	1.26e-08	BnaA02g30530D/BnaA05g30580D/BnaA06g29740D/BnaA07g04710D/BnaC02g38900D/BnaC03g34160D/BnaC03g76770D/BnaC03g76780D/BnaC05g45040D/BnaC05g49560D/BnaC07g27000D	11
GO:0034972	histone H3-R26 methylation	11/12729	11/76374	2.75e-09	2.09e-08	1.26e-08	BnaA02g30530D/BnaA05g30580D/BnaA06g29740D/BnaA07g04710D/BnaC02g38900D/BnaC03g34160D/BnaC03g76770D/BnaC03g76780D/BnaC05g45040D/BnaC05g49560D/BnaC07g27000D	11
GO:0035101	FACT complex	11/12729	11/76374	2.75e-09	2.09e-08	1.26e-08	BnaA02g29370D/BnaA03g24480D/BnaA03g24490D/BnaA06g31340D/BnaA09g22410D/BnaC02g37430D/BnaC03g29110D/BnaC07g25280D/BnaCnng25210D/BnaCnng25220D/BnaCnng25230D	11
GO:0035175	histone kinase activity (H3-S10 specific)	11/12729	11/76374	2.75e-09	2.09e-08	1.26e-08	BnaA01g04120D/BnaA03g02750D/BnaA04g26230D/BnaA05g04900D/BnaA08g12000D/BnaC01g05580D/BnaC03g49250D/BnaC03g66890D/BnaC04g04240D/BnaC04g50240D/BnaC08g19700D	11
GO:0060211	regulation of nuclear-transcribed mRNA poly(A) tail shortening	11/12729	11/76374	2.75e-09	2.09e-08	1.26e-08	BnaA01g03050D/BnaA03g57630D/BnaA07g04230D/BnaA08g11610D/BnaA08g20740D/BnaC01g04280D/BnaC03g45780D/BnaC03g77220D/BnaC04g16540D/BnaC07g05020D/BnaC08g06080D	11
GO:0070628	proteasome binding	11/12729	11/76374	2.75e-09	2.09e-08	1.26e-08	BnaA04g08670D/BnaA06g10810D/BnaA07g14440D/BnaA07g20230D/BnaA09g56400D/BnaC03g33000D/BnaC04g30910D/BnaC05g12320D/BnaC06g19700D/BnaC08g38480D/BnaCnng32650D	11
GO:0006614	SRP-dependent cotranslational protein targeting to membrane	20/12729	31/76374	3.44e-09	2.61e-08	1.58e-08	BnaA01g06530D/BnaA02g33100D/BnaA03g50330D/BnaA04g26420D/BnaA05g05110D/BnaA06g21420D/BnaA07g24920D/BnaA07g24930D/BnaA07g26580D/BnaA08g03500D/BnaAnng40040D/BnaC01g07800D/BnaC03g52150D/BnaC04g04490D/BnaC04g50450D/BnaC06g01660D/BnaC06g26620D/BnaC06g26630D/BnaC06g28700D/BnaC08g03850D	20
GO:0010187	negative regulation of seed germination	39/12729	91/76374	3.69e-09	2.78e-08	1.68e-08	BnaA03g24740D/BnaA03g39320D/BnaA03g39360D/BnaA03g59360D/BnaA05g08020D/BnaA05g32630D/BnaA05g32640D/BnaA06g03820D/BnaA09g05850D/BnaA09g05860D/BnaA09g21880D/BnaA09g29090D/BnaA10g17240D/BnaA10g27060D/BnaA10g27070D/BnaA10g27080D/BnaAnng12060D/BnaAnng12070D/BnaAnng07530D/BnaC01g15090D/BnaC01g27600D/BnaC03g29350D/BnaC03g46680D/BnaC03g46690D/BnaC04g09030D/BnaC04g18270D/BnaC04g18290D/BnaC04g42010D/BnaC04g…	39
GO:0043022	ribosome binding	18/12729	26/76374	3.87e-09	2.91e-08	1.76e-08	BnaA01g03600D/BnaA03g04430D/BnaA04g03450D/BnaA07g27940D/BnaA08g11850D/BnaA08g19830D/BnaA09g29060D/BnaA09g35240D/BnaC01g04940D/BnaC03g05950D/BnaC03g57360D/BnaC03g66710D/BnaC04g25350D/BnaC05g20200D/BnaC06g30570D/BnaC07g12330D/BnaC08g26570D/BnaCnng74170D	18
GO:0048364	root development	111/12729	390/76374	3.94e-09	2.95e-08	1.78e-08	BnaA01g13120D/BnaA01g26980D/BnaA01g27690D/BnaA01g33380D/BnaA02g04910D/BnaA03g04760D/BnaA03g06690D/BnaA03g11310D/BnaA03g18760D/BnaA03g18780D/BnaA03g20470D/BnaA03g42250D/BnaA03g54310D/BnaA04g07110D/BnaA04g22810D/BnaA05g03550D/BnaA05g05750D/BnaA05g05760D/BnaA05g22070D/BnaA05g32120D/BnaA05g36460D/BnaA05g36400D/BnaA06g03420D/BnaA06g03440D/BnaA06g03620D/BnaA06g05440D/BnaA06g28940D/BnaA07g01140D/BnaA07g…	111
GO:0009911	positive regulation of flower development	58/12729	163/76374	4.15e-09	3.09e-08	1.86e-08	BnaA01g05490D/BnaA01g14770D/BnaA01g14780D/BnaA02g00930D/BnaA02g03350D/BnaA02g05430D/BnaA02g20680D/BnaA02g21010D/BnaA03g08370D/BnaA03g28200D/BnaA03g28670D/BnaA03g31180D/BnaA04g06440D/BnaA05g03310D/BnaA05g17020D/BnaA05g32340D/BnaA06g40640D/BnaA07g33120D/BnaA08g16520D/BnaA08g27870D/BnaA09g20180D/BnaA09g37880D/BnaA10g02550D/BnaA10g14240D/BnaA10g14250D/BnaAnng37780D/BnaC01g17410D/BnaC01g40650D/BnaC01g…	58
GO:0035061	interchromatin granule	15/12729	19/76374	4.16e-09	3.09e-08	1.86e-08	BnaA02g20550D/BnaA05g13830D/BnaA06g00410D/BnaA06g22020D/BnaA06g37780D/BnaA08g00560D/BnaAnng00100D/BnaC01g37560D/BnaC02g27300D/BnaC03g70430D/BnaC05g06630D/BnaC06g07190D/BnaC06g10860D/BnaCnng19170D/BnaCnng00990D	15
GO:0080130	L-phenylalanine:2-oxoglutarate aminotransferase activity	21/12729	34/76374	4.43e-09	3.27e-08	1.98e-08	BnaA01g04910D/BnaA02g04300D/BnaA03g03400D/BnaA03g51850D/BnaA03g54610D/BnaA04g28670D/BnaA05g11710D/BnaA09g10660D/BnaA09g12700D/BnaA10g15590D/BnaC01g06460D/BnaC02g03850D/BnaC02g08820D/BnaC03g04830D/BnaC04g19940D/BnaC04g36800D/BnaC04g41630D/BnaC04g54310D/BnaC09g13020D/BnaC09g54080D/BnaCnng72730D	21
GO:0051014	actin filament severing	13/12729	15/76374	5.72e-09	4.21e-08	2.54e-08	BnaA01g06850D/BnaA03g38430D/BnaA08g13190D/BnaA09g36730D/BnaAnng10840D/BnaAnng15630D/BnaC01g08210D/BnaC03g68060D/BnaC04g14870D/BnaC06g12200D/BnaC07g50870D/BnaC08g28360D/BnaCnng29560D	13
GO:0009955	adaxial/abaxial pattern specification	23/12729	40/76374	5.81e-09	4.26e-08	2.58e-08	BnaA02g21980D/BnaA02g22240D/BnaA03g57860D/BnaA03g57870D/BnaA04g15900D/BnaA06g04800D/BnaA07g04790D/BnaA07g13270D/BnaA09g16470D/BnaA09g22530D/BnaA09g23960D/BnaC02g29130D/BnaC02g30260D/BnaC03g44490D/BnaC03g44500D/BnaC04g16800D/BnaC04g39150D/BnaC06g08730D/BnaC06g28070D/BnaC07g47930D/BnaC09g17540D/BnaC09g24510D/BnaCnng60060D	23
GO:0004843	thiol-dependent ubiquitin-specific protease activity	36/12729	82/76374	6.64e-09	4.85e-08	2.93e-08	BnaA01g06250D/BnaA01g34630D/BnaA03g08340D/BnaA05g25080D/BnaA06g02150D/BnaA06g15750D/BnaA06g21130D/BnaA07g25370D/BnaA08g01820D/BnaA08g12840D/BnaA08g28090D/BnaA09g50520D/BnaA10g14260D/BnaAnng36850D/BnaAnng26520D/BnaAnng28020D/BnaC01g00780D/BnaC01g07520D/BnaC01g36880D/BnaC03g10610D/BnaC03g38530D/BnaC03g52350D/BnaC03g52360D/BnaC03g67850D/BnaC03g77920D/BnaC04g47510D/BnaC04g52210D/BnaC05g39260D/BnaC06g…	36
GO:0052541	plant-type cell wall cellulose metabolic process	55/12729	153/76374	6.8e-09	4.94e-08	2.99e-08	BnaA01g28090D/BnaA02g04500D/BnaA03g07760D/BnaA03g16370D/BnaA03g39420D/BnaA03g60260D/BnaA03g60270D/BnaA04g11280D/BnaA05g08250D/BnaA05g23360D/BnaA05g29640D/BnaA06g09870D/BnaA06g09880D/BnaA07g03260D/BnaA07g19610D/BnaA08g26140D/BnaA08g31540D/BnaA09g08910D/BnaA09g09830D/BnaA09g11470D/BnaA09g11480D/BnaA09g14380D/BnaA10g06760D/BnaA10g15380D/BnaAnng25900D/BnaAnng07780D/BnaC01g29550D/BnaC01g29560D/BnaC02g…	55
GO:0006520	cellular amino acid metabolic process	33/12729	72/76374	7.48e-09	5.42e-08	3.27e-08	BnaA01g04910D/BnaA01g26440D/BnaA01g33880D/BnaA02g04300D/BnaA03g03400D/BnaA03g51850D/BnaA03g54610D/BnaA04g28670D/BnaA05g11710D/BnaA05g37230D/BnaA06g02140D/BnaA08g01810D/BnaA09g10660D/BnaA09g12700D/BnaA10g15590D/BnaA10g16660D/BnaC01g06460D/BnaC01g40390D/BnaC02g03850D/BnaC02g08820D/BnaC03g04830D/BnaC03g77940D/BnaC04g19940D/BnaC04g36800D/BnaC04g41630D/BnaC04g54310D/BnaC05g47630D/BnaC05g47670D/BnaC06g…	33
GO:0030570	pectate lyase activity	40/12729	97/76374	8.95e-09	6.46e-08	3.9e-08	BnaA01g14130D/BnaA02g13340D/BnaA02g30490D/BnaA03g08040D/BnaA03g46920D/BnaA04g06680D/BnaA04g07000D/BnaA05g30530D/BnaA06g22590D/BnaA07g05380D/BnaA07g06080D/BnaA07g38610D/BnaA08g05020D/BnaA08g14630D/BnaA08g28010D/BnaA09g03190D/BnaA09g06500D/BnaA10g02830D/BnaAnng14170D/BnaAnng22760D/BnaC01g16630D/BnaC02g17500D/BnaC02g38820D/BnaC02g38830D/BnaC03g74840D/BnaC04g55760D/BnaC05g44980D/BnaC05g48970D/BnaC06g…	40
GO:0016604	nuclear body	28/12729	56/76374	9.18e-09	6.6e-08	3.98e-08	BnaA01g23620D/BnaA01g35180D/BnaA02g34480D/BnaA03g18810D/BnaA03g46750D/BnaA04g19110D/BnaA05g15240D/BnaA05g34990D/BnaA06g02320D/BnaA06g14490D/BnaA06g23890D/BnaA07g32560D/BnaA08g01960D/BnaAnng40930D/BnaC02g43430D/BnaC03g49330D/BnaC03g77820D/BnaC03g72290D/BnaC04g11750D/BnaC04g43440D/BnaC05g15890D/BnaC06g04600D/BnaC06g08860D/BnaC06g37000D/BnaC07g38950D/BnaC07g38960D/BnaC08g19330D/BnaCnng29900D	28
GO:0042761	very long-chain fatty acid biosynthetic process	22/12729	38/76374	1.05e-08	7.49e-08	4.53e-08	BnaA01g15170D/BnaA02g29490D/BnaA03g02950D/BnaA03g47710D/BnaA04g04410D/BnaA06g31220D/BnaA06g31230D/BnaA07g04820D/BnaA07g16240D/BnaA10g21780D/BnaC01g41560D/BnaC02g37590D/BnaC03g04350D/BnaC04g26680D/BnaC06g15010D/BnaC06g24760D/BnaC07g25380D/BnaC07g39990D/BnaC08g12060D/BnaC09g01940D/BnaC09g46070D/BnaCnng00400D	22
GO:0004350	glutamate-5-semialdehyde dehydrogenase activity	10/12729	10/76374	1.65e-08	1.1e-07	6.64e-08	BnaA03g18760D/BnaA04g03460D/BnaA04g22810D/BnaA05g05760D/BnaA09g35230D/BnaC03g72600D/BnaC04g05620D/BnaC04g46630D/BnaC04g55570D/BnaC08g26550D	10
GO:0004801	sedoheptulose-7-phosphate:D-glyceraldehyde-3-phosphate glyceronetransferase activity	10/12729	10/76374	1.65e-08	1.1e-07	6.64e-08	BnaA02g01610D/BnaA03g04310D/BnaA06g08320D/BnaA08g02750D/BnaA10g19920D/BnaC02g04730D/BnaC03g05850D/BnaC03g07200D/BnaC05g09650D/BnaC09g43670D	10
GO:0004828	serine-tRNA ligase activity	10/12729	10/76374	1.65e-08	1.1e-07	6.64e-08	BnaA02g31180D/BnaA06g28710D/BnaA08g25080D/BnaA09g03770D/BnaA09g47500D/BnaC02g39740D/BnaC07g28030D/BnaC08g15130D/BnaC08g41780D/BnaC09g03190D	10
GO:0005353	fructose transmembrane transporter activity	10/12729	10/76374	1.65e-08	1.1e-07	6.64e-08	BnaA02g03350D/BnaA03g28200D/BnaA05g32340D/BnaC02g06970D/BnaC03g33300D/BnaC03g33320D/BnaC04g49940D/BnaCnng06220D/BnaCnng14730D/BnaCnng18320D	10
GO:0006434	seryl-tRNA aminoacylation	10/12729	10/76374	1.65e-08	1.1e-07	6.64e-08	BnaA02g31180D/BnaA06g28710D/BnaA08g25080D/BnaA09g03770D/BnaA09g47500D/BnaC02g39740D/BnaC07g28030D/BnaC08g15130D/BnaC08g41780D/BnaC09g03190D	10
GO:0008398	sterol 14-demethylase activity	10/12729	10/76374	1.65e-08	1.1e-07	6.64e-08	BnaA06g07270D/BnaA08g31650D/BnaAnng33870D/BnaAnng33880D/BnaC01g44720D/BnaC08g07160D/BnaCnng75820D/BnaCnng41000D/BnaCnng41010D/BnaCnng18080D	10
GO:0009973	adenylyl-sulfate reductase activity	10/12729	10/76374	1.65e-08	1.1e-07	6.64e-08	BnaA01g11840D/BnaA02g21080D/BnaA03g45080D/BnaA03g59800D/BnaA09g20370D/BnaC01g13420D/BnaC02g26090D/BnaC04g19270D/BnaC07g37060D/BnaC09g22760D	10
GO:0010248	establishment or maintenance of transmembrane electrochemical gradient	10/12729	10/76374	1.65e-08	1.1e-07	6.64e-08	BnaA06g10340D/BnaA06g38620D/BnaA07g35600D/BnaA08g23780D/BnaA09g56670D/BnaC05g11930D/BnaC06g39260D/BnaC06g40530D/BnaC08g16730D/BnaC08g38730D	10
GO:0010476	gibberellin mediated signaling pathway	10/12729	10/76374	1.65e-08	1.1e-07	6.64e-08	BnaA06g12310D/BnaA08g22790D/BnaA09g44710D/BnaAnng11210D/BnaC01g35030D/BnaC05g34800D/BnaC05g50130D/BnaC08g03440D/BnaC08g17760D/BnaC08g37410D	10
GO:0015755	fructose transmembrane transport	10/12729	10/76374	1.65e-08	1.1e-07	6.64e-08	BnaA02g03350D/BnaA03g28200D/BnaA05g32340D/BnaC02g06970D/BnaC03g33300D/BnaC03g33320D/BnaC04g49940D/BnaCnng06220D/BnaCnng14730D/BnaCnng18320D	10
GO:0043987	histone H3-S10 phosphorylation	10/12729	10/76374	1.65e-08	1.1e-07	6.64e-08	BnaA01g04120D/BnaA03g02750D/BnaA04g26230D/BnaA05g04900D/BnaA08g12000D/BnaC01g05580D/BnaC03g66890D/BnaC04g04240D/BnaC04g50240D/BnaC08g19700D	10
GO:0045254	pyruvate dehydrogenase complex	10/12729	10/76374	1.65e-08	1.1e-07	6.64e-08	BnaA03g33170D/BnaA04g05600D/BnaA04g05610D/BnaA05g25500D/BnaA06g00560D/BnaC03g38230D/BnaC04g28350D/BnaC06g07040D/BnaC08g23510D/BnaCnng28440D	10
GO:0048640	negative regulation of developmental growth	10/12729	10/76374	1.65e-08	1.1e-07	6.64e-08	BnaA01g15170D/BnaA03g02950D/BnaA03g47710D/BnaA10g21780D/BnaC01g41560D/BnaC03g04350D/BnaC06g24760D/BnaC07g39990D/BnaC08g12060D/BnaC09g46070D	10
GO:0050732	negative regulation of peptidyl-tyrosine phosphorylation	10/12729	10/76374	1.65e-08	1.1e-07	6.64e-08	BnaA01g15170D/BnaA03g02950D/BnaA03g47710D/BnaA10g21780D/BnaC01g41560D/BnaC03g04350D/BnaC06g24760D/BnaC07g39990D/BnaC08g12060D/BnaC09g46070D	10
GO:0070182	DNA polymerase binding	10/12729	10/76374	1.65e-08	1.1e-07	6.64e-08	BnaA03g14370D/BnaA04g03980D/BnaA04g04010D/BnaA05g11560D/BnaC03g17430D/BnaC04g13490D/BnaC04g26000D/BnaC04g26090D/BnaC04g42140D/BnaUnng02190D	10
GO:0080056	petal vascular tissue pattern formation	10/12729	10/76374	1.65e-08	1.1e-07	6.64e-08	BnaA04g07110D/BnaA05g36400D/BnaA06g03420D/BnaA06g03440D/BnaA08g02930D/BnaC04g05890D/BnaC05g32400D/BnaC06g40890D/BnaC08g03190D/BnaCnng45920D	10
GO:0080057	sepal vascular tissue pattern formation	10/12729	10/76374	1.65e-08	1.1e-07	6.64e-08	BnaA04g07110D/BnaA05g36400D/BnaA06g03420D/BnaA06g03440D/BnaA08g02930D/BnaC04g05890D/BnaC05g32400D/BnaC06g40890D/BnaC08g03190D/BnaCnng45920D	10
GO:2001020	regulation of response to DNA damage stimulus	10/12729	10/76374	1.65e-08	1.1e-07	6.64e-08	BnaA01g19000D/BnaA01g21040D/BnaAnng38300D/BnaAnng03880D/BnaC01g42660D/BnaC06g07750D/BnaC08g48660D/BnaC09g11140D/BnaCnng69240D/BnaCnng55140D	10
GO:0042325	regulation of phosphorylation	14/12729	18/76374	1.98e-08	1.31e-07	7.93e-08	BnaA01g24050D/BnaA03g30500D/BnaA05g13880D/BnaA05g28660D/BnaA06g33370D/BnaA09g19590D/BnaA09g19600D/BnaAnng30450D/BnaAnng00670D/BnaC02g03070D/BnaC03g35810D/BnaC05g43110D/BnaC09g21590D/BnaCnng54820D	14
GO:0005355	glucose transmembrane transporter activity	13/12729	16/76374	2.58e-08	1.7e-07	1.03e-07	BnaA01g26430D/BnaA02g03350D/BnaA03g28200D/BnaA05g32340D/BnaC01g33830D/BnaC02g06970D/BnaC03g33300D/BnaC03g33320D/BnaC03g73840D/BnaC04g49940D/BnaCnng06220D/BnaCnng14730D/BnaCnng18320D	13
GO:0015675	nickel cation transport	13/12729	16/76374	2.58e-08	1.7e-07	1.03e-07	BnaA01g35000D/BnaA01g35010D/BnaA01g35020D/BnaA03g44160D/BnaA03g44180D/BnaAnng39890D/BnaC07g36020D/BnaC07g36030D/BnaCnng46010D/BnaCnng46020D/BnaCnng65140D/BnaCnng65150D/BnaCnng67060D	13
GO:0000015	phosphopyruvate hydratase complex	11/12729	12/76374	2.79e-08	1.82e-07	1.1e-07	BnaA03g16750D/BnaA05g07770D/BnaA05g12480D/BnaA07g31190D/BnaA09g33310D/BnaAnng21140D/BnaC03g20200D/BnaC04g08780D/BnaC04g54450D/BnaC06g34880D/BnaC08g24110D	11
GO:0004634	phosphopyruvate hydratase activity	11/12729	12/76374	2.79e-08	1.82e-07	1.1e-07	BnaA03g16750D/BnaA05g07770D/BnaA05g12480D/BnaA07g31190D/BnaA09g33310D/BnaAnng21140D/BnaC03g20200D/BnaC04g08780D/BnaC04g54450D/BnaC06g34880D/BnaC08g24110D	11
GO:0008641	ubiquitin-like modifier activating enzyme activity	11/12729	12/76374	2.79e-08	1.82e-07	1.1e-07	BnaA08g27000D/BnaA08g28200D/BnaA09g50410D/BnaA10g03210D/BnaC05g03200D/BnaC05g03220D/BnaC08g12460D/BnaC08g36440D/BnaC08g44060D/BnaC08g46380D/BnaC09g49220D	11
GO:0004488	methylenetetrahydrofolate dehydrogenase (NADP+) activity	12/12729	14/76374	2.98e-08	1.94e-07	1.17e-07	BnaA03g25950D/BnaA03g32210D/BnaA05g26750D/BnaA09g51830D/BnaC03g37500D/BnaC05g40770D/BnaC07g02660D/BnaC07g02720D/BnaC07g02730D/BnaCnng22920D/BnaCnng31000D/BnaCnng02210D	12
GO:0010119	regulation of stomatal movement	79/12729	260/76374	3.13e-08	2.03e-07	1.22e-07	BnaA01g15250D/BnaA01g20940D/BnaA01g21820D/BnaA01g37370D/BnaA02g31220D/BnaA03g11290D/BnaA03g18380D/BnaA03g18390D/BnaA03g47830D/BnaA03g50340D/BnaA03g54310D/BnaA04g12350D/BnaA04g15260D/BnaA04g15350D/BnaA04g19110D/BnaA05g27660D/BnaA05g34990D/BnaA06g05440D/BnaA06g28650D/BnaA07g33120D/BnaA07g34200D/BnaA07g37150D/BnaA08g14490D/BnaA08g19440D/BnaA08g26320D/BnaA09g03810D/BnaA09g09830D/BnaA09g18100D/BnaA09g…	79
GO:0005986	sucrose biosynthetic process	32/12729	72/76374	3.14e-08	2.03e-07	1.22e-07	BnaA01g10280D/BnaA03g08110D/BnaA04g18070D/BnaA05g06270D/BnaA05g06280D/BnaA05g12940D/BnaA05g16620D/BnaA07g22680D/BnaA07g30830D/BnaA07g35820D/BnaA07g38260D/BnaA08g00340D/BnaA09g00710D/BnaA10g14710D/BnaC01g41280D/BnaC03g10290D/BnaC03g70760D/BnaC03g70770D/BnaC04g06500D/BnaC04g06510D/BnaC04g06520D/BnaC06g12120D/BnaC06g23590D/BnaC06g34330D/BnaC09g37040D/BnaCnng23260D/BnaCnng74430D/BnaCnng33740D/BnaCnng…	32
GO:0001666	response to hypoxia	96/12729	337/76374	4.02e-08	2.58e-07	1.56e-07	BnaA01g01450D/BnaA01g04300D/BnaA01g10280D/BnaA01g16450D/BnaA01g25900D/BnaA01g37380D/BnaA02g08140D/BnaA02g23800D/BnaA02g34000D/BnaA03g08110D/BnaA03g26470D/BnaA03g35410D/BnaA04g09690D/BnaA04g18070D/BnaA05g06270D/BnaA05g06280D/BnaA05g12940D/BnaA05g16620D/BnaA05g36790D/BnaA06g18440D/BnaA06g23140D/BnaA07g03790D/BnaA07g22440D/BnaA07g22510D/BnaA07g22680D/BnaA07g30830D/BnaA07g31160D/BnaA07g31180D/BnaA07g…	96
GO:0002238	response to molecule of fungal origin	51/12729	144/76374	4.12e-08	2.64e-07	1.59e-07	BnaA02g18470D/BnaA02g18480D/BnaA02g33970D/BnaA03g38160D/BnaA03g51380D/BnaA04g14330D/BnaA05g18880D/BnaA06g07040D/BnaA06g11260D/BnaA06g11820D/BnaA06g15320D/BnaA06g23070D/BnaA06g39800D/BnaA07g33440D/BnaA07g34520D/BnaA08g21270D/BnaA08g21280D/BnaA08g23050D/BnaA08g23490D/BnaA09g19430D/BnaA09g41420D/BnaA09g56190D/BnaA10g20620D/BnaAnng16890D/BnaAnng25230D/BnaAnng33110D/BnaC02g04170D/BnaC02g42820D/BnaC02g…	51
GO:0033180	proton-transporting V-type ATPase, V1 domain	15/12729	21/76374	4.15e-08	2.64e-07	1.59e-07	BnaA03g26090D/BnaA06g14330D/BnaA07g11570D/BnaA07g11590D/BnaA07g32270D/BnaA08g21880D/BnaA09g00960D/BnaC02g27060D/BnaC03g30820D/BnaC05g34480D/BnaC06g36660D/BnaC07g15490D/BnaC09g00070D/BnaCnng20640D/BnaCnng26740D	15
GO:0050072	m7G(5')pppN diphosphatase activity	15/12729	21/76374	4.15e-08	2.64e-07	1.59e-07	BnaA02g01720D/BnaA06g04810D/BnaA08g27050D/BnaA09g48930D/BnaA10g19790D/BnaAnng28130D/BnaC02g04850D/BnaC03g05960D/BnaC04g32430D/BnaC05g06060D/BnaC08g43210D/BnaC09g43520D/BnaCnng27110D/BnaCnng14330D/BnaCnng14350D	15
GO:0051510	regulation of unidimensional cell growth	93/12729	324/76374	4.37e-08	2.77e-07	1.67e-07	BnaA01g07860D/BnaA01g12560D/BnaA01g19810D/BnaA01g26020D/BnaA01g33430D/BnaA02g04940D/BnaA02g31020D/BnaA03g01760D/BnaA03g04530D/BnaA03g04990D/BnaA03g05700D/BnaA03g24910D/BnaA03g28750D/BnaA03g56030D/BnaA03g58880D/BnaA05g06130D/BnaA05g23390D/BnaA06g18060D/BnaA06g29230D/BnaA06g37360D/BnaA07g00690D/BnaA07g00700D/BnaA07g08190D/BnaA08g13550D/BnaA08g16920D/BnaA08g18140D/BnaA08g29630D/BnaA09g19170D/BnaA09g…	93
GO:0071310	cellular response to organic substance	24/12729	47/76374	6.2e-08	3.91e-07	2.36e-07	BnaA03g23420D/BnaA05g09460D/BnaA05g10630D/BnaA06g20790D/BnaA08g08920D/BnaA09g50470D/BnaAnng12430D/BnaAnng08860D/BnaC01g13960D/BnaC01g25090D/BnaC02g09350D/BnaC02g12250D/BnaC02g22770D/BnaC02g45840D/BnaC03g53280D/BnaC03g62780D/BnaC04g29230D/BnaC04g39680D/BnaC08g36910D/BnaC09g19700D/BnaCnng20810D/BnaCnng68410D/BnaCnng23220D/BnaCnng65480D	24
GO:0001558	regulation of cell growth	14/12729	19/76374	6.35e-08	3.99e-07	2.41e-07	BnaA01g00430D/BnaA01g27710D/BnaA03g34250D/BnaA05g23180D/BnaA09g40540D/BnaAnng04270D/BnaC01g01420D/BnaC01g35230D/BnaC02g00100D/BnaC03g39720D/BnaC05g36580D/BnaC08g32980D/BnaC08g33020D/BnaC09g45630D	14
GO:0010467	gene expression	16/12729	24/76374	6.64e-08	4.15e-07	2.51e-07	BnaA01g32880D/BnaA06g22020D/BnaAnng20280D/BnaC03g50890D/BnaC03g62560D/BnaC03g67780D/BnaC04g12600D/BnaC07g00280D/BnaC08g03800D/BnaC08g20200D/BnaC08g24290D/BnaC09g19010D/BnaCnng44130D/BnaCnng46380D/BnaCnng57200D/BnaCnng14970D	16
GO:0001653	peptide receptor activity	20/12729	35/76374	6.65e-08	4.15e-07	2.51e-07	BnaA02g10040D/BnaA02g15930D/BnaA07g22860D/BnaA07g30050D/BnaA07g30590D/BnaA10g07130D/BnaAnng38040D/BnaC02g13990D/BnaC02g21330D/BnaC05g13420D/BnaC05g49970D/BnaC06g23820D/BnaC06g33480D/BnaC06g33500D/BnaC06g36170D/BnaC06g43870D/BnaC06g43210D/BnaC08g37890D/BnaC09g30250D/BnaCnng76560D	20
GO:0015086	cadmium ion transmembrane transporter activity	22/12729	41/76374	6.87e-08	4.28e-07	2.58e-07	BnaA01g28090D/BnaA01g35000D/BnaA01g35010D/BnaA01g35020D/BnaA03g44160D/BnaA03g44180D/BnaA05g23360D/BnaA06g09880D/BnaA07g19610D/BnaA08g31540D/BnaAnng39890D/BnaC05g11500D/BnaC05g37000D/BnaC07g36020D/BnaC07g36030D/BnaC08g16540D/BnaCnng46010D/BnaCnng46020D/BnaCnng60340D/BnaCnng64010D/BnaCnng65140D/BnaCnng67060D	22
GO:0009749	response to glucose	105/12729	383/76374	8.29e-08	5.14e-07	3.1e-07	BnaA01g27690D/BnaA01g28090D/BnaA01g33010D/BnaA02g11520D/BnaA02g16100D/BnaA03g00830D/BnaA03g03390D/BnaA03g08110D/BnaA03g13490D/BnaA03g15610D/BnaA03g18970D/BnaA03g26470D/BnaA03g39510D/BnaA03g42250D/BnaA04g05600D/BnaA04g05610D/BnaA04g11280D/BnaA05g09830D/BnaA05g23360D/BnaA05g29640D/BnaA05g33580D/BnaA06g09870D/BnaA06g09880D/BnaA06g14680D/BnaA06g17510D/BnaA06g20540D/BnaA07g09080D/BnaA07g19610D/BnaA07g…	105
GO:0006564	L-serine biosynthetic process	17/12729	27/76374	8.97e-08	5.54e-07	3.35e-07	BnaA01g02930D/BnaA03g35260D/BnaA03g50990D/BnaA06g25700D/BnaA06g25710D/BnaA08g11320D/BnaA08g14930D/BnaA08g22970D/BnaA09g09210D/BnaA09g24750D/BnaC01g04190D/BnaC03g40970D/BnaC03g62400D/BnaC03g77030D/BnaC03g77040D/BnaC08g17520D/BnaC09g09440D	17
GO:0010225	response to UV-C	13/12729	17/76374	9.27e-08	5.7e-07	3.45e-07	BnaA01g19000D/BnaA01g21040D/BnaA04g03750D/BnaA06g07950D/BnaAnng38300D/BnaAnng03880D/BnaC01g42660D/BnaC04g25620D/BnaC06g07750D/BnaC08g48660D/BnaC09g11140D/BnaCnng69240D/BnaCnng55140D	13
GO:0048574	long-day photoperiodism, flowering	33/12729	79/76374	1.2e-07	7.33e-07	4.43e-07	BnaA02g32550D/BnaA03g38370D/BnaA05g01050D/BnaA05g12950D/BnaA06g12580D/BnaA06g26980D/BnaA08g22640D/BnaA09g04840D/BnaA09g08310D/BnaA10g00780D/BnaA10g26930D/BnaAnng17890D/BnaAnng00500D/BnaC02g03470D/BnaC02g48700D/BnaC03g00040D/BnaC04g00590D/BnaC05g00840D/BnaC05g14140D/BnaC06g12130D/BnaC07g02670D/BnaC07g02690D/BnaC07g29960D/BnaC08g17980D/BnaC09g04380D/BnaC09g08560D/BnaC09g08570D/BnaC09g08580D/BnaCnng…	33
GO:0009650	UV protection	19/12729	33/76374	1.2e-07	7.36e-07	4.44e-07	BnaA01g30460D/BnaA02g26550D/BnaA02g33480D/BnaA03g32350D/BnaA06g09230D/BnaA06g34030D/BnaA08g24010D/BnaA08g24020D/BnaA09g19140D/BnaA09g57120D/BnaAnng21880D/BnaC01g38540D/BnaC02g34760D/BnaC03g37710D/BnaC05g10640D/BnaC07g21870D/BnaC08g39660D/BnaC09g21080D/BnaCnng51240D	19
GO:0044260	cellular macromolecule metabolic process	36/12729	90/76374	1.22e-07	7.44e-07	4.49e-07	BnaA02g30080D/BnaA03g23420D/BnaA03g27960D/BnaA05g09460D/BnaA05g10630D/BnaA06g39480D/BnaA07g27790D/BnaA09g50470D/BnaA09g52320D/BnaAnng12430D/BnaAnng13180D/BnaAnng38870D/BnaAnng39160D/BnaAnng20140D/BnaC01g11890D/BnaC01g13450D/BnaC01g23510D/BnaC02g09350D/BnaC02g38510D/BnaC03g07910D/BnaC03g41540D/BnaC03g67780D/BnaC04g12600D/BnaC04g22320D/BnaC04g33800D/BnaC04g39680D/BnaC05g08830D/BnaC06g32370D/BnaC08g…	36
GO:0031461	cullin-RING ubiquitin ligase complex	12/12729	15/76374	1.26e-07	7.66e-07	4.63e-07	BnaA03g26120D/BnaA07g14790D/BnaA08g11670D/BnaA09g00890D/BnaA09g51080D/BnaA10g01560D/BnaC03g30850D/BnaC03g77150D/BnaC05g01600D/BnaC06g12710D/BnaC09g00020D/BnaCnng78460D	12
GO:0000060	obsolete protein import into nucleus, translocation	11/12729	13/76374	1.54e-07	9.15e-07	5.53e-07	BnaA03g13680D/BnaA08g28880D/BnaA10g04580D/BnaAnng15790D/BnaAnng17390D/BnaC03g16570D/BnaC05g04930D/BnaC08g02020D/BnaC08g02070D/BnaC08g45160D/BnaC09g33880D	11
GO:0010254	nectary development	11/12729	13/76374	1.54e-07	9.15e-07	5.53e-07	BnaA04g03040D/BnaA04g23860D/BnaA05g02160D/BnaA07g17180D/BnaA09g36500D/BnaC02g38200D/BnaC04g01830D/BnaC04g24530D/BnaC04g47620D/BnaC08g28070D/BnaCnng07590D	11
GO:0070981	L-asparagine biosynthetic process	11/12729	13/76374	1.54e-07	9.15e-07	5.53e-07	BnaA03g02840D/BnaA04g05900D/BnaA06g17510D/BnaA06g20540D/BnaA06g23950D/BnaC03g04190D/BnaC03g49300D/BnaC03g53730D/BnaC03g75390D/BnaC09g04980D/BnaCnng72260D	11
GO:2000070	regulation of response to water deprivation	11/12729	13/76374	1.54e-07	9.15e-07	5.53e-07	BnaA02g06350D/BnaA02g31220D/BnaA06g28650D/BnaA06g38830D/BnaA06g38840D/BnaA09g03810D/BnaA10g13230D/BnaC03g55290D/BnaC07g28080D/BnaC09g03240D/BnaCnng38760D	11
GO:0042273	ribosomal large subunit biogenesis	10/12729	11/76374	1.54e-07	9.15e-07	5.53e-07	BnaA03g04430D/BnaA04g03450D/BnaA09g35240D/BnaA09g46460D/BnaAnng06530D/BnaAnng32800D/BnaC03g05950D/BnaC04g25350D/BnaC08g26570D/BnaC08g40520D	10
GO:0045694	regulation of embryo sac egg cell differentiation	10/12729	11/76374	1.54e-07	9.15e-07	5.53e-07	BnaA03g01920D/BnaA06g39950D/BnaA08g28490D/BnaA08g28500D/BnaAnng36610D/BnaAnng01630D/BnaC02g02070D/BnaC03g02440D/BnaC08g44690D/BnaCnng69360D	10
GO:0006567	threonine catabolic process	23/12729	46/76374	1.92e-07	1.14e-06	6.87e-07	BnaA01g14190D/BnaA03g01690D/BnaA03g05080D/BnaA03g21950D/BnaA03g46970D/BnaA10g19050D/BnaA10g24820D/BnaC01g16690D/BnaC03g02240D/BnaC03g06620D/BnaC03g26270D/BnaC03g63470D/BnaC03g75930D/BnaC04g11450D/BnaC04g18790D/BnaC04g18800D/BnaC04g23920D/BnaC06g16280D/BnaC06g16290D/BnaC07g39150D/BnaC08g11420D/BnaC09g42740D/BnaC09g49740D	23
GO:0006950	response to stress	93/12729	334/76374	2.04e-07	1.2e-06	7.28e-07	BnaA01g08360D/BnaA01g15720D/BnaA01g16740D/BnaA02g05440D/BnaA02g18480D/BnaA02g33970D/BnaA03g38160D/BnaA03g51380D/BnaA04g14330D/BnaA05g18880D/BnaA05g29880D/BnaA05g34310D/BnaA06g07040D/BnaA06g11260D/BnaA06g11820D/BnaA06g15320D/BnaA06g23070D/BnaA06g39800D/BnaA07g17450D/BnaA07g33440D/BnaA07g34520D/BnaA08g13690D/BnaA08g19110D/BnaA08g21280D/BnaA08g23050D/BnaA08g23230D/BnaA08g23490D/BnaA09g19430D/BnaA09g…	93
GO:0046470	phosphatidylcholine metabolic process	20/12729	37/76374	2.31e-07	1.36e-06	8.19e-07	BnaA02g09480D/BnaA02g27960D/BnaA03g24870D/BnaA03g24880D/BnaA03g36540D/BnaA08g04540D/BnaA09g21320D/BnaA10g00160D/BnaAnng13600D/BnaAnng08250D/BnaC03g62540D/BnaC03g66150D/BnaC03g72910D/BnaC03g73050D/BnaC05g00230D/BnaC08g05680D/BnaC09g23720D/BnaC09g23730D/BnaCnng23890D/BnaCnng54530D	20
GO:0070290	N-acylphosphatidylethanolamine-specific phospholipase D activity	20/12729	37/76374	2.31e-07	1.36e-06	8.19e-07	BnaA02g09480D/BnaA02g27960D/BnaA03g24870D/BnaA03g24880D/BnaA03g36540D/BnaA08g04540D/BnaA09g21320D/BnaA10g00160D/BnaAnng13600D/BnaAnng08250D/BnaC03g62540D/BnaC03g66150D/BnaC03g72910D/BnaC03g73050D/BnaC05g00230D/BnaC08g05680D/BnaC09g23720D/BnaC09g23730D/BnaCnng23890D/BnaCnng54530D	20
GO:0008612	peptidyl-lysine modification to peptidyl-hypusine	13/12729	18/76374	2.82e-07	1.65e-06	9.97e-07	BnaA07g27940D/BnaA08g19830D/BnaA09g29060D/BnaA10g24600D/BnaAnng01520D/BnaAnng01530D/BnaC02g02160D/BnaC03g57360D/BnaC05g20200D/BnaC06g30570D/BnaC07g12330D/BnaC09g49490D/BnaCnng74170D	13
GO:0009743	response to carbohydrate	41/12729	112/76374	3.02e-07	1.76e-06	1.06e-06	BnaA01g21880D/BnaA03g16450D/BnaA03g20470D/BnaA04g20970D/BnaA04g26870D/BnaA05g03550D/BnaA05g05710D/BnaA05g08310D/BnaA06g06010D/BnaA07g01140D/BnaA08g06940D/BnaA08g09410D/BnaA09g35310D/BnaAnng23370D/BnaC01g13960D/BnaC01g25090D/BnaC01g28210D/BnaC02g23650D/BnaC02g45840D/BnaC03g19820D/BnaC03g24480D/BnaC03g24500D/BnaC04g00490D/BnaC04g03080D/BnaC04g05500D/BnaC04g09330D/BnaC04g22730D/BnaC04g44970D/BnaC04g…	41
GO:0052546	cell wall pectin metabolic process	55/12729	169/76374	3.19e-07	1.85e-06	1.12e-06	BnaA01g28090D/BnaA02g04500D/BnaA03g07760D/BnaA03g16370D/BnaA03g39420D/BnaA03g60260D/BnaA03g60270D/BnaA04g11280D/BnaA05g08250D/BnaA05g23360D/BnaA05g29640D/BnaA06g09870D/BnaA06g09880D/BnaA07g03260D/BnaA07g19610D/BnaA08g26140D/BnaA08g31540D/BnaA09g08910D/BnaA09g09830D/BnaA09g11470D/BnaA09g11480D/BnaA09g14380D/BnaA10g06760D/BnaA10g15380D/BnaAnng25900D/BnaAnng07780D/BnaC01g29550D/BnaC01g29560D/BnaC02g…	55
GO:0016925	protein sumoylation	36/12729	93/76374	3.21e-07	1.86e-06	1.12e-06	BnaA01g13200D/BnaA02g04940D/BnaA02g06350D/BnaA02g31260D/BnaA03g56030D/BnaA04g02190D/BnaA04g27280D/BnaA06g07040D/BnaA06g25120D/BnaA06g28610D/BnaA06g37360D/BnaA06g38830D/BnaA06g38840D/BnaA07g01560D/BnaA07g17510D/BnaA08g16920D/BnaA09g03840D/BnaA10g13230D/BnaA10g14910D/BnaAnng34240D/BnaC01g24100D/BnaC02g39820D/BnaC03g10150D/BnaC03g55290D/BnaC03g60160D/BnaC03g74600D/BnaC04g21410D/BnaC04g23980D/BnaC05g…	36
GO:0003713	transcription coactivator activity	33/12729	82/76374	3.41e-07	1.97e-06	1.19e-06	BnaA01g04220D/BnaA03g03390D/BnaA03g04950D/BnaA03g19860D/BnaA03g24640D/BnaA03g52170D/BnaA04g01880D/BnaA05g03120D/BnaA06g27060D/BnaA07g05600D/BnaA08g12050D/BnaA09g04810D/BnaA09g55220D/BnaA10g20990D/BnaA10g22660D/BnaAnng05920D/BnaC01g05660D/BnaC02g00960D/BnaC02g26450D/BnaC03g04820D/BnaC03g06550D/BnaC03g23850D/BnaC03g29230D/BnaC03g66940D/BnaC04g23440D/BnaC04g52530D/BnaC06g16800D/BnaC07g07150D/BnaC07g…	33
GO:0008266	poly(U) RNA binding	37/12729	97/76374	3.42e-07	1.97e-06	1.19e-06	BnaA01g14120D/BnaA02g10370D/BnaA03g17080D/BnaA03g41870D/BnaA03g46910D/BnaA05g07240D/BnaA07g00970D/BnaA07g37730D/BnaA08g14640D/BnaA09g56150D/BnaA09g56170D/BnaA09g56180D/BnaA10g04770D/BnaAnng34920D/BnaAnng29860D/BnaAnng32590D/BnaC02g22410D/BnaC03g20600D/BnaC03g45400D/BnaC04g08050D/BnaC05g05110D/BnaC06g04460D/BnaC07g32940D/BnaC07g39090D/BnaC08g08910D/BnaC08g11770D/BnaC08g24510D/BnaC08g31780D/BnaC08g…	37
GO:0010229	inflorescence development	29/12729	68/76374	4.03e-07	2.31e-06	1.4e-06	BnaA02g00930D/BnaA03g20470D/BnaA03g31180D/BnaA05g03550D/BnaA06g18440D/BnaA07g10030D/BnaA07g22810D/BnaA07g23790D/BnaA07g38870D/BnaA08g20570D/BnaA09g29970D/BnaAnng37780D/BnaC02g20030D/BnaC03g24480D/BnaC03g24500D/BnaC03g36510D/BnaC03g55440D/BnaC04g03080D/BnaC04g22730D/BnaC05g18570D/BnaC06g23770D/BnaC06g24620D/BnaC06g24660D/BnaC06g43680D/BnaC07g13150D/BnaC07g29300D/BnaC08g06260D/BnaC09g45330D/BnaCnng…	29
GO:0004693	cyclin-dependent protein serine/threonine kinase activity	44/12729	125/76374	4.1e-07	2.35e-06	1.42e-06	BnaA01g10070D/BnaA01g10100D/BnaA01g20470D/BnaA02g23750D/BnaA02g30350D/BnaA02g30360D/BnaA02g31220D/BnaA03g09570D/BnaA03g14370D/BnaA04g03980D/BnaA04g04010D/BnaA05g11560D/BnaA06g28650D/BnaA06g30080D/BnaA07g36600D/BnaA08g09280D/BnaA08g09300D/BnaA08g18850D/BnaA09g03810D/BnaAnng05470D/BnaC01g11890D/BnaC01g11930D/BnaC01g25750D/BnaC02g38720D/BnaC02g47480D/BnaC02g48270D/BnaC03g12070D/BnaC03g17430D/BnaC03g…	44
GO:0006479	protein methylation	18/12729	32/76374	4.2e-07	2.39e-06	1.44e-06	BnaA01g35410D/BnaA03g32190D/BnaA03g35560D/BnaA03g51290D/BnaA05g19120D/BnaA05g26770D/BnaA08g12690D/BnaC01g07310D/BnaC01g10270D/BnaC01g14560D/BnaC01g19790D/BnaC01g32830D/BnaC03g37480D/BnaC03g41340D/BnaC03g66320D/BnaC03g77370D/BnaC05g32500D/BnaC05g40790D	18
GO:0006349	regulation of gene expression by genetic imprinting	24/12729	51/76374	4.43e-07	2.51e-06	1.52e-06	BnaA01g14770D/BnaA01g14780D/BnaA01g18110D/BnaA02g07770D/BnaA03g09860D/BnaA03g58630D/BnaA04g13630D/BnaA05g22000D/BnaA07g37430D/BnaA08g08130D/BnaA09g52610D/BnaA10g29210D/BnaAnng11080D/BnaC01g17410D/BnaC01g21540D/BnaC02g10840D/BnaC03g12490D/BnaC04g35880D/BnaC05g49460D/BnaC07g16550D/BnaC08g10770D/BnaC08g48270D/BnaC09g07810D/BnaC09g33680D	24
GO:0000303	response to superoxide	51/12729	154/76374	4.61e-07	2.61e-06	1.57e-06	BnaA01g15250D/BnaA01g20940D/BnaA01g21880D/BnaA03g16450D/BnaA03g20470D/BnaA03g47830D/BnaA04g20970D/BnaA04g26870D/BnaA05g03550D/BnaA05g05710D/BnaA05g08310D/BnaA06g06010D/BnaA07g01140D/BnaA07g29650D/BnaA08g06940D/BnaA08g09410D/BnaA08g14490D/BnaA09g35310D/BnaA10g11080D/BnaAnng23370D/BnaC01g18020D/BnaC01g23080D/BnaC01g28210D/BnaC02g23650D/BnaC03g19820D/BnaC03g24480D/BnaC03g24500D/BnaC04g00490D/BnaC04g…	51
GO:0017111	nucleoside-triphosphatase activity	75/12729	258/76374	4.83e-07	2.72e-06	1.64e-06	BnaA01g01460D/BnaA01g18700D/BnaA01g33710D/BnaA02g03790D/BnaA02g04080D/BnaA02g17220D/BnaA02g19800D/BnaA02g28790D/BnaA02g30250D/BnaA02g30300D/BnaA02g31380D/BnaA02g35050D/BnaA03g03260D/BnaA03g14540D/BnaA03g56180D/BnaA04g03180D/BnaA04g26420D/BnaA05g05110D/BnaA05g12730D/BnaA05g17060D/BnaA06g28070D/BnaA06g31950D/BnaA07g12270D/BnaA07g12280D/BnaA07g16030D/BnaA07g38370D/BnaA08g11840D/BnaA09g07700D/BnaA09g…	75
GO:0009617	response to bacterium	112/12729	430/76374	5.42e-07	3.05e-06	1.84e-06	BnaA01g21880D/BnaA01g22590D/BnaA01g30490D/BnaA01g31210D/BnaA01g31240D/BnaA01g35000D/BnaA01g35010D/BnaA01g35020D/BnaA02g29490D/BnaA02g35430D/BnaA03g10240D/BnaA03g11120D/BnaA03g27530D/BnaA03g28440D/BnaA03g32320D/BnaA03g38780D/BnaA03g39340D/BnaA03g39350D/BnaA03g44160D/BnaA03g44180D/BnaA03g56740D/BnaA04g12990D/BnaA04g15190D/BnaA05g10310D/BnaA05g37480D/BnaA06g06010D/BnaA06g06950D/BnaA06g12980D/BnaA06g…	112
GO:0032550	purine ribonucleoside binding	35/12729	91/76374	5.57e-07	3.12e-06	1.89e-06	BnaA01g33720D/BnaA02g28780D/BnaA03g03270D/BnaA04g04710D/BnaA09g07720D/BnaA09g11740D/BnaA09g11760D/BnaAnng26880D/BnaAnng26890D/BnaC01g40270D/BnaC01g42130D/BnaC02g08420D/BnaC03g04690D/BnaC03g05380D/BnaC03g48310D/BnaC03g62020D/BnaC04g27190D/BnaC04g31170D/BnaC05g19160D/BnaC05g41740D/BnaC06g01980D/BnaC07g22370D/BnaC09g07670D/BnaC09g07780D/BnaC09g12630D/BnaC09g12650D/BnaC09g18950D/BnaC09g20650D/BnaC09g…	35
GO:0050896	response to stimulus	51/12729	155/76374	5.76e-07	3.22e-06	1.94e-06	BnaA01g33720D/BnaA01g33730D/BnaA01g33790D/BnaA02g13990D/BnaA02g28780D/BnaA03g03270D/BnaA03g29580D/BnaA04g04710D/BnaA04g18920D/BnaA04g18950D/BnaA05g10540D/BnaA05g17360D/BnaA05g33170D/BnaA07g02940D/BnaA07g15420D/BnaA08g08910D/BnaA08g10100D/BnaA09g37820D/BnaA09g49480D/BnaA09g49490D/BnaAnng02790D/BnaAnng38870D/BnaAnng39160D/BnaAnng26880D/BnaAnng26890D/BnaC02g08420D/BnaC02g18840D/BnaC02g26460D/BnaC03g…	51
GO:0010252	auxin homeostasis	37/12729	99/76374	6.19e-07	3.45e-06	2.08e-06	BnaA01g14960D/BnaA01g27710D/BnaA03g34250D/BnaA04g11190D/BnaA04g26230D/BnaA05g04900D/BnaA05g23180D/BnaA07g15380D/BnaA07g30080D/BnaA08g27000D/BnaA08g28200D/BnaA08g28320D/BnaA09g50250D/BnaA09g50410D/BnaA10g03210D/BnaA10g03830D/BnaA10g30470D/BnaC01g35230D/BnaC03g39720D/BnaC04g04240D/BnaC04g50240D/BnaC05g03200D/BnaC05g03220D/BnaC05g03750D/BnaC05g36580D/BnaC06g13490D/BnaC06g33530D/BnaC07g14400D/BnaC08g…	37
GO:0010073	meristem maintenance	69/12729	233/76374	6.42e-07	3.56e-06	2.15e-06	BnaA01g10280D/BnaA01g25700D/BnaA02g12070D/BnaA02g18100D/BnaA02g29370D/BnaA03g02430D/BnaA03g35550D/BnaA03g39420D/BnaA04g15560D/BnaA04g18070D/BnaA05g06270D/BnaA05g06280D/BnaA05g11420D/BnaA05g16620D/BnaA05g19140D/BnaA05g24850D/BnaA06g02830D/BnaA06g12580D/BnaA06g31340D/BnaA07g03260D/BnaA07g13010D/BnaA07g19750D/BnaA07g32710D/BnaA07g35820D/BnaA07g35870D/BnaA07g35880D/BnaA07g38260D/BnaA08g22640D/BnaA09g…	69
GO:0004630	phospholipase D activity	21/12729	42/76374	6.5e-07	3.59e-06	2.17e-06	BnaA02g09480D/BnaA02g27960D/BnaA03g24870D/BnaA03g24880D/BnaA03g36540D/BnaA08g04540D/BnaA09g21320D/BnaA10g00160D/BnaAnng13600D/BnaAnng08250D/BnaC03g62540D/BnaC03g66150D/BnaC03g72910D/BnaC03g73050D/BnaC05g00230D/BnaC08g05680D/BnaC08g46860D/BnaC09g23720D/BnaC09g23730D/BnaCnng23890D/BnaCnng54530D	21
GO:0008553	proton-exporting ATPase activity, phosphorylative mechanism	21/12729	42/76374	6.5e-07	3.59e-06	2.17e-06	BnaA03g02630D/BnaA03g50340D/BnaA04g27340D/BnaA09g09830D/BnaA09g18100D/BnaA09g38390D/BnaA10g22780D/BnaAnng07780D/BnaC02g02940D/BnaC02g14310D/BnaC03g03730D/BnaC04g22140D/BnaC05g24020D/BnaC07g02580D/BnaC08g06660D/BnaC08g30540D/BnaC09g47340D/BnaCnng30540D/BnaCnng39300D/BnaCnng39310D/BnaCnng44750D	21
GO:0004071	aspartate-ammonia ligase activity	10/12729	12/76374	7.84e-07	4.23e-06	2.56e-06	BnaA03g02840D/BnaA04g05900D/BnaA06g23950D/BnaA10g29020D/BnaC03g04190D/BnaC03g14950D/BnaC03g49300D/BnaC04g03150D/BnaC07g34700D/BnaC07g35580D	10
GO:0009186	deoxyribonucleoside diphosphate metabolic process	10/12729	12/76374	7.84e-07	4.23e-06	2.56e-06	BnaA02g28570D/BnaA06g32440D/BnaA07g06360D/BnaA09g16580D/BnaC01g30580D/BnaC02g36630D/BnaC03g59410D/BnaC03g59420D/BnaC07g07940D/BnaC07g48980D	10
GO:0009923	fatty acid elongase complex	10/12729	12/76374	7.84e-07	4.23e-06	2.56e-06	BnaA01g15170D/BnaA03g02950D/BnaA03g47710D/BnaA10g21780D/BnaC01g41560D/BnaC03g04350D/BnaC06g24760D/BnaC07g39990D/BnaC08g12060D/BnaC09g46070D	10
GO:0016274	protein-arginine N-methyltransferase activity	10/12729	12/76374	7.84e-07	4.23e-06	2.56e-06	BnaA01g07340D/BnaA03g49570D/BnaA07g01100D/BnaA08g13390D/BnaC01g09010D/BnaC03g68330D/BnaC07g01550D/BnaC07g02260D/BnaC07g41980D/BnaC07g50720D	10
GO:0071454	cellular response to anoxia	10/12729	12/76374	7.84e-07	4.23e-06	2.56e-06	BnaA03g21770D/BnaA04g26990D/BnaA05g00550D/BnaA07g19320D/BnaA09g39860D/BnaC03g26040D/BnaC04g51320D/BnaC04g51970D/BnaC06g18520D/BnaC08g32210D	10
GO:0080023	3R-hydroxyacyl-CoA dehydratase activity	10/12729	12/76374	7.84e-07	4.23e-06	2.56e-06	BnaA01g15170D/BnaA03g02950D/BnaA03g47710D/BnaA10g21780D/BnaC01g41560D/BnaC03g04350D/BnaC06g24760D/BnaC07g39990D/BnaC08g12060D/BnaC09g46070D	10
GO:0080153	negative regulation of reductive pentose-phosphate cycle	10/12729	12/76374	7.84e-07	4.23e-06	2.56e-06	BnaA03g21770D/BnaA04g26990D/BnaA05g00550D/BnaA07g19320D/BnaA09g39860D/BnaC03g26040D/BnaC04g51320D/BnaC04g51970D/BnaC06g18520D/BnaC08g32210D	10
GO:0002020	protease binding	23/12729	49/76374	8.11e-07	4.37e-06	2.64e-06	BnaA03g39320D/BnaA03g39360D/BnaA03g59360D/BnaA06g03820D/BnaA09g05850D/BnaA09g05860D/BnaA09g29090D/BnaA10g27060D/BnaA10g27070D/BnaA10g27080D/BnaAnng12060D/BnaAnng12070D/BnaC01g27600D/BnaC03g46680D/BnaC03g46690D/BnaC04g18270D/BnaC04g18290D/BnaC04g42010D/BnaC04g42020D/BnaC05g20170D/BnaC06g01970D/BnaCnng03460D/BnaCnng03470D	23
GO:0004637	phosphoribosylamine-glycine ligase activity	9/12729	10/76374	8.42e-07	4.5e-06	2.72e-06	BnaA03g27160D/BnaA06g05760D/BnaA07g03700D/BnaA08g26110D/BnaC03g50420D/BnaC03g57930D/BnaC05g07310D/BnaC08g13890D/BnaC08g14960D	9
GO:0031981	nuclear lumen	9/12729	10/76374	8.42e-07	4.5e-06	2.72e-06	BnaA02g26750D/BnaA09g45180D/BnaAnng25590D/BnaC02g48020D/BnaC03g23700D/BnaC05g13210D/BnaC05g13220D/BnaC08g38000D/BnaC08g47410D	9
GO:0032559	adenyl ribonucleotide binding	34/12729	89/76374	9.65e-07	5.15e-06	3.11e-06	BnaA01g33720D/BnaA02g28780D/BnaA03g03270D/BnaA04g04710D/BnaA09g07720D/BnaA09g11740D/BnaA09g11760D/BnaAnng26880D/BnaAnng26890D/BnaC01g40270D/BnaC01g42130D/BnaC02g08420D/BnaC03g04690D/BnaC03g05380D/BnaC03g48310D/BnaC03g62020D/BnaC04g27190D/BnaC04g31170D/BnaC05g19160D/BnaC05g41740D/BnaC07g22370D/BnaC09g07670D/BnaC09g07780D/BnaC09g12630D/BnaC09g12650D/BnaC09g18950D/BnaC09g20650D/BnaC09g39460D/BnaC09g…	34
GO:0016538	cyclin-dependent protein serine/threonine kinase regulator activity	37/12729	102/76374	1.44e-06	7.67e-06	4.63e-06	BnaA01g00430D/BnaA02g31220D/BnaA03g01900D/BnaA03g46850D/BnaA06g14500D/BnaA06g25730D/BnaA06g28650D/BnaA07g03310D/BnaA07g21450D/BnaA07g32610D/BnaA07g36800D/BnaA08g21740D/BnaA09g03810D/BnaA09g09200D/BnaA09g28170D/BnaA10g21170D/BnaA10g26520D/BnaAnng23850D/BnaAnng30800D/BnaAnng01620D/BnaC01g01420D/BnaC01g44890D/BnaC02g02080D/BnaC02g27330D/BnaC03g02420D/BnaC03g47840D/BnaC05g15900D/BnaC05g15910D/BnaC06g…	37
GO:0003727	single-stranded RNA binding	22/12729	47/76374	1.49e-06	7.86e-06	4.75e-06	BnaA01g21840D/BnaA03g01270D/BnaA04g13630D/BnaA05g28360D/BnaA08g27630D/BnaA09g14620D/BnaA10g02250D/BnaA10g25740D/BnaAnng09670D/BnaAnng00940D/BnaC01g28150D/BnaC02g02730D/BnaC03g55360D/BnaC03g71240D/BnaC04g28320D/BnaC04g35880D/BnaC05g02170D/BnaC05g42530D/BnaC07g03720D/BnaC08g00380D/BnaC09g15260D/BnaC09g50550D	22
GO:0055046	microgametogenesis	22/12729	47/76374	1.49e-06	7.86e-06	4.75e-06	BnaA01g25500D/BnaA02g01270D/BnaA03g04040D/BnaA03g31660D/BnaA05g27710D/BnaA06g31470D/BnaA07g00820D/BnaA07g22320D/BnaA07g31390D/BnaA10g24710D/BnaA10g29990D/BnaAnng34070D/BnaC02g04360D/BnaC02g22850D/BnaC02g37370D/BnaC03g05640D/BnaC03g37160D/BnaC05g41880D/BnaC06g18130D/BnaC06g23160D/BnaC09g44190D/BnaC09g49640D	22
GO:0051276	chromosome organization	21/12729	44/76374	1.73e-06	9.1e-06	5.5e-06	BnaA01g26090D/BnaA02g00920D/BnaA04g03980D/BnaA04g04010D/BnaA05g20560D/BnaA08g27630D/BnaA10g02250D/BnaA10g21200D/BnaAnng09670D/BnaC01g33330D/BnaC03g55360D/BnaC04g26000D/BnaC04g26090D/BnaC04g28320D/BnaC05g02170D/BnaC05g33320D/BnaC07g03720D/BnaC08g00380D/BnaC09g45380D/BnaCnng20200D/BnaUnng02190D	21
GO:0043168	anion binding	34/12729	91/76374	1.75e-06	9.18e-06	5.55e-06	BnaA01g33720D/BnaA02g28780D/BnaA03g03270D/BnaA04g04710D/BnaA09g07720D/BnaA09g11740D/BnaA09g11760D/BnaAnng26880D/BnaAnng26890D/BnaC01g40270D/BnaC01g42130D/BnaC02g08420D/BnaC03g04690D/BnaC03g05380D/BnaC03g48310D/BnaC03g62020D/BnaC04g27190D/BnaC04g31170D/BnaC05g19160D/BnaC05g41740D/BnaC07g22370D/BnaC09g07670D/BnaC09g07780D/BnaC09g12630D/BnaC09g12650D/BnaC09g18950D/BnaC09g20650D/BnaC09g39460D/BnaC09g…	34
GO:0009864	induced systemic resistance, jasmonic acid mediated signaling pathway	23/12729	51/76374	1.94e-06	1.02e-05	6.14e-06	BnaA02g06350D/BnaA03g20470D/BnaA04g03040D/BnaA04g23860D/BnaA05g02160D/BnaA05g03550D/BnaA06g38830D/BnaA06g38840D/BnaA07g17180D/BnaA09g36500D/BnaA10g13230D/BnaC02g38200D/BnaC03g24480D/BnaC03g24500D/BnaC03g55290D/BnaC04g01830D/BnaC04g03080D/BnaC04g22730D/BnaC04g24530D/BnaC04g47620D/BnaC08g28070D/BnaCnng38760D/BnaCnng07590D	23
GO:0009790	embryo development	78/12729	281/76374	2.1e-06	1.1e-05	6.63e-06	BnaA01g10430D/BnaA01g11370D/BnaA01g27710D/BnaA02g18300D/BnaA02g18370D/BnaA02g22840D/BnaA02g24400D/BnaA03g34250D/BnaA03g56560D/BnaA04g11900D/BnaA04g18120D/BnaA04g22690D/BnaA04g26660D/BnaA05g03310D/BnaA05g05350D/BnaA05g05600D/BnaA05g11440D/BnaA05g11590D/BnaA05g23180D/BnaA05g36780D/BnaA06g15360D/BnaA06g15500D/BnaA06g36060D/BnaA07g10870D/BnaA07g33590D/BnaA08g06940D/BnaA08g21180D/BnaA08g21240D/BnaA09g…	78
GO:0010050	vegetative phase change	81/12729	295/76374	2.16e-06	1.12e-05	6.79e-06	BnaA01g10280D/BnaA01g25700D/BnaA01g33280D/BnaA02g29370D/BnaA02g29720D/BnaA02g32860D/BnaA03g08110D/BnaA03g27640D/BnaA03g35550D/BnaA03g39050D/BnaA03g50840D/BnaA04g18070D/BnaA05g06270D/BnaA05g06280D/BnaA05g16620D/BnaA05g19140D/BnaA05g34100D/BnaA06g02830D/BnaA06g12580D/BnaA06g19710D/BnaA06g24570D/BnaA06g31030D/BnaA06g31340D/BnaA07g04040D/BnaA07g35820D/BnaA07g38260D/BnaA08g11650D/BnaA08g22640D/BnaA09g…	81
GO:0009759	indole glucosinolate biosynthetic process	18/12729	35/76374	2.43e-06	1.26e-05	7.61e-06	BnaA03g39790D/BnaA06g12690D/BnaA06g12700D/BnaA07g31220D/BnaA08g22580D/BnaA09g05480D/BnaA09g44500D/BnaAnng06630D/BnaAnng06640D/BnaC02g41860D/BnaC05g14250D/BnaC06g34910D/BnaC08g18080D/BnaC08g18090D/BnaC08g37160D/BnaC09g05060D/BnaCnng21270D/BnaCnng49840D	18
GO:0006417	regulation of translation	39/12729	112/76374	2.46e-06	1.27e-05	7.7e-06	BnaA01g13120D/BnaA01g16170D/BnaA01g26980D/BnaA03g12420D/BnaA03g48450D/BnaA05g22070D/BnaA05g34060D/BnaA05g36460D/BnaA06g03620D/BnaA06g12310D/BnaA08g04480D/BnaA08g14130D/BnaA08g22790D/BnaA09g44710D/BnaA10g06550D/BnaAnng11210D/BnaC01g19290D/BnaC01g34460D/BnaC01g35030D/BnaC03g15180D/BnaC03g40920D/BnaC03g55890D/BnaC05g34800D/BnaC05g35350D/BnaC05g48640D/BnaC05g50130D/BnaC06g07070D/BnaC06g40840D/BnaC07g…	39
GO:0000380	alternative mRNA splicing, via spliceosome	15/12729	26/76374	2.54e-06	1.31e-05	7.93e-06	BnaA01g05410D/BnaA03g18380D/BnaA03g18390D/BnaA04g12350D/BnaA05g28760D/BnaA08g16610D/BnaAnng35580D/BnaC01g00280D/BnaC02g23610D/BnaC03g21900D/BnaC03g60490D/BnaC05g43230D/BnaC07g08560D/BnaC08g49360D/BnaUnng05060D	15
GO:0006189	'de novo' IMP biosynthetic process	16/12729	29/76374	2.63e-06	1.35e-05	8.17e-06	BnaA01g35320D/BnaA06g40040D/BnaA07g16600D/BnaA07g22320D/BnaA07g31390D/BnaA09g25330D/BnaA09g54810D/BnaC01g41710D/BnaC02g18370D/BnaC02g22850D/BnaC06g15570D/BnaC06g23160D/BnaC07g20200D/BnaC08g25860D/BnaCnng21160D/BnaCnng40800D	16
GO:0009870	defense response signaling pathway, resistance gene-dependent	28/12729	70/76374	2.97e-06	1.52e-05	9.17e-06	BnaA01g27690D/BnaA02g23810D/BnaA03g42250D/BnaA05g17840D/BnaA05g21980D/BnaA06g05660D/BnaA08g26150D/BnaA09g14230D/BnaA09g32090D/BnaA09g36280D/BnaC01g22210D/BnaC01g34430D/BnaC01g35220D/BnaC03g53900D/BnaC05g07200D/BnaC05g28240D/BnaC05g32870D/BnaC05g35230D/BnaC07g33310D/BnaC07g33960D/BnaC07g35960D/BnaC08g13850D/BnaC08g22900D/BnaC08g27840D/BnaC09g14760D/BnaC09g18950D/BnaC09g19010D/BnaC09g40060D	28
GO:0010582	floral meristem determinacy	28/12729	70/76374	2.97e-06	1.52e-05	9.17e-06	BnaA02g01960D/BnaA03g04650D/BnaA04g03040D/BnaA04g03530D/BnaA04g12990D/BnaA04g23860D/BnaA05g02160D/BnaA07g04040D/BnaA07g17180D/BnaA09g35160D/BnaA09g36500D/BnaA09g42480D/BnaA10g19620D/BnaC02g05100D/BnaC02g38200D/BnaC03g06180D/BnaC04g01830D/BnaC04g24530D/BnaC04g25420D/BnaC04g35060D/BnaC04g47620D/BnaC07g05260D/BnaC08g26410D/BnaC08g28070D/BnaC08g34920D/BnaC09g08810D/BnaC09g43180D/BnaCnng07590D	28
GO:0006006	glucose metabolic process	12/12729	18/76374	3.13e-06	1.6e-05	9.64e-06	BnaA03g39350D/BnaA05g34310D/BnaA07g17450D/BnaAnng11210D/BnaAnng30290D/BnaC02g31420D/BnaC03g46690D/BnaC03g46700D/BnaC04g22280D/BnaC04g23180D/BnaC09g46110D/BnaCnng15160D	12
GO:0044238	primary metabolic process	38/12729	109/76374	3.19e-06	1.62e-05	9.79e-06	BnaA02g22700D/BnaA02g30080D/BnaA02g34990D/BnaA03g03500D/BnaA03g19760D/BnaA03g27960D/BnaA06g39480D/BnaA07g24350D/BnaA09g23560D/BnaA09g52320D/BnaA10g21630D/BnaAnng38040D/BnaAnng20140D/BnaC01g13450D/BnaC01g23510D/BnaC01g28560D/BnaC02g18840D/BnaC02g38510D/BnaC03g41540D/BnaC03g52650D/BnaC03g67780D/BnaC04g06400D/BnaC04g22320D/BnaC05g08830D/BnaC06g07680D/BnaC06g32370D/BnaC07g14590D/BnaC07g21560D/BnaC08g…	38
GO:0010332	response to gamma radiation	77/12729	280/76374	3.55e-06	1.8e-05	1.09e-05	BnaA01g00430D/BnaA01g05690D/BnaA01g12740D/BnaA01g19000D/BnaA01g21040D/BnaA02g06560D/BnaA02g17350D/BnaA02g36520D/BnaA03g01900D/BnaA03g26210D/BnaA03g29520D/BnaA03g45660D/BnaA04g11880D/BnaA05g06130D/BnaA05g07810D/BnaA05g20990D/BnaA06g07950D/BnaA06g16810D/BnaA06g18830D/BnaA06g20800D/BnaA06g26280D/BnaA07g03310D/BnaA08g16340D/BnaA08g18720D/BnaA09g05230D/BnaA10g22970D/BnaA10g30270D/BnaAnng38300D/BnaAnng…	77
GO:0071215	cellular response to abscisic acid stimulus	32/12729	86/76374	3.85e-06	1.95e-05	1.18e-05	BnaA01g13120D/BnaA01g26980D/BnaA02g31000D/BnaA03g04430D/BnaA04g03450D/BnaA05g22070D/BnaA05g36460D/BnaA06g03620D/BnaA06g12310D/BnaA06g29270D/BnaA08g22790D/BnaA09g35240D/BnaA09g44710D/BnaAnng11210D/BnaC01g34460D/BnaC01g35030D/BnaC02g39310D/BnaC03g05950D/BnaC03g55890D/BnaC04g25350D/BnaC05g34800D/BnaC05g35350D/BnaC05g50130D/BnaC06g40840D/BnaC07g27440D/BnaC08g03440D/BnaC08g03480D/BnaC08g17760D/BnaC08g…	32
GO:0004814	arginine-tRNA ligase activity	9/12729	11/76374	3.94e-06	1.96e-05	1.19e-05	BnaA01g15450D/BnaA03g47930D/BnaA05g25590D/BnaA08g14390D/BnaC01g18350D/BnaC07g40180D/BnaC08g12170D/BnaCnng64110D/BnaUnng02170D	9
GO:0006420	arginyl-tRNA aminoacylation	9/12729	11/76374	3.94e-06	1.96e-05	1.19e-05	BnaA01g15450D/BnaA03g47930D/BnaA05g25590D/BnaA08g14390D/BnaC01g18350D/BnaC07g40180D/BnaC08g12170D/BnaCnng64110D/BnaUnng02170D	9
GO:0031463	Cul3-RING ubiquitin ligase complex	9/12729	11/76374	3.94e-06	1.96e-05	1.19e-05	BnaA02g04940D/BnaA03g56030D/BnaA06g37360D/BnaA08g16920D/BnaA10g14910D/BnaC03g10150D/BnaC03g60160D/BnaC07g47630D/BnaC09g37280D	9
GO:0035246	peptidyl-arginine N-methylation	9/12729	11/76374	3.94e-06	1.96e-05	1.19e-05	BnaA01g07340D/BnaA03g49570D/BnaA07g01100D/BnaA08g13390D/BnaC01g09010D/BnaC07g01550D/BnaC07g02260D/BnaC07g41980D/BnaC07g50720D	9
GO:0042178	xenobiotic catabolic process	9/12729	11/76374	3.94e-06	1.96e-05	1.19e-05	BnaA02g20270D/BnaA09g00210D/BnaA09g00220D/BnaAnng24330D/BnaAnng24340D/BnaC02g27750D/BnaC03g31760D/BnaC03g31770D/BnaCnng01870D	9
GO:0006012	galactose metabolic process	36/12729	102/76374	4.13e-06	2.06e-05	1.24e-05	BnaA01g10650D/BnaA01g13540D/BnaA01g27130D/BnaA03g05250D/BnaA03g27550D/BnaA05g09030D/BnaA05g22280D/BnaA06g17140D/BnaA07g36950D/BnaA09g12250D/BnaA09g17150D/BnaA09g22180D/BnaA09g25900D/BnaA10g18960D/BnaAnng39400D/BnaAnng10090D/BnaC01g12180D/BnaC01g15760D/BnaC01g21330D/BnaC01g34580D/BnaC03g06790D/BnaC03g32560D/BnaC03g57220D/BnaC05g15460D/BnaC05g20020D/BnaC05g23640D/BnaC05g23970D/BnaC05g35520D/BnaC07g…	36
GO:0042372	phylloquinone biosynthetic process	17/12729	33/76374	4.49e-06	2.22e-05	1.34e-05	BnaA02g14110D/BnaA06g08060D/BnaA06g13060D/BnaA07g22090D/BnaA08g22340D/BnaC02g18740D/BnaC02g40220D/BnaC05g14570D/BnaC05g19790D/BnaC06g04430D/BnaC06g22820D/BnaC06g35540D/BnaC07g12250D/BnaC08g18420D/BnaC08g37000D/BnaC08g48240D/BnaCnng08300D	17
GO:0048229	gametophyte development	17/12729	33/76374	4.49e-06	2.22e-05	1.34e-05	BnaA03g14370D/BnaA03g40550D/BnaA04g03980D/BnaA04g04010D/BnaA05g11560D/BnaA06g24650D/BnaAnng26370D/BnaC02g05440D/BnaC02g32660D/BnaC03g17430D/BnaC04g13490D/BnaC04g26000D/BnaC04g26090D/BnaC04g42140D/BnaC07g31500D/BnaCnng13280D/BnaUnng02190D	17
GO:0009396	folic acid-containing compound biosynthetic process	15/12729	27/76374	4.84e-06	2.38e-05	1.44e-05	BnaA03g25950D/BnaA03g32210D/BnaA05g26750D/BnaA07g21280D/BnaA09g51830D/BnaC03g30540D/BnaC03g37500D/BnaC05g40770D/BnaC06g21660D/BnaC07g02660D/BnaC07g02720D/BnaC07g02730D/BnaCnng22920D/BnaCnng31000D/BnaCnng02210D	15
GO:0016707	gibberellin 3-beta-dioxygenase activity	11/12729	16/76374	5.25e-06	2.58e-05	1.56e-05	BnaA02g19810D/BnaA02g19820D/BnaA06g10250D/BnaA07g35700D/BnaA07g35710D/BnaA09g57140D/BnaC02g23180D/BnaC02g23190D/BnaC05g11920D/BnaC06g40640D/BnaC08g38810D	11
GO:0004069	L-aspartate:2-oxoglutarate aminotransferase activity	21/12729	47/76374	6.45e-06	3.16e-05	1.91e-05	BnaA01g04910D/BnaA02g04300D/BnaA03g03400D/BnaA03g51850D/BnaA03g54610D/BnaA04g28670D/BnaA05g11710D/BnaA09g10660D/BnaA09g12700D/BnaA10g15590D/BnaC01g06460D/BnaC02g03850D/BnaC02g08820D/BnaC03g04830D/BnaC04g19940D/BnaC04g36800D/BnaC04g41630D/BnaC04g54310D/BnaC09g13020D/BnaC09g54080D/BnaCnng72730D	21
GO:0048444	floral organ morphogenesis	18/12729	37/76374	6.73e-06	3.29e-05	1.99e-05	BnaA01g32490D/BnaA03g29810D/BnaA05g30500D/BnaA05g32630D/BnaA05g32640D/BnaA09g28260D/BnaA10g00440D/BnaA10g17240D/BnaC03g35050D/BnaC03g64230D/BnaC05g00510D/BnaC05g44940D/BnaC05g47760D/BnaC05g47770D/BnaC09g40420D/BnaCnng68300D/BnaCnng28010D/BnaCnng52210D	18
GO:0010501	RNA secondary structure unwinding	12/12729	19/76374	7.2e-06	3.51e-05	2.12e-05	BnaA01g01560D/BnaA03g18380D/BnaA03g18390D/BnaA04g12350D/BnaAnng35580D/BnaAnng26260D/BnaAnng08360D/BnaC03g21900D/BnaC07g08560D/BnaC08g49360D/BnaCnng42010D/BnaUnng05060D	12
GO:0009791	post-embryonic development	28/12729	73/76374	7.74e-06	3.76e-05	2.27e-05	BnaA01g19810D/BnaA02g13990D/BnaA06g18060D/BnaA06g25100D/BnaA06g32030D/BnaA09g37820D/BnaA09g56360D/BnaA10g12680D/BnaC01g24480D/BnaC02g13160D/BnaC02g36970D/BnaC02g37640D/BnaC03g08560D/BnaC03g55910D/BnaC03g57650D/BnaC04g33800D/BnaC05g12370D/BnaC06g32510D/BnaC06g43780D/BnaC07g14590D/BnaC07g24450D/BnaC08g03800D/BnaC08g16910D/BnaC08g38420D/BnaCnng68410D/BnaCnng45070D/BnaCnng51850D/BnaCnng51860D	28
GO:0009678	pyrophosphate hydrolysis-driven proton transmembrane transporter activity	16/12729	31/76374	8.31e-06	4.03e-05	2.43e-05	BnaA06g10340D/BnaA06g38620D/BnaA07g34510D/BnaA07g35600D/BnaA08g23780D/BnaA09g56670D/BnaAnng30840D/BnaAnng33120D/BnaC05g11930D/BnaC06g39260D/BnaC06g39350D/BnaC06g40530D/BnaC08g16730D/BnaC08g38730D/BnaCnng64390D/BnaCnng66360D	16
GO:0042274	ribosomal small subunit biogenesis	13/12729	22/76374	8.41e-06	4.07e-05	2.46e-05	BnaA01g05130D/BnaA03g05840D/BnaA03g28000D/BnaA05g33460D/BnaA08g30710D/BnaA10g18170D/BnaC01g06790D/BnaC01g41990D/BnaC03g07580D/BnaC03g33030D/BnaC03g77310D/BnaC05g48210D/BnaC09g41680D	13
GO:0032508	DNA duplex unwinding	30/12729	81/76374	8.5e-06	4.09e-05	2.47e-05	BnaA01g01560D/BnaA02g05570D/BnaA02g29040D/BnaA03g08480D/BnaA03g18380D/BnaA03g18390D/BnaA04g11900D/BnaA04g12350D/BnaA06g24900D/BnaA07g02430D/BnaA09g07260D/BnaA09g43450D/BnaA10g14040D/BnaAnng35580D/BnaAnng26260D/BnaAnng08360D/BnaC02g09460D/BnaC02g37070D/BnaC03g10810D/BnaC03g21900D/BnaC03g48680D/BnaC04g16180D/BnaC05g38040D/BnaC07g08560D/BnaC07g11440D/BnaC08g49360D/BnaC09g07130D/BnaCnng30150D/BnaCnng…	30
GO:0004349	glutamate 5-kinase activity	10/12729	14/76374	8.57e-06	4.09e-05	2.47e-05	BnaA03g18760D/BnaA04g03460D/BnaA04g22810D/BnaA05g05760D/BnaA09g35230D/BnaC03g72600D/BnaC04g05620D/BnaC04g46630D/BnaC04g55570D/BnaC08g26550D	10
GO:0006090	pyruvate metabolic process	10/12729	14/76374	8.57e-06	4.09e-05	2.47e-05	BnaA03g33170D/BnaA04g05600D/BnaA04g05610D/BnaA05g25500D/BnaA06g00560D/BnaC03g38230D/BnaC04g28350D/BnaC06g07040D/BnaC08g23510D/BnaCnng28440D	10
GO:0010111	glyoxysome organization	10/12729	14/76374	8.57e-06	4.09e-05	2.47e-05	BnaA03g15290D/BnaA04g19180D/BnaA05g10480D/BnaA08g28040D/BnaC02g18580D/BnaC03g18470D/BnaC03g47990D/BnaC04g11470D/BnaC04g43560D/BnaC08g00920D	10
GO:0060776	simple leaf morphogenesis	10/12729	14/76374	8.57e-06	4.09e-05	2.47e-05	BnaA07g08860D/BnaA07g37360D/BnaA09g27990D/BnaAnng15250D/BnaAnng05130D/BnaC02g16720D/BnaC05g21250D/BnaC07g11360D/BnaC09g07260D/BnaCnng56620D	10
GO:0006351	transcription, DNA-templated	80/12729	301/76374	9.34e-06	4.44e-05	2.68e-05	BnaA01g04100D/BnaA01g10070D/BnaA01g17530D/BnaA01g36190D/BnaA02g14670D/BnaA03g07780D/BnaA03g09990D/BnaA03g36610D/BnaA04g02440D/BnaA04g04070D/BnaA04g15160D/BnaA04g23840D/BnaA05g16440D/BnaA05g17270D/BnaA05g30810D/BnaA06g07130D/BnaA06g29470D/BnaA07g04260D/BnaA07g07550D/BnaA07g07580D/BnaA08g22830D/BnaA08g25270D/BnaA08g28730D/BnaA09g06260D/BnaA09g08480D/BnaA09g20810D/BnaA09g22420D/BnaA09g36430D/BnaA09g…	80
GO:0045036	protein targeting to chloroplast	57/12729	196/76374	1.04e-05	4.94e-05	2.98e-05	BnaA01g13780D/BnaA01g13790D/BnaA01g14120D/BnaA01g16510D/BnaA01g29950D/BnaA01g30190D/BnaA02g18970D/BnaA02g25120D/BnaA03g19990D/BnaA03g41650D/BnaA03g46660D/BnaA03g46910D/BnaA03g48640D/BnaA04g05670D/BnaA04g17760D/BnaA04g19830D/BnaA04g27460D/BnaA05g26270D/BnaA07g34280D/BnaA08g14070D/BnaA08g14640D/BnaA08g14780D/BnaA09g32610D/BnaA09g32620D/BnaA09g32640D/BnaA09g39610D/BnaA10g12350D/BnaC01g16200D/BnaC01g…	57
GO:0006091	generation of precursor metabolites and energy	30/12729	82/76374	1.13e-05	5.33e-05	3.22e-05	BnaA01g34110D/BnaA01g34120D/BnaA01g34150D/BnaA01g34210D/BnaA02g23810D/BnaA03g28320D/BnaA05g32840D/BnaA06g19340D/BnaA06g19350D/BnaA06g19380D/BnaA08g27790D/BnaA09g32090D/BnaA09g50580D/BnaA10g02510D/BnaC02g41150D/BnaC03g03830D/BnaC03g31130D/BnaC03g31140D/BnaC03g33480D/BnaC03g58110D/BnaC04g37140D/BnaC05g02380D/BnaC05g48140D/BnaC07g35960D/BnaC08g00580D/BnaC08g22900D/BnaC08g43840D/BnaC09g18950D/BnaC09g…	30
GO:0010048	vernalization response	107/12729	433/76374	1.21e-05	5.73e-05	3.46e-05	BnaA01g04030D/BnaA01g18110D/BnaA01g20470D/BnaA02g08140D/BnaA02g17790D/BnaA02g29470D/BnaA02g35530D/BnaA03g00210D/BnaA03g06690D/BnaA03g07560D/BnaA03g16880D/BnaA03g18520D/BnaA03g26720D/BnaA03g35810D/BnaA04g01450D/BnaA04g04410D/BnaA04g13630D/BnaA04g21150D/BnaA04g23190D/BnaA05g05170D/BnaA05g20380D/BnaA05g29610D/BnaA06g14070D/BnaA06g23990D/BnaA06g31250D/BnaA06g34560D/BnaA06g37110D/BnaA07g00690D/BnaA07g…	107
GO:0032549	ribonucleoside binding	17/12729	35/76374	1.24e-05	5.85e-05	3.54e-05	BnaA01g11530D/BnaA02g06560D/BnaA03g44840D/BnaA07g07550D/BnaA07g07580D/BnaA08g09570D/BnaA08g10000D/BnaC01g13030D/BnaC01g13040D/BnaC03g63980D/BnaC03g64530D/BnaC03g64540D/BnaC04g01050D/BnaC05g31530D/BnaC07g09390D/BnaC07g36840D/BnaCnng64900D	17
GO:0003006	developmental process involved in reproduction	11/12729	17/76374	1.26e-05	5.92e-05	3.58e-05	BnaA01g33280D/BnaA02g29720D/BnaA03g27640D/BnaA05g34100D/BnaA06g31030D/BnaA08g27560D/BnaC02g37730D/BnaC05g48600D/BnaC07g25610D/BnaC08g00320D/BnaCnng29110D	11
GO:0032204	regulation of telomere maintenance	52/12729	175/76374	1.29e-05	6e-05	3.63e-05	BnaA01g05690D/BnaA01g12740D/BnaA02g06560D/BnaA02g17350D/BnaA03g29520D/BnaA03g45660D/BnaA04g11880D/BnaA05g06130D/BnaA05g07810D/BnaA05g20990D/BnaA06g16810D/BnaA06g18830D/BnaA06g20800D/BnaA06g26280D/BnaA08g16340D/BnaA08g18720D/BnaA09g05230D/BnaA10g22970D/BnaA10g30270D/BnaAnng27490D/BnaAnng09050D/BnaAnng31980D/BnaC01g00570D/BnaC01g14470D/BnaC02g23590D/BnaC02g25530D/BnaC03g53260D/BnaC03g53270D/BnaC03g…	52
GO:0043247	telomere maintenance in response to DNA damage	52/12729	175/76374	1.29e-05	6e-05	3.63e-05	BnaA01g05690D/BnaA01g12740D/BnaA02g06560D/BnaA02g17350D/BnaA03g29520D/BnaA03g45660D/BnaA04g11880D/BnaA05g06130D/BnaA05g07810D/BnaA05g20990D/BnaA06g16810D/BnaA06g18830D/BnaA06g20800D/BnaA06g26280D/BnaA08g16340D/BnaA08g18720D/BnaA09g05230D/BnaA10g22970D/BnaA10g30270D/BnaAnng27490D/BnaAnng09050D/BnaAnng31980D/BnaC01g00570D/BnaC01g14470D/BnaC02g23590D/BnaC02g25530D/BnaC03g53260D/BnaC03g53270D/BnaC03g…	52
GO:0006529	asparagine biosynthetic process	9/12729	12/76374	1.34e-05	6.22e-05	3.76e-05	BnaA03g40710D/BnaA09g12410D/BnaA10g29020D/BnaC03g14950D/BnaC03g51880D/BnaC04g03150D/BnaC07g34700D/BnaC07g35580D/BnaC09g12810D	9
GO:0031519	PcG protein complex	9/12729	12/76374	1.34e-05	6.22e-05	3.76e-05	BnaA01g06810D/BnaA04g13630D/BnaA08g13150D/BnaAnng10940D/BnaC01g08200D/BnaC03g68030D/BnaC03g74580D/BnaC04g35880D/BnaCnng18840D	9
GO:0043295	glutathione binding	24/12729	60/76374	1.48e-05	6.84e-05	4.13e-05	BnaA02g20640D/BnaA03g14140D/BnaA03g14150D/BnaA03g26130D/BnaA03g26140D/BnaA04g17910D/BnaA05g00270D/BnaA08g27280D/BnaA09g00850D/BnaA09g00870D/BnaA10g01510D/BnaAnng37730D/BnaC03g17110D/BnaC03g17120D/BnaC03g26120D/BnaC03g30870D/BnaC03g30880D/BnaC04g00150D/BnaC04g41510D/BnaC05g01540D/BnaC08g00080D/BnaCnng47740D/BnaCnng19060D/BnaCnng19070D	24
GO:0048768	root hair cell tip growth	24/12729	60/76374	1.48e-05	6.84e-05	4.13e-05	BnaA01g07540D/BnaA01g27710D/BnaA03g21080D/BnaA03g34250D/BnaA04g01210D/BnaA05g23180D/BnaA07g37990D/BnaA09g06920D/BnaA09g34700D/BnaAnng18540D/BnaAnng18550D/BnaC01g09210D/BnaC01g35230D/BnaC03g25140D/BnaC03g39720D/BnaC04g22080D/BnaC04g25860D/BnaC04g25880D/BnaC05g36580D/BnaC07g41900D/BnaC08g25660D/BnaC09g06420D/BnaCnng57010D/BnaUnng03590D	24
GO:0045309	protein phosphorylated amino acid binding	30/12729	83/76374	1.48e-05	6.84e-05	4.13e-05	BnaA02g00540D/BnaA03g02930D/BnaA03g27950D/BnaA05g18320D/BnaA05g33430D/BnaA07g10500D/BnaA07g10560D/BnaA07g20620D/BnaA07g34180D/BnaA08g20850D/BnaAnng02090D/BnaAnng29600D/BnaC02g00320D/BnaC02g24950D/BnaC03g04330D/BnaC03g32980D/BnaC04g02240D/BnaC05g17440D/BnaC05g27930D/BnaC06g20480D/BnaC06g38800D/BnaC07g13790D/BnaC07g13820D/BnaC08g05920D/BnaC08g05950D/BnaC09g46090D/BnaC09g46150D/BnaC09g52760D/BnaCnng…	30
GO:0003988	acetyl-CoA C-acyltransferase activity	12/12729	20/76374	1.52e-05	6.99e-05	4.22e-05	BnaA02g30470D/BnaA03g15290D/BnaA04g19180D/BnaA05g10480D/BnaA08g28040D/BnaC02g18580D/BnaC02g38800D/BnaC03g18470D/BnaC03g47990D/BnaC04g11470D/BnaC04g43560D/BnaC08g00920D	12
GO:0004365	glyceraldehyde-3-phosphate dehydrogenase (NAD+) (phosphorylating) activity	12/12729	20/76374	1.52e-05	6.99e-05	4.22e-05	BnaA01g33660D/BnaA03g28480D/BnaA05g33200D/BnaA06g08510D/BnaA08g24270D/BnaA09g46260D/BnaC01g40210D/BnaC03g33610D/BnaC05g09880D/BnaC05g47450D/BnaC08g15900D/BnaC08g40330D	12
GO:0008276	protein methyltransferase activity	14/12729	26/76374	1.63e-05	7.46e-05	4.5e-05	BnaA03g32190D/BnaA03g35560D/BnaA03g51290D/BnaA05g19120D/BnaA05g26770D/BnaA08g12690D/BnaC01g07310D/BnaC01g14560D/BnaC01g32830D/BnaC03g37480D/BnaC03g41340D/BnaC03g77370D/BnaC05g32500D/BnaC05g40790D	14
GO:0000049	tRNA binding	22/12729	53/76374	1.66e-05	7.57e-05	4.57e-05	BnaA02g16040D/BnaA03g51770D/BnaA03g56470D/BnaA04g06620D/BnaA05g01810D/BnaA05g20880D/BnaA06g23200D/BnaA07g17620D/BnaA07g30300D/BnaA09g37290D/BnaA09g37740D/BnaAnng08940D/BnaC02g21460D/BnaC03g50160D/BnaC04g01490D/BnaC04g29310D/BnaC06g16310D/BnaC06g33750D/BnaC08g08850D/BnaC08g29030D/BnaC08g48970D/BnaC09g41860D	22
GO:0005200	structural constituent of cytoskeleton	42/12729	133/76374	1.7e-05	7.72e-05	4.66e-05	BnaA01g07540D/BnaA01g19850D/BnaA02g00190D/BnaA02g07080D/BnaA02g22660D/BnaA03g09510D/BnaA03g55890D/BnaA04g24300D/BnaA05g26910D/BnaA06g12580D/BnaA06g18020D/BnaA06g20460D/BnaA07g00230D/BnaA07g32090D/BnaA08g22640D/BnaA09g09810D/BnaA09g17090D/BnaA10g12390D/BnaA10g22340D/BnaA10g28430D/BnaAnng09960D/BnaC01g09210D/BnaC02g00690D/BnaC02g10000D/BnaC02g31030D/BnaC03g03940D/BnaC03g12030D/BnaC03g43090D/BnaC03g…	42
GO:0042991	obsolete transcription factor import into nucleus	48/12729	159/76374	1.71e-05	7.77e-05	4.69e-05	BnaA01g26250D/BnaA01g26260D/BnaA01g33870D/BnaA02g04000D/BnaA02g29790D/BnaA03g06930D/BnaA03g32190D/BnaA03g32490D/BnaA03g35110D/BnaA05g01820D/BnaA05g21030D/BnaA05g26350D/BnaA05g26770D/BnaA06g06930D/BnaA06g37550D/BnaA07g01940D/BnaA07g20450D/BnaA07g34690D/BnaA10g22820D/BnaA10g22840D/BnaAnng06030D/BnaC01g33540D/BnaC01g40380D/BnaC02g01070D/BnaC02g07930D/BnaC02g37760D/BnaC02g37840D/BnaC03g08830D/BnaC03g…	48
GO:0045292	mRNA cis splicing, via spliceosome	8/12729	10/76374	1.94e-05	8.77e-05	5.3e-05	BnaA03g38370D/BnaA06g36240D/BnaA09g08310D/BnaC07g17720D/BnaC09g08560D/BnaC09g08570D/BnaC09g08580D/BnaUnng02290D	8
GO:0010183	pollen tube guidance	30/12729	84/76374	1.94e-05	8.77e-05	5.3e-05	BnaA01g09580D/BnaA01g35450D/BnaA01g35290D/BnaA02g06350D/BnaA03g19530D/BnaA03g58380D/BnaA04g26790D/BnaA05g02290D/BnaA06g38830D/BnaA06g38840D/BnaA10g00050D/BnaA10g11040D/BnaA10g13230D/BnaA10g25170D/BnaAnng36230D/BnaC01g11200D/BnaC01g18060D/BnaC01g22370D/BnaC03g23420D/BnaC03g55290D/BnaC03g62830D/BnaC04g01970D/BnaC04g51530D/BnaC04g51580D/BnaC05g00070D/BnaC07g50190D/BnaC09g50110D/BnaC09g53700D/BnaCnng…	30
GO:0019773	proteasome core complex, alpha-subunit complex	17/12729	36/76374	1.99e-05	8.96e-05	5.41e-05	BnaA02g23310D/BnaA03g38250D/BnaA03g41260D/BnaA04g15540D/BnaA07g04410D/BnaA07g12990D/BnaA09g15700D/BnaA09g31830D/BnaC03g45100D/BnaC04g17110D/BnaC04g17530D/BnaC04g38540D/BnaC07g04250D/BnaC07g32150D/BnaC08g22660D/BnaC09g08220D/BnaC09g17140D	17
GO:0006086	acetyl-CoA biosynthetic process from pyruvate	10/12729	15/76374	2.18e-05	9.78e-05	5.91e-05	BnaA02g11520D/BnaA03g13490D/BnaA06g33300D/BnaA09g19620D/BnaA10g05930D/BnaC02g16000D/BnaC03g16370D/BnaC07g23030D/BnaC08g03220D/BnaC09g26770D	10
GO:0040014	regulation of multicellular organism growth	10/12729	15/76374	2.18e-05	9.78e-05	5.91e-05	BnaA01g27710D/BnaA03g34250D/BnaA05g23180D/BnaA06g00360D/BnaC01g35230D/BnaC03g39720D/BnaC03g70470D/BnaC03g70480D/BnaC05g36580D/BnaC06g07270D	10
GO:0009742	brassinosteroid mediated signaling pathway	61/12729	219/76374	2.25e-05	0.000100666	6.08e-05	BnaA01g05490D/BnaA01g08850D/BnaA01g19810D/BnaA02g00540D/BnaA03g02930D/BnaA03g43510D/BnaA05g18320D/BnaA06g18060D/BnaA06g34400D/BnaA06g35930D/BnaA06g37360D/BnaA06g40640D/BnaA07g10500D/BnaA07g10560D/BnaA07g20620D/BnaA07g22200D/BnaA07g31610D/BnaA07g34180D/BnaA08g16520D/BnaA08g16920D/BnaA08g20850D/BnaA09g36530D/BnaA10g12680D/BnaAnng12570D/BnaAnng02090D/BnaAnng29600D/BnaAnng30830D/BnaC01g10520D/BnaC01g…	61
GO:0010043	response to zinc ion	90/12729	356/76374	2.28e-05	0.000101487	6.13e-05	BnaA01g05410D/BnaA01g05950D/BnaA01g32870D/BnaA02g12790D/BnaA02g18300D/BnaA02g18370D/BnaA03g05820D/BnaA03g14140D/BnaA03g14150D/BnaA03g18380D/BnaA03g18390D/BnaA03g26140D/BnaA03g30850D/BnaA03g38250D/BnaA03g51390D/BnaA04g12350D/BnaA04g17910D/BnaA05g28760D/BnaA05g29180D/BnaA05g33440D/BnaA05g33470D/BnaA06g13050D/BnaA06g13100D/BnaA06g15500D/BnaA06g38480D/BnaA07g04410D/BnaA07g10870D/BnaA07g33590D/BnaA08g…	90
GO:0010212	response to ionizing radiation	22/12729	54/76374	2.36e-05	0.000104994	6.34e-05	BnaA01g35820D/BnaA03g27830D/BnaA04g05720D/BnaA05g11420D/BnaA08g17300D/BnaA09g14430D/BnaA09g14440D/BnaA09g26060D/BnaA10g10180D/BnaC01g28350D/BnaC03g32880D/BnaC03g59760D/BnaC04g13660D/BnaC04g18720D/BnaC04g28430D/BnaC05g23450D/BnaC05g23460D/BnaC05g31170D/BnaC08g08280D/BnaC09g15030D/BnaCnng32640D/BnaCnng68160D	22
GO:0008408	3'-5' exonuclease activity	20/12729	47/76374	2.58e-05	0.000114219	6.9e-05	BnaA02g05510D/BnaA03g08430D/BnaA04g18800D/BnaA05g10860D/BnaA05g12760D/BnaA05g15640D/BnaA05g20400D/BnaA06g38950D/BnaA10g14100D/BnaC01g42510D/BnaC02g09390D/BnaC03g10750D/BnaC03g54940D/BnaC04g12380D/BnaC04g43010D/BnaC05g26940D/BnaC05g32360D/BnaC05g37890D/BnaC06g11900D/BnaCnng11710D	20
GO:0048658	anther wall tapetum development	15/12729	30/76374	2.61e-05	0.00011534	6.97e-05	BnaA02g28360D/BnaA02g35490D/BnaA06g25640D/BnaA06g31470D/BnaA09g11280D/BnaA09g11780D/BnaA10g10220D/BnaA10g10250D/BnaA10g10260D/BnaC02g12480D/BnaC02g37370D/BnaC06g18130D/BnaC09g11720D/BnaC09g12530D/BnaCnng32030D	15
GO:0046034	ATP metabolic process	11/12729	18/76374	2.75e-05	0.000121499	7.34e-05	BnaA06g14330D/BnaA07g11570D/BnaA07g11590D/BnaA07g32270D/BnaA08g21880D/BnaC05g24020D/BnaC05g34480D/BnaC06g36660D/BnaC07g15490D/BnaCnng20640D/BnaCnng26740D	11
GO:0010328	auxin influx transmembrane transporter activity	14/12729	27/76374	2.87e-05	0.000125827	7.6e-05	BnaA03g16880D/BnaA03g18520D/BnaA04g21150D/BnaA04g23190D/BnaA04g26870D/BnaA07g07240D/BnaA07g19210D/BnaC03g20400D/BnaC03g22010D/BnaC04g00490D/BnaC04g16500D/BnaC04g46200D/BnaC04g51510D/BnaC06g18370D	14
GO:0043433	negative regulation of DNA-binding transcription factor activity	14/12729	27/76374	2.87e-05	0.000125827	7.6e-05	BnaA03g16620D/BnaA09g33180D/BnaA10g00780D/BnaAnng17890D/BnaAnng07500D/BnaC03g00040D/BnaC05g00840D/BnaC06g14080D/BnaC07g02670D/BnaC07g02690D/BnaC08g23970D/BnaCnng45140D/BnaCnng45150D/BnaCnng45160D	14
GO:0010305	leaf vascular tissue pattern formation	39/12729	123/76374	3e-05	0.000131508	7.94e-05	BnaA03g16620D/BnaA03g39420D/BnaA04g07110D/BnaA05g24850D/BnaA05g36400D/BnaA06g03420D/BnaA06g03440D/BnaA06g05600D/BnaA06g18830D/BnaA06g34400D/BnaA07g03260D/BnaA07g08860D/BnaA08g02930D/BnaA08g26200D/BnaA09g08910D/BnaA09g27990D/BnaA09g33180D/BnaA10g17690D/BnaAnng07500D/BnaC03g46820D/BnaC03g54740D/BnaC04g05890D/BnaC05g07140D/BnaC05g21250D/BnaC05g32400D/BnaC05g38880D/BnaC06g14080D/BnaC06g40890D/BnaC07g…	39
GO:0050897	cobalt ion binding	61/12729	222/76374	3.5e-05	0.000153059	9.25e-05	BnaA01g29060D/BnaA01g30570D/BnaA01g33880D/BnaA03g02040D/BnaA03g25920D/BnaA03g33670D/BnaA03g39570D/BnaA03g50840D/BnaA05g24530D/BnaA05g26650D/BnaA05g26660D/BnaA05g37230D/BnaA07g09080D/BnaA07g23560D/BnaA07g28560D/BnaA07g29260D/BnaA08g11650D/BnaA08g27280D/BnaA09g01140D/BnaA09g29700D/BnaA09g45500D/BnaA09g50980D/BnaA10g01510D/BnaA10g16660D/BnaA10g23130D/BnaA10g23880D/BnaAnng13720D/BnaC01g27720D/BnaC01g…	61
GO:0006260	DNA replication	52/12729	181/76374	3.55e-05	0.000154531	9.33e-05	BnaA01g00430D/BnaA01g01430D/BnaA01g04290D/BnaA01g26670D/BnaA03g32300D/BnaA03g39050D/BnaA04g03980D/BnaA04g04010D/BnaA05g21580D/BnaA06g05740D/BnaA06g25730D/BnaA07g08730D/BnaA07g25980D/BnaA07g28960D/BnaA08g12070D/BnaA09g08880D/BnaA09g09200D/BnaA09g48710D/BnaA10g01340D/BnaA10g05230D/BnaAnng04270D/BnaAnng23850D/BnaC01g01420D/BnaC01g02430D/BnaC01g05720D/BnaC01g08290D/BnaC01g34060D/BnaC03g37660D/BnaC03g…	52
GO:0006471	protein ADP-ribosylation	9/12729	13/76374	3.7e-05	0.000159756	9.65e-05	BnaA02g36520D/BnaA03g26210D/BnaA05g11420D/BnaA10g13870D/BnaAnng41190D/BnaC02g27380D/BnaC03g30970D/BnaC04g13660D/BnaC09g36510D	9
GO:0016116	carotenoid metabolic process	9/12729	13/76374	3.7e-05	0.000159756	9.65e-05	BnaA01g05410D/BnaA05g28760D/BnaA07g33460D/BnaA08g16610D/BnaC01g00280D/BnaC02g23610D/BnaC03g60490D/BnaC05g43230D/BnaC06g38010D	9
GO:0031062	positive regulation of histone methylation	9/12729	13/76374	3.7e-05	0.000159756	9.65e-05	BnaA01g05410D/BnaA05g28760D/BnaA07g33460D/BnaA08g16610D/BnaC01g00280D/BnaC02g23610D/BnaC03g60490D/BnaC05g43230D/BnaC06g38010D	9
GO:0046975	histone methyltransferase activity (H3-K36 specific)	9/12729	13/76374	3.7e-05	0.000159756	9.65e-05	BnaA01g05410D/BnaA05g28760D/BnaA07g33460D/BnaA08g16610D/BnaC01g00280D/BnaC02g23610D/BnaC03g60490D/BnaC05g43230D/BnaC06g38010D	9
GO:0010072	primary shoot apical meristem specification	65/12729	241/76374	3.72e-05	0.000160184	9.68e-05	BnaA01g12740D/BnaA01g27690D/BnaA02g01670D/BnaA02g01720D/BnaA03g04360D/BnaA03g26120D/BnaA03g42250D/BnaA03g45660D/BnaA04g25980D/BnaA05g04460D/BnaA06g00360D/BnaA06g10370D/BnaA06g15750D/BnaA06g21130D/BnaA07g08390D/BnaA07g14790D/BnaA08g11670D/BnaA08g18290D/BnaA09g00890D/BnaA09g27240D/BnaA09g36280D/BnaA09g51080D/BnaA09g56690D/BnaA10g01560D/BnaA10g19790D/BnaC01g14470D/BnaC01g22210D/BnaC01g35220D/BnaC02g…	65
GO:0071944	cell periphery	10/12729	16/76374	4.95e-05	0.00021252	0.000128377	BnaA03g57740D/BnaC02g24450D/BnaC02g31430D/BnaC03g44570D/BnaC03g44640D/BnaC03g44650D/BnaC07g09710D/BnaC08g13090D/BnaCnng00290D/BnaCnng00310D	10
GO:0010087	phloem or xylem histogenesis	31/12729	92/76374	5.23e-05	0.000223838	0.000135213	BnaA03g26120D/BnaA03g39630D/BnaA05g24850D/BnaA07g14790D/BnaA08g11670D/BnaA08g17280D/BnaA08g28320D/BnaA09g00890D/BnaA09g05440D/BnaA09g50250D/BnaA09g51080D/BnaA10g01560D/BnaA10g03830D/BnaA10g17690D/BnaC02g27020D/BnaC03g30850D/BnaC03g59780D/BnaC03g77150D/BnaC04g28800D/BnaC05g01600D/BnaC05g03750D/BnaC05g38880D/BnaC06g12710D/BnaC08g01360D/BnaC08g44370D/BnaC09g00020D/BnaC09g05010D/BnaC09g41060D/BnaCnng…	31
GO:0016045	detection of bacterium	36/12729	113/76374	5.32e-05	0.000227223	0.000137258	BnaA01g18990D/BnaA01g34150D/BnaA01g34210D/BnaA02g24450D/BnaA03g28320D/BnaA05g32840D/BnaA06g03560D/BnaA06g12690D/BnaA06g12700D/BnaA06g17550D/BnaA07g20110D/BnaA07g31220D/BnaA07g35260D/BnaA08g22580D/BnaA09g17950D/BnaA09g44500D/BnaA10g14990D/BnaAnng23990D/BnaC02g26030D/BnaC02g32260D/BnaC03g10100D/BnaC03g33480D/BnaC03g52630D/BnaC03g56440D/BnaC03g58110D/BnaC04g37140D/BnaC05g14250D/BnaC05g48140D/BnaC06g…	36
GO:0080090	regulation of primary metabolic process	13/12729	25/76374	5.34e-05	0.000227604	0.000137488	BnaA01g10070D/BnaA01g30640D/BnaA03g23420D/BnaA05g09460D/BnaA05g10630D/BnaA08g09300D/BnaA09g50470D/BnaAnng12430D/BnaC01g11890D/BnaC01g38310D/BnaC02g09350D/BnaC04g39680D/BnaCnng68410D	13
GO:0010431	seed maturation	39/12729	126/76374	5.47e-05	0.000232723	0.00014058	BnaA01g10280D/BnaA01g24280D/BnaA03g36910D/BnaA04g18070D/BnaA05g06270D/BnaA05g06280D/BnaA05g16620D/BnaA06g00360D/BnaA07g35820D/BnaA07g38260D/BnaA09g00710D/BnaA10g01570D/BnaA10g06350D/BnaC01g13960D/BnaC01g25090D/BnaC01g31270D/BnaC01g41280D/BnaC02g27020D/BnaC02g45840D/BnaC02g44850D/BnaC03g43100D/BnaC03g70470D/BnaC03g70480D/BnaC04g05300D/BnaC04g06500D/BnaC04g06510D/BnaC04g06520D/BnaC06g07270D/BnaC08g…	39
GO:0004781	sulfate adenylyltransferase (ATP) activity	11/12729	19/76374	5.55e-05	0.000234348	0.000141562	BnaA02g06400D/BnaA03g01690D/BnaA03g36860D/BnaA05g16830D/BnaA06g36560D/BnaA10g24820D/BnaC02g30510D/BnaC03g02240D/BnaC07g17320D/BnaC09g49740D/BnaCnng62800D	11
GO:0009800	cinnamic acid biosynthetic process	11/12729	19/76374	5.55e-05	0.000234348	0.000141562	BnaA04g04830D/BnaA07g10350D/BnaA07g16060D/BnaA09g30490D/BnaA09g33560D/BnaC05g17910D/BnaC06g14510D/BnaC07g13600D/BnaC08g06060D/BnaC08g24360D/BnaCnng52250D	11
GO:0010434	bract formation	11/12729	19/76374	5.55e-05	0.000234348	0.000141562	BnaA04g03040D/BnaA04g23860D/BnaA05g02160D/BnaA07g17180D/BnaA09g36500D/BnaC02g38200D/BnaC04g01830D/BnaC04g24530D/BnaC04g47620D/BnaC08g28070D/BnaCnng07590D	11
GO:0048366	leaf development	84/12729	335/76374	5.66e-05	0.000238521	0.000144083	BnaA01g05490D/BnaA01g10100D/BnaA01g23620D/BnaA02g00540D/BnaA02g23750D/BnaA02g34480D/BnaA03g02930D/BnaA03g05930D/BnaA03g09570D/BnaA03g27950D/BnaA04g07110D/BnaA05g24850D/BnaA05g33430D/BnaA05g36400D/BnaA06g03420D/BnaA06g03440D/BnaA06g10340D/BnaA06g13320D/BnaA06g16550D/BnaA06g23890D/BnaA06g40640D/BnaA06g38620D/BnaA07g25370D/BnaA07g35600D/BnaA08g02930D/BnaA08g09280D/BnaA08g09300D/BnaA08g16520D/BnaA08g…	84
GO:0030527	structural constituent of chromatin	16/12729	35/76374	5.73e-05	0.000240655	0.000145372	BnaA01g06210D/BnaA03g51130D/BnaA05g36070D/BnaA06g13730D/BnaA06g14580D/BnaA07g11300D/BnaA08g12830D/BnaA08g21690D/BnaA09g24870D/BnaC01g07490D/BnaC03g67840D/BnaC05g15150D/BnaC07g15210D/BnaC08g19430D/BnaCnng41360D/BnaCnng49050D	16
GO:0051726	regulation of cell cycle	66/12729	249/76374	5.81e-05	0.00024343	0.000147048	BnaA01g10070D/BnaA01g19000D/BnaA01g21040D/BnaA01g22300D/BnaA02g28570D/BnaA03g02430D/BnaA03g10210D/BnaA03g18810D/BnaA03g21030D/BnaA04g15560D/BnaA05g04580D/BnaA05g04600D/BnaA05g12470D/BnaA05g27370D/BnaA06g16070D/BnaA06g20950D/BnaA06g25390D/BnaA06g32440D/BnaA07g02080D/BnaA07g06360D/BnaA07g10580D/BnaA07g13010D/BnaA08g09300D/BnaA09g16580D/BnaA09g30730D/BnaA09g49520D/BnaA10g11520D/BnaAnng38300D/BnaAnng…	66
GO:0003730	mRNA 3'-UTR binding	8/12729	11/76374	6.07e-05	0.000251958	0.0001522	BnaA04g17020D/BnaA06g01340D/BnaA08g00930D/BnaAnng18890D/BnaC03g78250D/BnaC04g40330D/BnaC06g06870D/BnaC08g37790D	8
GO:0004839	ubiquitin activating enzyme activity	8/12729	11/76374	6.07e-05	0.000251958	0.0001522	BnaA03g13720D/BnaA04g17280D/BnaA05g12250D/BnaA10g30270D/BnaC03g16630D/BnaC04g14640D/BnaC04g40890D/BnaC09g49100D	8
GO:0009432	SOS response	8/12729	11/76374	6.07e-05	0.000251958	0.0001522	BnaA07g20500D/BnaA07g35950D/BnaA09g44130D/BnaAnng27110D/BnaC02g25430D/BnaC06g20150D/BnaC07g01720D/BnaC08g36690D	8
GO:0032509	endosome transport via multivesicular body sorting pathway	8/12729	11/76374	6.07e-05	0.000251958	0.0001522	BnaA02g16240D/BnaA07g22870D/BnaA07g30560D/BnaC02g21740D/BnaC02g37130D/BnaC06g23830D/BnaC06g43840D/BnaC08g01190D	8
GO:0006415	translational termination	17/12729	39/76374	7.13e-05	0.000295109	0.000178266	BnaA06g07770D/BnaA06g12300D/BnaA06g30550D/BnaA08g22800D/BnaA08g24510D/BnaA09g44720D/BnaAnng14180D/BnaAnng07970D/BnaC02g38280D/BnaC03g20980D/BnaC03g57000D/BnaC05g09190D/BnaC05g13930D/BnaC07g26240D/BnaC08g17710D/BnaC08g37420D/BnaC09g01130D	17
GO:0042753	positive regulation of circadian rhythm	14/12729	29/76374	7.94e-05	0.000328186	0.000198247	BnaA02g00920D/BnaA03g18840D/BnaA04g22640D/BnaA05g05560D/BnaA09g38340D/BnaA10g21200D/BnaC03g72320D/BnaC04g05290D/BnaC04g05320D/BnaC04g56730D/BnaC06g42820D/BnaC08g30500D/BnaC09g45380D/BnaCnng20200D	14
GO:0090506	axillary shoot meristem initiation	9/12729	14/76374	8.83e-05	0.00036381	0.000219765	BnaA01g14960D/BnaA03g37580D/BnaA04g11190D/BnaA07g05270D/BnaA07g15380D/BnaC03g44760D/BnaC06g13490D/BnaCnng55420D/BnaCnng11230D	9
GO:0090332	stomatal closure	23/12729	62/76374	8.95e-05	0.000368182	0.000222407	BnaA03g39320D/BnaA03g39360D/BnaA03g59360D/BnaA06g03820D/BnaA09g05850D/BnaA09g05860D/BnaA09g29090D/BnaA10g27060D/BnaA10g27070D/BnaA10g27080D/BnaAnng12060D/BnaAnng12070D/BnaC01g27600D/BnaC03g46680D/BnaC03g46690D/BnaC04g18270D/BnaC04g18290D/BnaC04g42010D/BnaC04g42020D/BnaC05g20170D/BnaC06g01970D/BnaCnng03460D/BnaCnng03470D	23
GO:0006367	transcription initiation from RNA polymerase II promoter	19/12729	47/76374	9.48e-05	0.000389014	0.000234991	BnaA02g17270D/BnaA03g25250D/BnaA03g41700D/BnaA03g55460D/BnaA05g13730D/BnaA05g13850D/BnaA06g00420D/BnaA07g21660D/BnaA08g00420D/BnaA09g32740D/BnaAnng35590D/BnaC02g24370D/BnaC03g02670D/BnaC03g29680D/BnaC03g70590D/BnaC06g07180D/BnaC06g10970D/BnaC08g23580D/BnaCnng67730D	19
GO:0008361	regulation of cell size	66/12729	253/76374	9.71e-05	0.000397635	0.000240198	BnaA01g12560D/BnaA02g02080D/BnaA02g29470D/BnaA02g30490D/BnaA03g08040D/BnaA03g16880D/BnaA03g18520D/BnaA03g24910D/BnaA03g40550D/BnaA03g54310D/BnaA04g21150D/BnaA04g23190D/BnaA05g30530D/BnaA06g03850D/BnaA06g24650D/BnaA06g31250D/BnaA07g07240D/BnaA07g08390D/BnaA07g34200D/BnaA07g37150D/BnaA08g03320D/BnaA08g09070D/BnaA08g18290D/BnaA08g19440D/BnaA08g28010D/BnaA09g02390D/BnaA09g03190D/BnaA09g21270D/BnaA09g…	66
GO:0051607	defense response to virus	51/12729	183/76374	9.88e-05	0.000403542	0.000243766	BnaA02g08440D/BnaA02g34970D/BnaA03g03540D/BnaA04g26420D/BnaA05g05110D/BnaA05g17060D/BnaA06g03460D/BnaA06g05600D/BnaA06g09990D/BnaA06g27060D/BnaA06g35530D/BnaA07g36800D/BnaA08g02940D/BnaA08g02950D/BnaA08g08360D/BnaA08g26200D/BnaA09g04810D/BnaA09g28170D/BnaA10g20820D/BnaA10g26220D/BnaA10g28960D/BnaAnng07090D/BnaAnng00870D/BnaC01g02510D/BnaC02g02820D/BnaC02g02830D/BnaC02g11980D/BnaC02g11990D/BnaC02g…	51
GO:0009649	entrainment of circadian clock	12/12729	23/76374	9.97e-05	0.000406373	0.000245476	BnaA03g18840D/BnaA04g19110D/BnaA04g22640D/BnaA05g05560D/BnaA05g34990D/BnaC03g18300D/BnaC03g72320D/BnaC04g05290D/BnaC04g05320D/BnaC04g11750D/BnaC04g43440D/BnaC04g56730D	12
GO:0035279	mRNA cleavage involved in gene silencing by miRNA	10/12729	17/76374	0.000102199	0.000415404	0.000250932	BnaA03g08110D/BnaA06g05600D/BnaA08g26200D/BnaA10g00800D/BnaA10g14710D/BnaC03g10290D/BnaC05g00860D/BnaC05g07140D/BnaC08g13800D/BnaC09g37040D	10
GO:0004826	phenylalanine-tRNA ligase activity	11/12729	20/76374	0.000104755	0.000423835	0.000256025	BnaA03g51770D/BnaA03g56470D/BnaA05g20880D/BnaA07g17620D/BnaA09g37290D/BnaA10g18320D/BnaC02g06350D/BnaC06g16310D/BnaC08g29030D/BnaC09g41850D/BnaC09g41860D	11
GO:0006432	phenylalanyl-tRNA aminoacylation	11/12729	20/76374	0.000104755	0.000423835	0.000256025	BnaA03g51770D/BnaA03g56470D/BnaA05g20880D/BnaA07g17620D/BnaA09g37290D/BnaA10g18320D/BnaC02g06350D/BnaC06g16310D/BnaC08g29030D/BnaC09g41850D/BnaC09g41860D	11
GO:0005654	nucleoplasm	21/12729	55/76374	0.000110691	0.000446825	0.000269913	BnaA01g04230D/BnaA01g34740D/BnaA02g00930D/BnaA02g12180D/BnaA07g02510D/BnaA07g16030D/BnaA09g08990D/BnaA09g33490D/BnaA10g21330D/BnaAnng34180D/BnaAnng37780D/BnaC01g05670D/BnaC03g65580D/BnaC05g21600D/BnaC06g14490D/BnaC08g24320D/BnaC09g09250D/BnaC09g45330D/BnaCnng22750D/BnaCnng14500D/BnaCnng19720D	21
GO:0051302	regulation of cell division	49/12729	175/76374	0.000117805	0.000474455	0.000286603	BnaA01g12560D/BnaA01g15170D/BnaA03g02950D/BnaA03g04530D/BnaA03g24910D/BnaA03g47710D/BnaA05g06130D/BnaA05g23390D/BnaA05g28420D/BnaA06g21880D/BnaA07g00690D/BnaA07g00700D/BnaA09g06080D/BnaA09g21270D/BnaA09g40540D/BnaA10g21170D/BnaA10g21780D/BnaAnng38280D/BnaAnng17310D/BnaAnng24490D/BnaC01g14350D/BnaC01g41560D/BnaC02g00100D/BnaC02g14770D/BnaC03g04350D/BnaC03g06070D/BnaC03g12350D/BnaC03g54900D/BnaC03g…	49
GO:0009987	cellular process	45/12729	157/76374	0.000121125	0.000486714	0.000294008	BnaA01g07350D/BnaA01g21360D/BnaA01g25220D/BnaA01g25470D/BnaA02g13990D/BnaA02g17790D/BnaA02g22430D/BnaA03g06180D/BnaA03g12630D/BnaA03g36000D/BnaA04g01450D/BnaA07g12970D/BnaA07g18610D/BnaA08g02700D/BnaA08g27560D/BnaA09g29100D/BnaA09g38240D/BnaA09g43760D/BnaA09g49510D/BnaA10g07970D/BnaA10g18210D/BnaAnng20510D/BnaAnng33430D/BnaC01g09020D/BnaC02g32830D/BnaC03g46700D/BnaC03g56430D/BnaC03g75260D/BnaC04g…	45
GO:0010199	organ boundary specification between lateral organs and the meristem	14/12729	30/76374	0.00012612	0.00050563	0.000305435	BnaA02g18100D/BnaA03g18330D/BnaA07g24240D/BnaA07g28100D/BnaA07g32710D/BnaA08g19860D/BnaA09g29250D/BnaC02g24050D/BnaC03g21850D/BnaC05g51000D/BnaC06g30790D/BnaC06g37170D/BnaC06g43380D/BnaCnng12230D	14
GO:0010438	cellular response to sulfur starvation	16/12729	37/76374	0.000129927	0.000519709	0.000313939	BnaA03g02170D/BnaA03g39790D/BnaA03g40190D/BnaA09g05480D/BnaA10g23980D/BnaAnng06630D/BnaAnng06640D/BnaC02g41860D/BnaC03g03210D/BnaC09g05060D/BnaC09g05290D/BnaC09g05300D/BnaCnng21270D/BnaCnng43220D/BnaCnng49840D/BnaCnng65380D	16
GO:0016485	protein processing	20/12729	52/76374	0.000142327	0.000568018	0.000343121	BnaA02g17790D/BnaA03g14440D/BnaA04g01450D/BnaA04g28110D/BnaA07g18610D/BnaA09g38240D/BnaA09g55830D/BnaAnng37220D/BnaC01g19200D/BnaC02g26390D/BnaC03g17490D/BnaC04g22540D/BnaC04g37500D/BnaC04g56310D/BnaC06g17640D/BnaC08g30210D/BnaC08g33540D/BnaCnng69030D/BnaCnng25270D/BnaCnng31070D	20
GO:0006913	nucleocytoplasmic transport	36/12729	118/76374	0.000143393	0.000570975	0.000344907	BnaA03g29930D/BnaA03g31920D/BnaA03g39880D/BnaA03g57860D/BnaA03g57870D/BnaA05g29380D/BnaA06g08750D/BnaA06g30070D/BnaA06g36440D/BnaA06g39850D/BnaA07g04790D/BnaA07g05030D/BnaA09g05550D/BnaA09g16820D/BnaA10g21110D/BnaAnng06690D/BnaAnng09510D/BnaC02g41910D/BnaC03g35150D/BnaC03g44490D/BnaC03g44500D/BnaC03g44910D/BnaC03g73390D/BnaC05g10060D/BnaC06g06690D/BnaC07g00430D/BnaC07g17480D/BnaC07g22440D/BnaC07g…	36
GO:0009686	gibberellin biosynthetic process	60/12729	228/76374	0.000151073	0.0006002	0.000362561	BnaA02g00540D/BnaA02g13730D/BnaA02g19810D/BnaA02g19820D/BnaA02g37010D/BnaA02g35530D/BnaA03g37510D/BnaA04g18810D/BnaA05g08020D/BnaA05g10900D/BnaA05g27620D/BnaA05g32630D/BnaA05g32640D/BnaA06g10250D/BnaA06g21290D/BnaA06g21690D/BnaA06g27960D/BnaA07g25800D/BnaA07g26980D/BnaA07g35700D/BnaA07g35710D/BnaA09g28260D/BnaA09g57140D/BnaA10g17240D/BnaA10g23620D/BnaAnng40310D/BnaAnng41910D/BnaAnng07020D/BnaAnng…	60
GO:0006325	chromatin organization	22/12729	60/76374	0.00015409	0.000609436	0.00036814	BnaA01g19000D/BnaA01g21040D/BnaA03g06690D/BnaA06g07950D/BnaA06g16810D/BnaA06g20800D/BnaA09g15880D/BnaAnng38300D/BnaAnng03880D/BnaAnng27490D/BnaC01g42660D/BnaC03g08560D/BnaC03g53260D/BnaC03g53270D/BnaC06g07750D/BnaC08g18030D/BnaC08g48660D/BnaC09g11140D/BnaC09g16680D/BnaCnng69240D/BnaCnng55140D/BnaCnng09290D	22
GO:0008356	asymmetric cell division	22/12729	60/76374	0.00015409	0.000609436	0.00036814	BnaA01g20470D/BnaA03g17330D/BnaA05g06890D/BnaA07g38270D/BnaA08g09070D/BnaA09g35820D/BnaA09g40540D/BnaC01g25750D/BnaC02g00100D/BnaC03g20830D/BnaC03g52880D/BnaC04g07760D/BnaC05g11060D/BnaC06g43050D/BnaC08g20460D/BnaC08g20470D/BnaC08g27320D/BnaC08g32980D/BnaC08g33020D/BnaC09g45630D/BnaCnng49920D/BnaCnng55310D	22
GO:0048283	indeterminate inflorescence morphogenesis	8/12729	12/76374	0.000155314	0.000611526	0.000369402	BnaA03g01690D/BnaA05g33630D/BnaA10g24820D/BnaAnng16780D/BnaC03g02240D/BnaC05g47690D/BnaC05g48370D/BnaC09g49740D	8
GO:0070063	RNA polymerase binding	8/12729	12/76374	0.000155314	0.000611526	0.000369402	BnaA05g19330D/BnaA05g36840D/BnaA10g28290D/BnaA10g28300D/BnaC05g32820D/BnaC05g33110D/BnaC06g01000D/BnaC06g01010D	8
GO:0000785	chromatin	24/12729	68/76374	0.000157025	0.000616882	0.000372638	BnaA01g06210D/BnaA01g17510D/BnaA01g35360D/BnaA03g51130D/BnaA05g03310D/BnaA05g36070D/BnaA06g13730D/BnaA06g14580D/BnaA07g11300D/BnaA08g12830D/BnaA08g21690D/BnaA09g24870D/BnaA09g37880D/BnaC01g07490D/BnaC01g21860D/BnaC03g08560D/BnaC03g67840D/BnaC04g02920D/BnaC05g15150D/BnaC07g15210D/BnaC08g19430D/BnaC08g29740D/BnaCnng41360D/BnaCnng49050D	24
GO:0010587	miRNA catabolic process	12/12729	24/76374	0.000169229	0.000663347	0.000400706	BnaA02g17350D/BnaA06g37110D/BnaA09g15880D/BnaAnng09050D/BnaC02g23590D/BnaC02g25530D/BnaC06g36330D/BnaC08g03500D/BnaC08g18030D/BnaC09g09280D/BnaC09g16680D/BnaCnng37390D	12
GO:0009435	NAD biosynthetic process	11/12729	21/76374	0.000186815	0.000730654	0.000441364	BnaA02g26970D/BnaA03g11210D/BnaA03g53820D/BnaA06g34980D/BnaA09g42000D/BnaA10g09920D/BnaC02g33940D/BnaC03g14040D/BnaC07g51220D/BnaC09g32370D/BnaCnng42860D	11
GO:0004476	mannose-6-phosphate isomerase activity	9/12729	15/76374	0.000187891	0.000731612	0.000441943	BnaA01g32870D/BnaA02g12790D/BnaA05g33470D/BnaA09g40630D/BnaAnng24620D/BnaC01g41980D/BnaC02g17130D/BnaC05g48220D/BnaC08g03320D	9
GO:0051693	actin filament capping	9/12729	15/76374	0.000187891	0.000731612	0.000441943	BnaA06g14330D/BnaA07g11570D/BnaA07g11590D/BnaA07g32270D/BnaA08g21880D/BnaC06g36660D/BnaC07g15490D/BnaCnng20640D/BnaCnng26740D	9
GO:0032875	regulation of DNA endoreduplication	20/12729	53/76374	0.000192981	0.000749771	0.000452912	BnaA03g03390D/BnaA03g04530D/BnaA05g06130D/BnaA05g23390D/BnaA07g00690D/BnaA07g00700D/BnaA10g20990D/BnaAnng38280D/BnaC02g14770D/BnaC03g04820D/BnaC03g06070D/BnaC03g54900D/BnaC04g06340D/BnaC05g17850D/BnaC05g37040D/BnaC06g11800D/BnaC07g00040D/BnaC09g45060D/BnaCnng25420D/BnaCnng71150D	20
GO:0010427	abscisic acid binding	14/12729	31/76374	0.000194783	0.000755107	0.000456135	BnaA01g17510D/BnaA01g35360D/BnaA03g26790D/BnaA06g40360D/BnaA07g38130D/BnaA10g00540D/BnaAnng26820D/BnaC01g21860D/BnaC03g31730D/BnaC05g00620D/BnaC05g17260D/BnaC06g17940D/BnaC07g19450D/BnaC09g19620D	14
GO:0048826	cotyledon morphogenesis	10/12729	18/76374	0.000195517	0.000756286	0.000456847	BnaA02g14550D/BnaA03g37250D/BnaA07g05840D/BnaA07g05860D/BnaA07g24100D/BnaA07g28310D/BnaC03g43540D/BnaC06g25160D/BnaC06g30800D/BnaCnng70120D	10
GO:0009561	megagametogenesis	23/12729	65/76374	0.000204295	0.000788508	0.000476312	BnaA01g02930D/BnaA01g04230D/BnaA01g18930D/BnaA01g34740D/BnaA03g50990D/BnaA07g02560D/BnaA08g11320D/BnaA09g24750D/BnaA09g56360D/BnaA10g01850D/BnaA10g21330D/BnaAnng34180D/BnaC01g04190D/BnaC01g05670D/BnaC01g22760D/BnaC03g65580D/BnaC03g77030D/BnaC03g77040D/BnaC05g01900D/BnaC05g12370D/BnaC08g16910D/BnaC08g38420D/BnaC08g46410D	23
GO:0000373	Group II intron splicing	13/12729	28/76374	0.000234076	0.000899507	0.000543363	BnaA01g19260D/BnaA02g03010D/BnaA05g16660D/BnaA05g33910D/BnaAnng34720D/BnaC01g23210D/BnaC01g24030D/BnaC01g31630D/BnaC01g31640D/BnaC02g06430D/BnaC03g54650D/BnaC05g29290D/BnaC05g48770D	13
GO:0008097	5S rRNA binding	13/12729	28/76374	0.000234076	0.000899507	0.000543363	BnaA02g15740D/BnaA03g57860D/BnaA03g57870D/BnaA06g30290D/BnaA07g04790D/BnaA07g23270D/BnaC02g21000D/BnaC03g44490D/BnaC03g44500D/BnaC07g26420D/BnaC07g47930D/BnaCnng75030D/BnaCnng07660D	13
GO:0007276	gamete generation	22/12729	62/76374	0.000265917	0.00101139	0.000610949	BnaA01g12560D/BnaA03g04530D/BnaA03g24910D/BnaA04g05720D/BnaA05g06130D/BnaA05g23390D/BnaA09g21270D/BnaAnng38280D/BnaC01g14350D/BnaC02g14770D/BnaC03g06070D/BnaC03g54900D/BnaC03g72960D/BnaC04g06340D/BnaC04g28430D/BnaC05g37040D/BnaC06g11800D/BnaC06g15530D/BnaC07g37700D/BnaC09g23630D/BnaCnng25420D/BnaCnng71150D	22
GO:0004312	fatty acid synthase activity	7/12729	10/76374	0.000267215	0.00101139	0.000610949	BnaA02g24400D/BnaA06g36060D/BnaA09g17930D/BnaC02g32230D/BnaC07g19000D/BnaC08g10730D/BnaC09g19280D	7
GO:0005689	U12-type spliceosomal complex	7/12729	10/76374	0.000267215	0.00101139	0.000610949	BnaA03g13610D/BnaA04g17180D/BnaA10g04620D/BnaC02g30690D/BnaC03g71910D/BnaC04g40780D/BnaC05g04970D	7
GO:0035195	gene silencing by miRNA	7/12729	10/76374	0.000267215	0.00101139	0.000610949	BnaA04g16310D/BnaA06g05150D/BnaA09g48720D/BnaC03g51730D/BnaC04g39580D/BnaC05g06430D/BnaC08g42970D	7
GO:0046653	tetrahydrofolate metabolic process	7/12729	10/76374	0.000267215	0.00101139	0.000610949	BnaA01g35320D/BnaA04g14510D/BnaA06g40040D/BnaC01g41710D/BnaC04g36290D/BnaC07g20200D/BnaCnng40800D	7
GO:0071484	cellular response to light intensity	7/12729	10/76374	0.000267215	0.00101139	0.000610949	BnaA04g16310D/BnaA06g05150D/BnaA09g48720D/BnaC03g51730D/BnaC04g39580D/BnaC05g06430D/BnaC08g42970D	7
GO:0071668	plant-type cell wall assembly	7/12729	10/76374	0.000267215	0.00101139	0.000610949	BnaA04g22570D/BnaA08g17480D/BnaA09g26340D/BnaA09g26350D/BnaC07g09120D/BnaCnng34540D/BnaCnng17800D	7
GO:0000311	plastid large ribosomal subunit	16/12729	39/76374	0.000272298	0.00102842	0.000621236	BnaA01g34110D/BnaA06g19340D/BnaA06g33230D/BnaA07g00970D/BnaA09g19640D/BnaA10g04770D/BnaAnng03500D/BnaC01g24010D/BnaC03g31140D/BnaC03g45400D/BnaC05g05110D/BnaC07g23130D/BnaC08g31780D/BnaC08g31790D/BnaC09g52400D/BnaCnng47210D	16
GO:0043248	proteasome assembly	52/12729	195/76374	0.000282012	0.00106283	0.00064202	BnaA01g12560D/BnaA01g26020D/BnaA02g23370D/BnaA03g04530D/BnaA03g04990D/BnaA03g05700D/BnaA03g24910D/BnaA04g06850D/BnaA04g26870D/BnaA05g06130D/BnaA05g23390D/BnaA06g23130D/BnaA06g36950D/BnaA07g00690D/BnaA07g00700D/BnaA08g29630D/BnaA09g19650D/BnaA09g21270D/BnaA10g21170D/BnaA10g29350D/BnaAnng38280D/BnaAnng40870D/BnaAnng18580D/BnaC01g07880D/BnaC01g14350D/BnaC01g33260D/BnaC02g14770D/BnaC02g30020D/BnaC02g…	52
GO:0006312	mitotic recombination	56/12729	214/76374	0.000285785	0.00107475	0.000649219	BnaA01g12740D/BnaA02g06560D/BnaA02g29040D/BnaA03g01920D/BnaA03g45660D/BnaA04g12200D/BnaA04g23970D/BnaA05g01820D/BnaA05g02230D/BnaA06g06930D/BnaA06g12580D/BnaA06g18830D/BnaA06g35900D/BnaA07g00690D/BnaA07g00700D/BnaA08g17300D/BnaA08g22640D/BnaA09g15510D/BnaA09g20790D/BnaA09g26060D/BnaA09g33950D/BnaA09g46560D/BnaA10g29850D/BnaAnng01630D/BnaC01g14470D/BnaC02g02070D/BnaC02g32770D/BnaC02g37070D/BnaC03g…	56
GO:0016569	covalent chromatin modification	18/12729	47/76374	0.000321268	0.00120561	0.00072827	BnaA03g08110D/BnaA03g35810D/BnaA04g15690D/BnaA05g20380D/BnaA06g19710D/BnaA06g26440D/BnaA07g13090D/BnaA10g00800D/BnaA10g14710D/BnaC01g15410D/BnaC03g10290D/BnaC03g41640D/BnaC03g54010D/BnaC04g17010D/BnaC04g38970D/BnaC05g00860D/BnaC07g30520D/BnaC09g37040D	18
GO:0006605	protein targeting	15/12729	36/76374	0.000343754	0.0012848	0.000776106	BnaA02g00780D/BnaA02g17330D/BnaA03g03180D/BnaA03g26540D/BnaA07g21610D/BnaAnng26750D/BnaC01g00910D/BnaC02g23680D/BnaC03g04590D/BnaC03g31400D/BnaC05g16960D/BnaC06g22280D/BnaC08g19900D/BnaCnng58100D/BnaCnng63830D	15
GO:0015884	folic acid transport	8/12729	13/76374	0.000344561	0.0012848	0.000776106	BnaA05g17490D/BnaA05g35270D/BnaA06g03880D/BnaA09g40060D/BnaC04g12670D/BnaC05g25600D/BnaC06g01910D/BnaC08g32420D	8
GO:0040008	regulation of growth	8/12729	13/76374	0.000344561	0.0012848	0.000776106	BnaA02g06350D/BnaA02g12070D/BnaA06g38830D/BnaA06g38840D/BnaA10g13230D/BnaC02g45200D/BnaC03g55290D/BnaCnng38760D	8
GO:0016482	cytosolic transport	9/12729	16/76374	0.000365813	0.00135829	0.0008205	BnaA01g06850D/BnaA07g24350D/BnaA08g13190D/BnaAnng10840D/BnaC01g08210D/BnaC03g68060D/BnaC06g12200D/BnaC07g50870D/BnaCnng29560D	9
GO:0044446	obsolete intracellular organelle part	9/12729	16/76374	0.000365813	0.00135829	0.0008205	BnaA03g39350D/BnaA10g01570D/BnaAnng40450D/BnaC02g31420D/BnaC02g32970D/BnaC03g46700D/BnaC04g09370D/BnaC05g42000D/BnaC08g45900D	9
GO:0044237	cellular metabolic process	40/12729	142/76374	0.000411915	0.00152626	0.00092196	BnaA01g13540D/BnaA01g22300D/BnaA02g22700D/BnaA03g19760D/BnaA03g39340D/BnaA05g11840D/BnaA05g34310D/BnaA06g12250D/BnaA06g17570D/BnaA06g38100D/BnaA07g17450D/BnaA08g24600D/BnaA09g10850D/BnaA09g22180D/BnaA09g23560D/BnaA10g21630D/BnaAnng30290D/BnaC01g15760D/BnaC01g37710D/BnaC01g43170D/BnaC02g12250D/BnaC02g22770D/BnaC02g31430D/BnaC02g33510D/BnaC03g46690D/BnaC04g22280D/BnaC04g23180D/BnaC05g49280D/BnaC06g…	40
GO:1901701	cellular response to oxygen-containing compound	17/12729	44/76374	0.000414028	0.00153086	0.000924741	BnaA02g30960D/BnaA03g23420D/BnaA05g09460D/BnaA05g10630D/BnaA06g12250D/BnaA08g08920D/BnaA09g50470D/BnaAnng12430D/BnaC02g09350D/BnaC02g12250D/BnaC02g22770D/BnaC02g39260D/BnaC04g39680D/BnaC06g43780D/BnaC08g11150D/BnaCnng23220D/BnaCnng64340D	17
GO:0000502	proteasome complex	14/12729	33/76374	0.000431687	0.00159281	0.000962162	BnaA03g56560D/BnaA04g22690D/BnaA05g05600D/BnaA08g28090D/BnaA09g50520D/BnaC01g07880D/BnaC02g24450D/BnaC03g07950D/BnaC03g22380D/BnaC04g53310D/BnaC07g13760D/BnaC08g01010D/BnaC08g13300D/BnaC08g43990D	14
GO:0048829	root cap development	23/12729	68/76374	0.000433133	0.0015948	0.000963366	BnaA01g07860D/BnaA01g10630D/BnaA03g58880D/BnaA07g00690D/BnaA07g00700D/BnaA07g15990D/BnaA08g09450D/BnaA08g13550D/BnaA09g33460D/BnaA09g37750D/BnaA09g37760D/BnaC01g09460D/BnaC01g12160D/BnaC03g63890D/BnaC06g14440D/BnaC06g17320D/BnaC07g00040D/BnaC07g41720D/BnaC08g13370D/BnaC08g24280D/BnaC08g48950D/BnaC08g48960D/BnaC09g42400D	23
GO:0010016	shoot system morphogenesis	12/12729	26/76374	0.000435252	0.00159925	0.000966057	BnaA01g30640D/BnaA03g05930D/BnaA03g06690D/BnaA07g25370D/BnaA10g17060D/BnaAnng15950D/BnaC01g38310D/BnaC02g13160D/BnaC03g07690D/BnaC06g27150D/BnaC09g40240D/BnaCnng62810D	12
GO:0010017	red or far-red light signaling pathway	25/12729	77/76374	0.000504741	0.00185072	0.00111796	BnaA02g00920D/BnaA03g18840D/BnaA03g56740D/BnaA04g22640D/BnaA04g26750D/BnaA05g01090D/BnaA05g05560D/BnaA07g19130D/BnaA09g39670D/BnaA10g21200D/BnaA10g26930D/BnaAnng00500D/BnaC02g03470D/BnaC03g54820D/BnaC03g72320D/BnaC04g00640D/BnaC04g05290D/BnaC04g05320D/BnaC04g51630D/BnaC04g56730D/BnaC06g42980D/BnaC08g32020D/BnaC09g45380D/BnaCnng03230D/BnaCnng20200D	25
GO:0004392	heme oxygenase (decyclizing) activity	11/12729	23/76374	0.000516879	0.00188736	0.00114009	BnaA01g15860D/BnaA07g12810D/BnaA09g27040D/BnaA10g09480D/BnaC01g18950D/BnaC06g17920D/BnaC06g27630D/BnaC07g16850D/BnaC08g12280D/BnaC09g31660D/BnaCnng72350D	11
GO:0033179	proton-transporting V-type ATPase, V0 domain	11/12729	23/76374	0.000516879	0.00188736	0.00114009	BnaA01g15850D/BnaA02g09150D/BnaA03g11480D/BnaA03g48260D/BnaA03g52040D/BnaA06g31360D/BnaA08g14330D/BnaC01g18940D/BnaC02g13180D/BnaC07g40570D/BnaC08g12260D	11
GO:0030042	actin filament depolymerization	16/12729	41/76374	0.000532962	0.00194206	0.00117313	BnaA01g02250D/BnaA01g06850D/BnaA03g53090D/BnaA08g13190D/BnaA09g51810D/BnaA10g00250D/BnaAnng10840D/BnaC01g03520D/BnaC01g08210D/BnaC03g68060D/BnaC05g00330D/BnaC06g12200D/BnaC07g50870D/BnaCnng29560D/BnaCnng08860D/BnaCnng02190D	16
GO:0010197	polar nucleus fusion	27/12729	86/76374	0.000559618	0.00203497	0.00122926	BnaA02g25890D/BnaA03g14210D/BnaA03g16450D/BnaA03g17100D/BnaA04g15350D/BnaA04g20970D/BnaA05g08310D/BnaA07g00340D/BnaA07g05610D/BnaA07g15650D/BnaA07g30190D/BnaA09g10290D/BnaA09g43720D/BnaA09g56020D/BnaC02g47740D/BnaC03g17190D/BnaC03g18220D/BnaC03g19820D/BnaC03g20620D/BnaC04g09330D/BnaC04g38300D/BnaC04g44970D/BnaC06g13860D/BnaC06g33630D/BnaC07g00380D/BnaC07g48050D/BnaC09g10460D	27
GO:0016165	linoleate 13S-lipoxygenase activity	17/12729	45/76374	0.000562827	0.00204243	0.00123376	BnaA01g21450D/BnaA01g36630D/BnaA03g15390D/BnaA04g19410D/BnaA05g10200D/BnaA05g33880D/BnaA06g06290D/BnaC01g31590D/BnaC03g18600D/BnaC04g11110D/BnaC04g43780D/BnaC05g30190D/BnaC05g46590D/BnaC05g48800D/BnaC07g01030D/BnaCnng70330D/BnaCnng77750D	17
GO:0006310	DNA recombination	38/12729	135/76374	0.000574196	0.00207939	0.00125609	BnaA01g04290D/BnaA01g05690D/BnaA03g00430D/BnaA03g29520D/BnaA05g07810D/BnaA05g27370D/BnaA05g29240D/BnaA07g08730D/BnaA07g25980D/BnaA07g28960D/BnaA07g35950D/BnaA08g12070D/BnaA08g16340D/BnaA08g31040D/BnaA09g44130D/BnaA10g30270D/BnaAnng31980D/BnaC01g00570D/BnaC01g05720D/BnaC03g00320D/BnaC03g62470D/BnaC03g62480D/BnaC03g67000D/BnaC03g67010D/BnaC03g76340D/BnaC04g05300D/BnaC04g08830D/BnaC06g27700D/BnaC06g…	38
GO:0009395	phospholipid catabolic process	10/12729	20/76374	0.000597374	0.00215889	0.00130411	BnaA02g09480D/BnaA02g27960D/BnaA03g24870D/BnaA03g24880D/BnaA03g36540D/BnaA09g21320D/BnaC03g66150D/BnaC03g73050D/BnaC09g23720D/BnaC09g23730D	10
GO:0009011	starch synthase activity	14/12729	34/76374	0.000621938	0.00224305	0.00135495	BnaA06g24630D/BnaA06g24640D/BnaA07g22440D/BnaA07g31160D/BnaA07g31180D/BnaAnng38950D/BnaC02g22590D/BnaC05g28320D/BnaC05g28330D/BnaC06g34850D/BnaC06g34870D/BnaCnng49890D/BnaCnng49900D/BnaCnng13270D	14
GO:0005344	oxygen carrier activity	7/12729	11/76374	0.000628617	0.00225329	0.00136114	BnaA01g04300D/BnaA03g26470D/BnaA07g03790D/BnaC01g05740D/BnaC01g44420D/BnaC03g31330D/BnaCnng57780D	7
GO:0006552	leucine catabolic process	7/12729	11/76374	0.000628617	0.00225329	0.00136114	BnaA03g50840D/BnaA06g38800D/BnaA08g11650D/BnaA09g50980D/BnaC03g55280D/BnaC03g77160D/BnaC08g45780D	7
GO:0034399	nuclear periphery	7/12729	11/76374	0.000628617	0.00225329	0.00136114	BnaA03g29360D/BnaA05g31040D/BnaA05g31050D/BnaC03g34640D/BnaC03g73260D/BnaC05g45540D/BnaC05g45550D	7
GO:0009113	purine nucleobase biosynthetic process	9/12729	17/76374	0.000662379	0.00235513	0.00142265	BnaA03g27160D/BnaA06g05760D/BnaA07g03700D/BnaA08g26110D/BnaC03g50420D/BnaC03g57930D/BnaC05g07310D/BnaC08g13890D/BnaC08g14960D	9
GO:0045876	positive regulation of sister chromatid cohesion	9/12729	17/76374	0.000662379	0.00235513	0.00142265	BnaA01g12740D/BnaA03g45660D/BnaC01g14470D/BnaC04g05300D/BnaC07g37760D/BnaCnng23110D/BnaCnng76590D/BnaCnng55190D/BnaCnng59290D	9
GO:0051307	meiotic chromosome separation	9/12729	17/76374	0.000662379	0.00235513	0.00142265	BnaA01g12740D/BnaA03g45660D/BnaC01g14470D/BnaC04g05300D/BnaC07g37760D/BnaCnng23110D/BnaCnng76590D/BnaCnng55190D/BnaCnng59290D	9
GO:0060548	negative regulation of cell death	9/12729	17/76374	0.000662379	0.00235513	0.00142265	BnaA01g05490D/BnaA06g21360D/BnaA06g40640D/BnaA08g16520D/BnaC01g40650D/BnaC01g40660D/BnaC03g52210D/BnaC03g60590D/BnaC07g47240D	9
GO:0010555	response to mannitol	15/12729	38/76374	0.000685018	0.00242543	0.00146513	BnaA03g08110D/BnaA04g27460D/BnaA07g33370D/BnaA09g00710D/BnaA09g39610D/BnaA10g12350D/BnaA10g14710D/BnaC02g23870D/BnaC03g10290D/BnaC04g21530D/BnaC06g37910D/BnaC08g31970D/BnaC09g34640D/BnaC09g37040D/BnaCnng23260D	15
GO:0000024	maltose biosynthetic process	8/12729	14/76374	0.000686288	0.00242543	0.00146513	BnaA01g35050D/BnaA03g44500D/BnaA08g30450D/BnaA08g30460D/BnaC03g63780D/BnaC03g63790D/BnaC07g36330D/BnaCnng39750D	8
GO:0019419	sulfate reduction	8/12729	14/76374	0.000686288	0.00242543	0.00146513	BnaA01g11840D/BnaA02g21080D/BnaA03g45080D/BnaA09g20370D/BnaC01g13420D/BnaC02g26090D/BnaC07g37060D/BnaC09g22760D	8
GO:0009579	thylakoid	65/12729	266/76374	0.000754505	0.00266118	0.00160753	BnaA01g13780D/BnaA01g13790D/BnaA01g27710D/BnaA02g18300D/BnaA02g18370D/BnaA02g18970D/BnaA03g14140D/BnaA03g14150D/BnaA03g25250D/BnaA03g34250D/BnaA03g41760D/BnaA03g46660D/BnaA04g05490D/BnaA04g10710D/BnaA04g16310D/BnaA04g17910D/BnaA05g00270D/BnaA05g23180D/BnaA06g15500D/BnaA06g23960D/BnaA06g29350D/BnaA06g39370D/BnaA07g10870D/BnaA07g33590D/BnaA07g34280D/BnaA08g00110D/BnaA08g14780D/BnaA08g21180D/BnaA09g…	65
GO:0008242	omega peptidase activity	11/12729	24/76374	0.000811044	0.00284918	0.00172109	BnaA02g19000D/BnaA03g05930D/BnaA04g28510D/BnaA07g25370D/BnaA07g34300D/BnaA07g34310D/BnaC02g25180D/BnaC03g07690D/BnaC06g27150D/BnaC06g39060D/BnaC06g39080D	11
GO:0015074	DNA integration	11/12729	24/76374	0.000811044	0.00284918	0.00172109	BnaA02g06900D/BnaA03g09310D/BnaA07g35000D/BnaA10g12700D/BnaAnng15960D/BnaC02g07390D/BnaC02g44310D/BnaC03g11640D/BnaC06g39930D/BnaC09g35000D/BnaCnng33390D	11
GO:0010358	leaf shaping	14/12729	35/76374	0.000878659	0.00308056	0.00186086	BnaA03g16620D/BnaA03g56820D/BnaA04g26200D/BnaA05g04870D/BnaA06g18830D/BnaA09g33180D/BnaAnng07500D/BnaC03g25350D/BnaC03g54740D/BnaC04g04210D/BnaC04g50200D/BnaC04g55260D/BnaC06g14080D/BnaC08g23970D	14
GO:0060255	regulation of macromolecule metabolic process	12/12729	28/76374	0.000988382	0.00345836	0.00208908	BnaA01g10070D/BnaA01g30640D/BnaA03g23420D/BnaA05g09460D/BnaA05g10630D/BnaA08g09300D/BnaA09g50470D/BnaAnng12430D/BnaC01g11890D/BnaC01g38310D/BnaC02g09350D/BnaC04g39680D	12
GO:0004427	inorganic diphosphatase activity	19/12729	55/76374	0.000990508	0.00345892	0.00208942	BnaA04g26810D/BnaA05g01040D/BnaA06g10340D/BnaA07g34510D/BnaA07g35600D/BnaA08g23780D/BnaA09g56670D/BnaAnng30840D/BnaAnng33120D/BnaC04g00590D/BnaC04g51570D/BnaC05g11930D/BnaC06g39260D/BnaC06g39350D/BnaC06g40530D/BnaC08g16730D/BnaC08g38730D/BnaCnng64390D/BnaCnng66360D	19
GO:0006334	nucleosome assembly	47/12729	181/76374	0.000995582	0.00346975	0.00209596	BnaA01g15300D/BnaA02g00780D/BnaA02g17330D/BnaA03g03180D/BnaA03g18140D/BnaA04g27780D/BnaA05g25620D/BnaA05g35660D/BnaA06g01520D/BnaA06g12980D/BnaA07g16430D/BnaA07g21610D/BnaA07g37520D/BnaA07g35970D/BnaA08g22410D/BnaA09g34410D/BnaA09g44140D/BnaA09g52940D/BnaA10g28950D/BnaA10g28990D/BnaA10g29000D/BnaAnng26750D/BnaC01g00910D/BnaC01g18120D/BnaC01g35960D/BnaC01g35970D/BnaC02g23680D/BnaC03g04590D/BnaC03g…	47
GO:0046933	proton-transporting ATP synthase activity, rotational mechanism	28/12729	94/76374	0.00112355	0.003908	0.0023607	BnaA03g02630D/BnaA03g15140D/BnaA03g26090D/BnaA04g19150D/BnaA05g10580D/BnaA07g11570D/BnaA07g11590D/BnaA07g32270D/BnaA08g21880D/BnaA09g00960D/BnaA10g22780D/BnaAnng39740D/BnaAnng05990D/BnaAnng06000D/BnaC02g01040D/BnaC02g27060D/BnaC03g03730D/BnaC03g18200D/BnaC03g18230D/BnaC03g30820D/BnaC04g11660D/BnaC04g43510D/BnaC06g36660D/BnaC06g37030D/BnaC07g15490D/BnaC09g00070D/BnaC09g47340D/BnaCnng20640D	28
GO:0031347	regulation of defense response	65/12729	270/76374	0.00113531	0.00394113	0.00238071	BnaA01g01450D/BnaA01g11330D/BnaA02g15930D/BnaA02g23800D/BnaA03g14140D/BnaA03g14150D/BnaA03g23420D/BnaA03g23760D/BnaA03g52200D/BnaA04g17910D/BnaA05g09460D/BnaA05g10630D/BnaA06g05210D/BnaA06g06960D/BnaA06g17570D/BnaA07g30050D/BnaA08g15180D/BnaA08g26700D/BnaA09g15640D/BnaA09g47680D/BnaA09g48640D/BnaA09g50470D/BnaA09g54870D/BnaAnng12430D/BnaAnng04540D/BnaC01g02460D/BnaC01g04900D/BnaC01g12770D/BnaC02g…	65
GO:0004616	phosphogluconate dehydrogenase (decarboxylating) activity	11/12729	25/76374	0.00123133	0.00426601	0.00257696	BnaA01g33010D/BnaA04g05720D/BnaA04g11280D/BnaA05g33580D/BnaA09g11470D/BnaA09g11480D/BnaC04g28430D/BnaC05g48310D/BnaC08g03060D/BnaC09g11930D/BnaCnng11100D	11
GO:0009787	regulation of abscisic acid-activated signaling pathway	8/12729	15/76374	0.00125588	0.00432555	0.00261292	BnaA02g06350D/BnaA06g38830D/BnaA06g38840D/BnaA10g13230D/BnaA10g29850D/BnaC03g55290D/BnaC09g43430D/BnaCnng38760D	8
GO:0031122	cytoplasmic microtubule organization	8/12729	15/76374	0.00125588	0.00432555	0.00261292	BnaA03g15460D/BnaA04g19510D/BnaA05g10130D/BnaC03g18670D/BnaC04g11060D/BnaC04g43900D/BnaCnng54380D/BnaCnng54390D	8
GO:0033587	shikimate biosynthetic process	8/12729	15/76374	0.00125588	0.00432555	0.00261292	BnaA02g01610D/BnaA03g04310D/BnaA08g02750D/BnaA10g19920D/BnaC02g04730D/BnaC03g05850D/BnaC03g07200D/BnaC09g43670D	8
GO:0004049	anthranilate synthase activity	7/12729	12/76374	0.00129124	0.00437878	0.00264507	BnaA03g01690D/BnaA03g21950D/BnaA10g24820D/BnaC03g02240D/BnaC03g26270D/BnaC04g23920D/BnaC09g49740D	7
GO:0004325	ferrochelatase activity	7/12729	12/76374	0.00129124	0.00437878	0.00264507	BnaA01g14100D/BnaA04g04640D/BnaA07g37640D/BnaA09g33830D/BnaC01g16600D/BnaC06g14830D/BnaC08g24600D	7
GO:0004379	glycylpeptide N-tetradecanoyltransferase activity	7/12729	12/76374	0.00129124	0.00437878	0.00264507	BnaA01g35290D/BnaA04g26790D/BnaA10g11040D/BnaC01g18060D/BnaC04g51530D/BnaC04g51580D/BnaC09g53700D	7
GO:0008886	glyceraldehyde-3-phosphate dehydrogenase (NADP+) (non-phosphorylating) activity	7/12729	12/76374	0.00129124	0.00437878	0.00264507	BnaA06g08510D/BnaA08g24270D/BnaA09g46260D/BnaC05g09880D/BnaC05g47450D/BnaC08g15900D/BnaC08g40330D	7
GO:0009102	biotin biosynthetic process	7/12729	12/76374	0.00129124	0.00437878	0.00264507	BnaA03g10210D/BnaA10g11520D/BnaC01g43270D/BnaC03g12880D/BnaC06g05970D/BnaC09g32740D/BnaCnng70850D	7
GO:0010064	embryonic shoot morphogenesis	7/12729	12/76374	0.00129124	0.00437878	0.00264507	BnaA01g35290D/BnaA04g26790D/BnaA10g11040D/BnaC01g18060D/BnaC04g51530D/BnaC04g51580D/BnaC09g53700D	7
GO:0052638	indole-3-butyrate beta-glucosyltransferase activity	7/12729	12/76374	0.00129124	0.00437878	0.00264507	BnaA03g14700D/BnaAnng25390D/BnaAnng25400D/BnaC03g17730D/BnaC03g17740D/BnaCnng43810D/BnaCnng62810D	7
GO:1900111	positive regulation of histone H3-K9 dimethylation	7/12729	12/76374	0.00129124	0.00437878	0.00264507	BnaA01g06810D/BnaA08g13150D/BnaAnng10940D/BnaC01g08200D/BnaC03g68030D/BnaC03g74580D/BnaCnng18840D	7
GO:0009628	response to abiotic stimulus	18/12729	52/76374	0.00129714	0.00439032	0.00265205	BnaA01g15720D/BnaA05g34310D/BnaA07g17450D/BnaA07g37680D/BnaA08g19110D/BnaA10g07970D/BnaAnng30290D/BnaC01g13960D/BnaC01g25090D/BnaC02g45840D/BnaC04g35710D/BnaC07g19770D/BnaC08g03800D/BnaC09g07480D/BnaC09g19700D/BnaC09g27850D/BnaCnng04970D/BnaCnng49010D	18
GO:0043130	ubiquitin binding	16/12729	44/76374	0.00130743	0.00441667	0.00266796	BnaA04g08670D/BnaA06g10810D/BnaA06g13370D/BnaA07g14440D/BnaA07g20230D/BnaA08g22120D/BnaA09g56400D/BnaC03g33000D/BnaC03g41120D/BnaC04g30910D/BnaC05g12320D/BnaC05g14930D/BnaC06g19700D/BnaC08g18690D/BnaC08g38480D/BnaCnng32650D	16
GO:0016161	beta-amylase activity	17/12729	48/76374	0.00131197	0.00442351	0.00267209	BnaA01g35050D/BnaA03g40550D/BnaA03g44500D/BnaA05g05170D/BnaA06g24650D/BnaA08g30450D/BnaA08g30460D/BnaAnng26370D/BnaC02g05440D/BnaC02g32660D/BnaC03g63780D/BnaC03g63790D/BnaC04g04570D/BnaC07g31500D/BnaC07g36330D/BnaCnng39750D/BnaCnng13280D	17
GO:0006289	nucleotide-excision repair	23/12729	73/76374	0.00131489	0.00442485	0.00267291	BnaA02g14670D/BnaA04g08670D/BnaA05g25620D/BnaA06g10810D/BnaA06g29440D/BnaA07g14440D/BnaA07g20230D/BnaA09g03410D/BnaA09g56400D/BnaA10g18220D/BnaA10g18230D/BnaC03g33000D/BnaC04g30910D/BnaC05g12320D/BnaC05g39520D/BnaC06g19700D/BnaC06g42440D/BnaC07g27280D/BnaC08g38480D/BnaC09g41740D/BnaC09g41750D/BnaCnng26250D/BnaCnng32650D	23
GO:0010118	stomatal movement	46/12729	179/76374	0.00140773	0.00472827	0.00285619	BnaA02g20550D/BnaA02g35430D/BnaA03g11120D/BnaA03g15390D/BnaA04g19410D/BnaA05g10200D/BnaA05g17490D/BnaA05g29640D/BnaA06g03880D/BnaA06g05130D/BnaA06g08060D/BnaA07g22090D/BnaA08g26140D/BnaA08g26750D/BnaA08g27870D/BnaA09g40060D/BnaA10g02550D/BnaA10g12140D/BnaAnng00100D/BnaC02g12710D/BnaC02g27300D/BnaC02g40220D/BnaC03g13890D/BnaC03g18600D/BnaC04g11110D/BnaC04g41780D/BnaC04g43780D/BnaC05g02520D/BnaC05g…	46
GO:0005741	mitochondrial outer membrane	21/12729	65/76374	0.00147034	0.00492914	0.00297753	BnaA02g02470D/BnaA03g03460D/BnaA03g10240D/BnaA03g17200D/BnaA03g27530D/BnaA05g07100D/BnaA05g37480D/BnaA10g11490D/BnaA10g29750D/BnaC03g04950D/BnaC03g12920D/BnaC03g32540D/BnaC04g07900D/BnaC09g32780D/BnaCnng69120D/BnaCnng35390D/BnaCnng35410D/BnaCnng42590D/BnaCnng05760D/BnaCnng48140D/BnaCnng52100D	21
GO:0010015	root morphogenesis	34/12729	123/76374	0.00152121	0.00508999	0.00307469	BnaA02g02080D/BnaA02g30490D/BnaA02g35120D/BnaA03g07160D/BnaA03g57860D/BnaA03g57870D/BnaA05g30530D/BnaA06g03850D/BnaA07g04790D/BnaA08g03320D/BnaA08g09070D/BnaA09g03190D/BnaA09g35820D/BnaA10g10010D/BnaA10g16420D/BnaAnng25980D/BnaC01g18770D/BnaC02g08130D/BnaC02g12740D/BnaC02g38820D/BnaC02g38830D/BnaC03g09080D/BnaC03g44490D/BnaC03g44500D/BnaC03g65450D/BnaC05g44980D/BnaC07g47930D/BnaC08g03600D/BnaC08g…	34
GO:0045087	innate immune response	45/12729	175/76374	0.00155301	0.00518652	0.00313301	BnaA01g08380D/BnaA01g08400D/BnaA01g08410D/BnaA01g14120D/BnaA03g15010D/BnaA03g18380D/BnaA03g18390D/BnaA03g23420D/BnaA03g46910D/BnaA04g12350D/BnaA05g09460D/BnaA06g17570D/BnaA07g06710D/BnaA07g22860D/BnaA07g30590D/BnaA08g14640D/BnaA09g50470D/BnaAnng35580D/BnaAnng12430D/BnaAnng38040D/BnaC01g09930D/BnaC01g09940D/BnaC01g09950D/BnaC02g09350D/BnaC02g12250D/BnaC02g22770D/BnaC03g21900D/BnaC04g12150D/BnaC04g…	45
GO:0048509	regulation of meristem development	13/12729	33/76374	0.00157387	0.00524622	0.00316907	BnaA01g18430D/BnaA05g02100D/BnaA06g07490D/BnaA06g13000D/BnaA07g13040D/BnaA08g22380D/BnaA09g44460D/BnaC01g41870D/BnaC04g17070D/BnaC04g38630D/BnaC05g14490D/BnaC08g18380D/BnaC08g37040D	13
GO:0009556	microsporogenesis	48/12729	190/76374	0.00165541	0.00550761	0.00332696	BnaA01g08630D/BnaA02g01360D/BnaA03g43290D/BnaA04g12990D/BnaA05g11020D/BnaA05g11050D/BnaA05g11060D/BnaA07g18170D/BnaA08g29750D/BnaA09g08350D/BnaA09g08360D/BnaA09g14070D/BnaA09g42480D/BnaA09g49880D/BnaA10g00110D/BnaA10g03730D/BnaA10g04230D/BnaA10g20270D/BnaA10g23720D/BnaC02g04450D/BnaC02g40760D/BnaC03g52310D/BnaC04g12720D/BnaC04g12780D/BnaC04g13830D/BnaC04g35060D/BnaC04g54260D/BnaC04g54270D/BnaC05g…	48
GO:0000175	3'-5'-exoribonuclease activity	15/12729	41/76374	0.00170838	0.00566241	0.00342048	BnaA05g29900D/BnaA07g38150D/BnaA08g16560D/BnaA09g39340D/BnaA10g27250D/BnaAnng05810D/BnaC01g39710D/BnaC03g60540D/BnaC05g44220D/BnaC06g18060D/BnaC06g42860D/BnaC07g18690D/BnaC08g31490D/BnaCnng03580D/BnaCnng78700D	15
GO:0010120	camalexin biosynthetic process	15/12729	41/76374	0.00170838	0.00566241	0.00342048	BnaA01g18990D/BnaA03g19960D/BnaA03g20470D/BnaA04g24740D/BnaA05g03550D/BnaA05g34370D/BnaA06g18440D/BnaC03g23960D/BnaC03g24480D/BnaC03g24500D/BnaC03g55440D/BnaC04g03080D/BnaC04g22730D/BnaC04g48620D/BnaC04g52880D	15
GO:0004034	aldose 1-epimerase activity	16/12729	45/76374	0.00171825	0.00567377	0.00342734	BnaA01g27130D/BnaA03g05250D/BnaA03g27550D/BnaA05g22280D/BnaA06g17140D/BnaA10g18960D/BnaC01g21330D/BnaC01g34580D/BnaC03g06790D/BnaC03g32560D/BnaC03g57220D/BnaC05g15460D/BnaC05g20020D/BnaC05g23970D/BnaC05g35520D/BnaCnng30290D	16
GO:0032502	developmental process	16/12729	45/76374	0.00171825	0.00567377	0.00342734	BnaA02g14510D/BnaA05g28420D/BnaA06g09110D/BnaA07g24130D/BnaA07g28280D/BnaA08g24040D/BnaA09g36530D/BnaA09g45620D/BnaC02g19510D/BnaC05g10550D/BnaC05g42710D/BnaC06g27870D/BnaC06g43320D/BnaC08g16090D/BnaC08g28110D/BnaC08g39710D	16
GO:0010268	brassinosteroid homeostasis	11/12729	26/76374	0.00181511	0.0059824	0.00361377	BnaA01g01320D/BnaA01g05490D/BnaA06g40640D/BnaA08g16520D/BnaAnng19730D/BnaC01g02330D/BnaC01g40650D/BnaC01g40660D/BnaC03g60590D/BnaC07g47240D/BnaC07g51130D	11
GO:0045333	cellular respiration	21/12729	66/76374	0.00182217	0.00599443	0.00362104	BnaA01g15010D/BnaA04g20220D/BnaA05g09320D/BnaA06g22690D/BnaA06g31360D/BnaAnng35860D/BnaC01g17730D/BnaC02g31330D/BnaC03g50930D/BnaC04g10720D/BnaC04g10930D/BnaC04g28130D/BnaC07g09720D/BnaC07g25250D/BnaC08g07260D/BnaC08g21420D/BnaC08g26850D/BnaC09g01800D/BnaCnng12470D/BnaCnng12820D/BnaCnng17350D	21
GO:0016597	amino acid binding	30/12729	106/76374	0.00187448	0.006155	0.00371803	BnaA01g02930D/BnaA02g01540D/BnaA03g01400D/BnaA03g35260D/BnaA03g50990D/BnaA07g02330D/BnaA07g21080D/BnaA07g33230D/BnaA08g11320D/BnaA08g17100D/BnaA08g22970D/BnaA09g24750D/BnaA10g20010D/BnaA10g25540D/BnaAnng17990D/BnaAnng01030D/BnaC01g04190D/BnaC02g02600D/BnaC02g04620D/BnaC03g01710D/BnaC03g40970D/BnaC03g59990D/BnaC03g77030D/BnaC03g77040D/BnaC06g21200D/BnaC06g37790D/BnaC08g17520D/BnaC09g43800D/BnaC09g…	30
GO:0046914	transition metal ion binding	20/12729	62/76374	0.00192498	0.00630906	0.00381109	BnaA02g28570D/BnaA02g34640D/BnaA03g27510D/BnaA05g13570D/BnaA06g04850D/BnaA06g32440D/BnaA07g06360D/BnaA09g16580D/BnaA09g22250D/BnaAnng40950D/BnaC02g13220D/BnaC02g36630D/BnaC03g32510D/BnaC03g59410D/BnaC03g59420D/BnaC04g20430D/BnaC05g26750D/BnaC07g07940D/BnaC07g48980D/BnaCnng05740D	20
GO:0048196	obsolete plant extracellular matrix	8/12729	16/76374	0.00214595	0.00702022	0.00424068	BnaA01g06940D/BnaA03g49910D/BnaA07g36110D/BnaA09g52900D/BnaA09g52920D/BnaAnng33760D/BnaC01g08350D/BnaC07g02390D	8
GO:0044424	obsolete intracellular part	33/12729	121/76374	0.00224529	0.00733154	0.00442874	BnaA01g21360D/BnaA02g29700D/BnaA03g48140D/BnaA06g07420D/BnaA07g35180D/BnaA07g37680D/BnaA08g04310D/BnaA08g27560D/BnaA09g08070D/BnaA09g29100D/BnaAnng02790D/BnaAnng17010D/BnaAnng20510D/BnaAnng33430D/BnaC01g33620D/BnaC03g44910D/BnaC03g52650D/BnaC03g72530D/BnaC04g22700D/BnaC04g41080D/BnaC05g15690D/BnaC05g17850D/BnaC05g20160D/BnaC05g22600D/BnaC07g16690D/BnaC08g06080D/BnaC08g43910D/BnaC09g04360D/BnaC09g…	33
GO:0005546	phosphatidylinositol-4,5-bisphosphate binding	15/12729	42/76374	0.00225262	0.00734187	0.00443498	BnaA02g09480D/BnaA02g27960D/BnaA03g24870D/BnaA03g24880D/BnaA03g36540D/BnaA09g21320D/BnaA10g00160D/BnaAnng13600D/BnaC03g66150D/BnaC03g72910D/BnaC03g73050D/BnaC05g00230D/BnaC09g23720D/BnaC09g23730D/BnaCnng23890D	15
GO:0009902	chloroplast relocation	80/12729	354/76374	0.00234235	0.00762022	0.00460313	BnaA01g26770D/BnaA01g30020D/BnaA01g30270D/BnaA02g01690D/BnaA03g13610D/BnaA03g32670D/BnaA03g39590D/BnaA04g17180D/BnaA04g26420D/BnaA05g02780D/BnaA05g05110D/BnaA05g21740D/BnaA05g26150D/BnaA05g26710D/BnaA05g33830D/BnaA06g07940D/BnaA06g17600D/BnaA06g29350D/BnaA06g38740D/BnaA06g39370D/BnaA07g06250D/BnaA07g32060D/BnaA08g06270D/BnaA08g16560D/BnaA08g25080D/BnaA09g10640D/BnaA09g12770D/BnaA09g15360D/BnaA09g…	80
GO:0048513	animal organ development	23/12729	76/76374	0.00237585	0.00770829	0.00465633	BnaA01g15720D/BnaA01g30640D/BnaA02g09130D/BnaA02g13990D/BnaA03g16450D/BnaA03g22070D/BnaA03g52940D/BnaA04g16520D/BnaA04g20970D/BnaA05g08310D/BnaA09g37820D/BnaC01g16100D/BnaC01g38310D/BnaC02g13160D/BnaC03g19820D/BnaC03g26450D/BnaC03g46250D/BnaC04g09330D/BnaC04g39860D/BnaC04g44970D/BnaC06g32510D/BnaC06g43780D/BnaCnng49010D	23
GO:0010480	microsporocyte differentiation	7/12729	13/76374	0.0023957	0.00770829	0.00465633	BnaA03g40550D/BnaA06g24650D/BnaAnng26370D/BnaC02g05440D/BnaC02g32660D/BnaC07g31500D/BnaCnng13280D	7
GO:0031167	rRNA methylation	7/12729	13/76374	0.0023957	0.00770829	0.00465633	BnaA03g21780D/BnaA05g00540D/BnaA07g12730D/BnaC03g26050D/BnaC04g51980D/BnaCnng46850D/BnaCnng08920D	7
GO:0032025	response to cobalt ion	7/12729	13/76374	0.0023957	0.00770829	0.00465633	BnaA01g32870D/BnaA05g33470D/BnaA09g40630D/BnaAnng24620D/BnaC01g41980D/BnaC05g48220D/BnaC08g03320D	7
GO:0042425	choline biosynthetic process	7/12729	13/76374	0.0023957	0.00770829	0.00465633	BnaA01g35290D/BnaA04g26790D/BnaA10g11040D/BnaC01g18060D/BnaC04g51530D/BnaC04g51580D/BnaC09g53700D	7
GO:0047274	galactinol-sucrose galactosyltransferase activity	7/12729	13/76374	0.0023957	0.00770829	0.00465633	BnaA08g00340D/BnaA09g36810D/BnaC03g70760D/BnaC03g70770D/BnaC04g55490D/BnaC08g28500D/BnaCnng07360D	7
GO:0007204	positive regulation of cytosolic calcium ion concentration	6/12729	10/76374	0.00243637	0.00776812	0.00469247	BnaA04g19510D/BnaA05g10130D/BnaC04g11060D/BnaC04g43900D/BnaCnng54380D/BnaCnng54390D	6
GO:0015269	calcium-activated potassium channel activity	6/12729	10/76374	0.00243637	0.00776812	0.00469247	BnaA01g21820D/BnaA03g11290D/BnaA10g09810D/BnaC01g28140D/BnaC03g71700D/BnaC09g32260D	6
GO:0030089	phycobilisome	6/12729	10/76374	0.00243637	0.00776812	0.00469247	BnaA02g04500D/BnaA03g07760D/BnaA10g15380D/BnaC02g09040D/BnaC03g09760D/BnaC09g37860D	6
GO:0050850	positive regulation of calcium-mediated signaling	6/12729	10/76374	0.00243637	0.00776812	0.00469247	BnaA04g19510D/BnaA05g10130D/BnaC04g11060D/BnaC04g43900D/BnaCnng54380D/BnaCnng54390D	6
GO:0051170	import into nucleus	6/12729	10/76374	0.00243637	0.00776812	0.00469247	BnaA02g32550D/BnaA06g26980D/BnaA09g04840D/BnaC02g48700D/BnaC07g29960D/BnaC09g04380D	6
GO:0045595	regulation of cell differentiation	49/12729	199/76374	0.00263223	0.00837745	0.00506054	BnaA01g12740D/BnaA01g27690D/BnaA03g15940D/BnaA03g26120D/BnaA03g42250D/BnaA03g45660D/BnaA06g00360D/BnaA06g15750D/BnaA06g21130D/BnaA07g08390D/BnaA07g14790D/BnaA07g37680D/BnaA08g11670D/BnaA08g18290D/BnaA09g00890D/BnaA09g15880D/BnaA09g27240D/BnaA09g36280D/BnaA09g51080D/BnaA10g01560D/BnaC01g14470D/BnaC01g22210D/BnaC01g35220D/BnaC03g19070D/BnaC03g30850D/BnaC03g52350D/BnaC03g52360D/BnaC03g53900D/BnaC03g…	49
GO:0048522	positive regulation of cellular process	18/12729	55/76374	0.00265336	0.00842943	0.00509194	BnaA02g15740D/BnaA06g11910D/BnaA07g19720D/BnaA07g23270D/BnaA09g43930D/BnaA10g12910D/BnaA10g26790D/BnaAnng00600D/BnaC02g03390D/BnaC02g21000D/BnaC04g07460D/BnaC04g55470D/BnaC04g51950D/BnaC05g50020D/BnaC06g18980D/BnaCnng75030D/BnaCnng03080D/BnaCnng07660D	18
GO:0005337	nucleoside transmembrane transporter activity	12/12729	31/76374	0.00281211	0.00891768	0.00538687	BnaA01g02100D/BnaA01g19420D/BnaA01g19430D/BnaA06g14680D/BnaA08g21610D/BnaA09g32040D/BnaC01g03250D/BnaC01g23380D/BnaC05g16060D/BnaC08g19500D/BnaC08g22860D/BnaCnng48010D	12
GO:0052543	callose deposition in cell wall	35/12729	132/76374	0.00281944	0.00891875	0.00538752	BnaA01g08630D/BnaA02g01360D/BnaA03g43290D/BnaA04g12990D/BnaA05g11020D/BnaA05g11050D/BnaA05g11060D/BnaA07g18170D/BnaA09g14070D/BnaA09g42480D/BnaA09g49880D/BnaA10g03730D/BnaA10g04230D/BnaA10g20270D/BnaC02g04450D/BnaC03g52310D/BnaC04g12720D/BnaC04g12780D/BnaC04g13830D/BnaC04g35060D/BnaC04g54260D/BnaC04g54270D/BnaC05g03680D/BnaC05g04460D/BnaC05g04470D/BnaC06g17090D/BnaC06g32300D/BnaC07g34680D/BnaC07g…	35
GO:0010452	histone H3-K36 methylation	9/12729	20/76374	0.00283778	0.00891875	0.00538752	BnaA01g05410D/BnaA05g28760D/BnaA07g33460D/BnaA08g16610D/BnaC01g00280D/BnaC02g23610D/BnaC03g60490D/BnaC05g43230D/BnaC06g38010D	9
GO:0016229	steroid dehydrogenase activity	9/12729	20/76374	0.00283778	0.00891875	0.00538752	BnaA03g17400D/BnaA03g17410D/BnaA05g06810D/BnaA05g34870D/BnaC03g72040D/BnaC03g72060D/BnaC04g53500D/BnaC04g53530D/BnaC04g53540D	9
GO:0045261	proton-transporting ATP synthase complex, catalytic core F(1)	9/12729	20/76374	0.00283778	0.00891875	0.00538752	BnaA03g15140D/BnaA04g19150D/BnaA05g10580D/BnaAnng39740D/BnaC03g18200D/BnaC03g18230D/BnaC04g11660D/BnaC04g43510D/BnaC06g37030D	9
GO:0070401	NADP+ binding	9/12729	20/76374	0.00283778	0.00891875	0.00538752	BnaA03g17400D/BnaA03g17410D/BnaA05g06810D/BnaA05g34870D/BnaC03g72040D/BnaC03g72060D/BnaC04g53500D/BnaC04g53530D/BnaC04g53540D	9
GO:0010078	maintenance of root meristem identity	13/12729	35/76374	0.00292217	0.0091676	0.00553784	BnaA01g07860D/BnaA03g58880D/BnaA04g15690D/BnaA07g13090D/BnaA08g13550D/BnaC01g07880D/BnaC01g09460D/BnaC04g17010D/BnaC04g38970D/BnaC07g13760D/BnaC07g41720D/BnaC08g13300D/BnaC08g13370D	13
GO:0016621	cinnamoyl-CoA reductase activity	15/12729	43/76374	0.00293301	0.00918522	0.00554849	BnaA01g05410D/BnaA03g18380D/BnaA03g18390D/BnaA04g12350D/BnaA05g28760D/BnaA08g16610D/BnaAnng35580D/BnaC01g00280D/BnaC02g23610D/BnaC03g21900D/BnaC03g60490D/BnaC05g43230D/BnaC07g08560D/BnaC08g49360D/BnaUnng05060D	15
GO:0016197	endosomal transport	28/12729	100/76374	0.00308271	0.00963688	0.00582132	BnaA02g14320D/BnaA02g26550D/BnaA03g02440D/BnaA06g09230D/BnaA06g34030D/BnaA07g09410D/BnaA08g24010D/BnaA08g24020D/BnaA09g19140D/BnaA09g57120D/BnaA10g23070D/BnaAnng14670D/BnaC02g19220D/BnaC02g34760D/BnaC03g03450D/BnaC03g18500D/BnaC05g10640D/BnaC05g40940D/BnaC05g49100D/BnaC06g20330D/BnaC07g12350D/BnaC07g21870D/BnaC07g48520D/BnaC08g16110D/BnaC08g39660D/BnaC09g21080D/BnaC09g47620D/BnaCnng51240D	28
GO:0010311	lateral root formation	44/12729	176/76374	0.00310055	0.00967546	0.00584463	BnaA01g07860D/BnaA01g21450D/BnaA01g36630D/BnaA03g01690D/BnaA03g58880D/BnaA05g33630D/BnaA06g12980D/BnaA06g13320D/BnaA07g15990D/BnaA08g13550D/BnaA08g18230D/BnaA08g22150D/BnaA08g22410D/BnaA09g33460D/BnaA09g37750D/BnaA09g37760D/BnaA09g44280D/BnaA10g24820D/BnaAnng16780D/BnaC01g09460D/BnaC01g31590D/BnaC03g02240D/BnaC03g02780D/BnaC03g58790D/BnaC04g16560D/BnaC04g16570D/BnaC05g14430D/BnaC05g14880D/BnaC05g…	44
GO:0030126	COPI vesicle coat	21/12729	69/76374	0.00333303	0.010367	0.00626235	BnaA01g05610D/BnaA06g40470D/BnaA06g40490D/BnaA06g40500D/BnaA06g40510D/BnaA08g16430D/BnaA08g16450D/BnaA09g43220D/BnaC01g00490D/BnaC01g14550D/BnaC03g76410D/BnaC04g34740D/BnaC07g47040D/BnaC07g47050D/BnaC07g47060D/BnaC07g47070D/BnaC07g47080D/BnaC08g35740D/BnaC08g35750D/BnaC08g35770D/BnaC09g46600D	21
GO:0045038	protein import into chloroplast thylakoid membrane	10/12729	24/76374	0.00333393	0.010367	0.00626235	BnaA04g26420D/BnaA05g05110D/BnaA10g26220D/BnaAnng00870D/BnaC02g02820D/BnaC02g02830D/BnaC04g04490D/BnaC04g50450D/BnaCnng45490D/BnaCnng10600D	10
GO:0043090	amino acid import	87/12729	395/76374	0.00337266	0.0104689	0.00632394	BnaA01g16510D/BnaA01g26430D/BnaA01g33010D/BnaA02g14660D/BnaA03g13720D/BnaA03g26120D/BnaA03g27950D/BnaA03g41770D/BnaA03g48640D/BnaA04g03750D/BnaA04g05470D/BnaA04g17280D/BnaA04g26870D/BnaA05g12250D/BnaA05g25910D/BnaA05g33430D/BnaA05g33580D/BnaA06g05340D/BnaA06g39540D/BnaA07g08680D/BnaA07g14790D/BnaA07g24340D/BnaA07g27780D/BnaA08g00410D/BnaA08g11670D/BnaA08g14070D/BnaA08g18670D/BnaA08g26520D/BnaA09g…	87
GO:0042023	DNA endoreduplication	91/12729	416/76374	0.00340155	0.01054	0.00636687	BnaA01g07860D/BnaA01g12740D/BnaA01g20470D/BnaA01g26020D/BnaA02g04940D/BnaA02g31220D/BnaA03g01760D/BnaA03g01900D/BnaA03g02540D/BnaA03g04990D/BnaA03g05700D/BnaA03g45660D/BnaA03g46850D/BnaA03g49830D/BnaA03g56030D/BnaA03g58880D/BnaA06g28650D/BnaA06g37360D/BnaA07g01400D/BnaA07g03310D/BnaA07g08190D/BnaA07g10820D/BnaA08g13550D/BnaA08g16920D/BnaA08g18140D/BnaA08g27310D/BnaA08g29630D/BnaA09g03810D/BnaA09g…	91
GO:0016570	histone modification	36/12729	139/76374	0.00378336	0.0117025	0.00706909	BnaA02g01670D/BnaA02g07770D/BnaA02g12070D/BnaA03g04360D/BnaA03g09860D/BnaA03g41160D/BnaA03g41170D/BnaA03g51290D/BnaA03g58630D/BnaA05g22000D/BnaA08g12690D/BnaA09g54650D/BnaA10g29210D/BnaAnng11080D/BnaAnng08120D/BnaC01g07310D/BnaC01g14560D/BnaC02g01100D/BnaC02g04790D/BnaC02g10840D/BnaC02g15600D/BnaC02g40620D/BnaC02g45200D/BnaC03g05900D/BnaC03g12490D/BnaC03g35740D/BnaC03g77370D/BnaC04g05300D/BnaC05g…	36
GO:0009873	ethylene-activated signaling pathway	104/12729	486/76374	0.00379238	0.0117098	0.00707351	BnaA01g02240D/BnaA01g15250D/BnaA01g17860D/BnaA01g20940D/BnaA01g21880D/BnaA01g23930D/BnaA01g34910D/BnaA02g05510D/BnaA03g08430D/BnaA03g16450D/BnaA03g20470D/BnaA03g37010D/BnaA03g39240D/BnaA03g47830D/BnaA03g53110D/BnaA04g11980D/BnaA04g20970D/BnaA04g26870D/BnaA05g03550D/BnaA05g05710D/BnaA05g08310D/BnaA05g35460D/BnaA06g06010D/BnaA06g40170D/BnaA06g38950D/BnaA07g01140D/BnaA07g05600D/BnaA07g06740D/BnaA07g…	104
GO:0005742	mitochondrial outer membrane translocase complex	12/12729	32/76374	0.00382502	0.0117899	0.0071219	BnaA01g25720D/BnaA03g35540D/BnaA05g19160D/BnaA07g08810D/BnaA08g19020D/BnaA09g27920D/BnaC01g32850D/BnaC03g41320D/BnaC03g57640D/BnaC05g21320D/BnaC05g32550D/BnaC07g11430D	12
GO:0010205	photoinhibition	14/12729	40/76374	0.00386001	0.011877	0.00717448	BnaA01g12060D/BnaA01g34410D/BnaA03g25300D/BnaA05g32590D/BnaA09g20620D/BnaA10g11080D/BnaC03g29750D/BnaC05g47830D/BnaC05g48260D/BnaC08g12100D/BnaC09g22960D/BnaC09g53650D/BnaCnng74600D/BnaCnng18490D	14
GO:0044444	obsolete cytoplasmic part	23/12729	79/76374	0.00408601	0.0125434	0.00757706	BnaA01g04400D/BnaA01g22940D/BnaA04g05470D/BnaA05g24550D/BnaA07g15420D/BnaA10g01570D/BnaA10g24290D/BnaAnng06880D/BnaC01g05830D/BnaC02g31430D/BnaC03g46700D/BnaC03g67570D/BnaC04g28650D/BnaC05g38550D/BnaC07g46970D/BnaC08g03930D/BnaC08g45900D/BnaC09g10740D/BnaC09g13460D/BnaC09g13910D/BnaCnng68410D/BnaCnng72860D/BnaCnng42680D	23
GO:0005740	mitochondrial envelope	18/12729	57/76374	0.00409547	0.0125434	0.00757706	BnaA03g16750D/BnaA05g07770D/BnaA05g29640D/BnaA06g08510D/BnaA08g24270D/BnaA08g26140D/BnaA09g46260D/BnaAnng21140D/BnaC03g20200D/BnaC04g08780D/BnaC04g41780D/BnaC05g09880D/BnaC05g43970D/BnaC05g47450D/BnaC08g13860D/BnaC08g15900D/BnaC08g24110D/BnaC08g40330D	18
GO:0043617	cellular response to sucrose starvation	7/12729	14/76374	0.00410512	0.0125434	0.00757706	BnaA06g17510D/BnaA06g20540D/BnaA08g00430D/BnaC03g53730D/BnaC03g70580D/BnaC03g75390D/BnaCnng72260D	7
GO:0048657	anther wall tapetum cell differentiation	7/12729	14/76374	0.00410512	0.0125434	0.00757706	BnaA01g05490D/BnaA06g40640D/BnaA08g16520D/BnaC01g40650D/BnaC01g40660D/BnaC03g60590D/BnaC07g47240D	7
GO:0046982	protein heterodimerization activity	95/12729	440/76374	0.0041864	0.0127696	0.00771369	BnaA01g02570D/BnaA01g05490D/BnaA01g18430D/BnaA02g00780D/BnaA02g17180D/BnaA02g17330D/BnaA02g30530D/BnaA02g31000D/BnaA03g03180D/BnaA03g13400D/BnaA03g16450D/BnaA03g18140D/BnaA03g52920D/BnaA04g20970D/BnaA04g27780D/BnaA05g02100D/BnaA05g08310D/BnaA05g30580D/BnaA05g35660D/BnaA06g01520D/BnaA06g05230D/BnaA06g07490D/BnaA06g25370D/BnaA06g29270D/BnaA06g29740D/BnaA06g40640D/BnaA07g01890D/BnaA07g04710D/BnaA07g…	95
GO:0016149	translation release factor activity, codon specific	9/12729	21/76374	0.00423817	0.0128829	0.00778211	BnaA06g30550D/BnaA08g24510D/BnaAnng14180D/BnaC02g38280D/BnaC03g20980D/BnaC03g57000D/BnaC05g09190D/BnaC07g26240D/BnaC09g01130D	9
GO:0033591	response to L-ascorbic acid	9/12729	21/76374	0.00423817	0.0128829	0.00778211	BnaA01g32870D/BnaA02g12790D/BnaA05g33470D/BnaA09g40630D/BnaAnng24620D/BnaC01g41980D/BnaC02g17130D/BnaC05g48220D/BnaC08g03320D	9
GO:0010260	animal organ senescence	44/12729	179/76374	0.0043294	0.0131375	0.00793593	BnaA01g03990D/BnaA01g07160D/BnaA01g33280D/BnaA02g01570D/BnaA02g22520D/BnaA02g29720D/BnaA03g04290D/BnaA03g27640D/BnaA05g00710D/BnaA05g34100D/BnaA06g26770D/BnaA06g31030D/BnaA06g36140D/BnaA06g36290D/BnaA07g22440D/BnaA07g31160D/BnaA07g31180D/BnaA08g03270D/BnaA09g17880D/BnaA10g19960D/BnaC01g08640D/BnaC02g04660D/BnaC02g22590D/BnaC02g23020D/BnaC02g30780D/BnaC02g30790D/BnaC02g37730D/BnaC03g05820D/BnaC04g…	44
GO:0051049	regulation of transport	20/12729	66/76374	0.00434838	0.0131724	0.00795699	BnaA01g33660D/BnaA03g22030D/BnaA04g03370D/BnaA04g16730D/BnaA05g05680D/BnaA05g33200D/BnaA07g14360D/BnaA08g24270D/BnaA09g35350D/BnaC01g40210D/BnaC02g17340D/BnaC03g26400D/BnaC04g05460D/BnaC04g15350D/BnaC04g25270D/BnaC04g40090D/BnaC05g09880D/BnaC05g47450D/BnaC08g15900D/BnaC08g26710D	20
GO:0006788	heme oxidation	6/12729	11/76374	0.00460567	0.0138092	0.00834165	BnaA07g12810D/BnaA09g27040D/BnaC06g17920D/BnaC06g27630D/BnaC07g16850D/BnaCnng72350D	6
GO:0008517	folic acid transmembrane transporter activity	6/12729	11/76374	0.00460567	0.0138092	0.00834165	BnaA05g17490D/BnaA06g03880D/BnaA09g40060D/BnaC05g25600D/BnaC06g01910D/BnaC08g32420D	6
GO:0010201	response to continuous far red light stimulus by the high-irradiance response system	6/12729	11/76374	0.00460567	0.0138092	0.00834165	BnaA03g16450D/BnaA04g20970D/BnaA05g08310D/BnaC03g19820D/BnaC04g09330D/BnaC04g44970D	6
GO:0034450	ubiquitin-ubiquitin ligase activity	6/12729	11/76374	0.00460567	0.0138092	0.00834165	BnaA01g27060D/BnaA03g38690D/BnaA05g17070D/BnaA09g42890D/BnaC01g32890D/BnaC08g35440D	6
GO:0035281	pre-miRNA export from nucleus	6/12729	11/76374	0.00460567	0.0138092	0.00834165	BnaA01g33380D/BnaA05g32120D/BnaA06g28940D/BnaC01g39870D/BnaC02g39590D/BnaC07g27730D	6
GO:0048255	mRNA stabilization	6/12729	11/76374	0.00460567	0.0138092	0.00834165	BnaA04g23680D/BnaA09g36160D/BnaA09g42840D/BnaC04g56830D/BnaC08g27680D/BnaC08g35360D	6
GO:0006120	mitochondrial electron transport, NADH to ubiquinone	10/12729	25/76374	0.00473566	0.0141748	0.00856251	BnaA02g34960D/BnaA03g03560D/BnaA03g26110D/BnaA09g00900D/BnaA10g20810D/BnaC02g27030D/BnaC03g05050D/BnaC03g30840D/BnaC09g00030D/BnaC09g44810D	10
GO:0005856	cytoskeleton	25/12729	89/76374	0.00475861	0.0142193	0.00858939	BnaA01g19850D/BnaA02g00190D/BnaA02g07080D/BnaA03g09510D/BnaA03g55890D/BnaA04g24300D/BnaA05g26910D/BnaA06g18020D/BnaA06g20460D/BnaA07g00230D/BnaA09g09810D/BnaA10g12390D/BnaA10g22340D/BnaAnng37000D/BnaC02g00690D/BnaC02g10000D/BnaC03g03940D/BnaC03g12030D/BnaC03g55960D/BnaC03g75050D/BnaC05g34300D/BnaC05g40980D/BnaC06g08720D/BnaC09g34680D/BnaC09g46850D	25
GO:0003950	NAD+ ADP-ribosyltransferase activity	14/12729	41/76374	0.00497568	0.0148427	0.00896598	BnaA02g36520D/BnaA03g26210D/BnaA05g11420D/BnaA08g06940D/BnaA10g13870D/BnaAnng41190D/BnaC02g27380D/BnaC03g30970D/BnaC04g13660D/BnaC05g24350D/BnaC05g28860D/BnaC09g36510D/BnaCnng35930D/BnaCnng53220D	14
GO:0003747	translation release factor activity	8/12729	18/76374	0.00533304	0.0158818	0.00959369	BnaA06g07770D/BnaA06g12300D/BnaA08g22800D/BnaA09g44720D/BnaAnng07970D/BnaC05g13930D/BnaC08g17710D/BnaC08g37420D	8
GO:0003917	DNA topoisomerase type I (single strand cut, ATP-independent) activity	9/12729	22/76374	0.00612346	0.0181742	0.0109784	BnaA01g15830D/BnaA02g09130D/BnaA02g09140D/BnaA10g09510D/BnaC01g18920D/BnaC02g13160D/BnaC02g13170D/BnaC09g31620D/BnaC09g32540D	9
GO:0008508	bile acid:sodium symporter activity	9/12729	22/76374	0.00612346	0.0181742	0.0109784	BnaA03g24950D/BnaA03g45590D/BnaA09g21160D/BnaA09g21170D/BnaC03g73000D/BnaC07g37630D/BnaC07g37650D/BnaC09g23540D/BnaC09g23550D	9
GO:0009788	negative regulation of abscisic acid-activated signaling pathway	38/12729	153/76374	0.00634402	0.0187971	0.0113547	BnaA01g15250D/BnaA01g18430D/BnaA01g20940D/BnaA01g23280D/BnaA01g37370D/BnaA03g08150D/BnaA03g27740D/BnaA03g47830D/BnaA05g02100D/BnaA05g12650D/BnaA05g27660D/BnaA05g37500D/BnaA06g07490D/BnaA07g36010D/BnaA08g14490D/BnaA09g18720D/BnaA09g49440D/BnaA10g04840D/BnaA10g11080D/BnaA10g12140D/BnaAnng23920D/BnaC01g18020D/BnaC01g41870D/BnaC03g10350D/BnaC03g32780D/BnaC04g14090D/BnaC05g05180D/BnaC05g07480D/BnaC05g…	38
GO:0006352	DNA-templated transcription, initiation	28/12729	105/76374	0.00644466	0.0190632	0.0115154	BnaA01g05110D/BnaA03g15750D/BnaA03g19530D/BnaA03g31150D/BnaA03g41160D/BnaA03g41170D/BnaA03g55430D/BnaA04g02470D/BnaA05g02290D/BnaA08g12390D/BnaA08g28140D/BnaA09g36630D/BnaA09g54650D/BnaA10g03090D/BnaC01g06760D/BnaC02g01100D/BnaC03g23420D/BnaC03g36480D/BnaC03g67470D/BnaC04g01970D/BnaC04g24310D/BnaC05g02960D/BnaC06g41680D/BnaC07g32070D/BnaC08g01080D/BnaC08g28210D/BnaCnng37990D/BnaUnng04360D	28
GO:0008934	inositol monophosphate 1-phosphatase activity	7/12729	15/76374	0.0065982	0.019452	0.0117503	BnaA02g34000D/BnaA06g23130D/BnaA06g23140D/BnaC02g42850D/BnaC02g42860D/BnaC03g50260D/BnaC03g50270D	7
GO:0031204	posttranslational protein targeting to membrane, translocation	7/12729	15/76374	0.0065982	0.019452	0.0117503	BnaA01g11090D/BnaA07g19730D/BnaC01g12590D/BnaC02g43860D/BnaC05g11000D/BnaC05g11010D/BnaC06g18990D	7
GO:0006259	DNA metabolic process	21/12729	73/76374	0.00685423	0.0201393	0.0121655	BnaA02g09650D/BnaA02g36100D/BnaA04g17830D/BnaA06g38570D/BnaA07g11150D/BnaA07g11160D/BnaA08g10440D/BnaA08g10450D/BnaC02g25790D/BnaC03g23660D/BnaC04g41420D/BnaC05g04580D/BnaC05g16250D/BnaC05g32260D/BnaC05g45270D/BnaC07g15030D/BnaC07g15040D/BnaCnng23150D/BnaCnng35840D/BnaCnng16650D/BnaCnng16670D	21
GO:0031507	heterochromatin assembly	21/12729	73/76374	0.00685423	0.0201393	0.0121655	BnaA01g25700D/BnaA02g07770D/BnaA03g09860D/BnaA03g35550D/BnaA03g58630D/BnaA05g19140D/BnaA05g22000D/BnaA06g02830D/BnaA10g21580D/BnaA10g29210D/BnaAnng11080D/BnaAnng27360D/BnaC01g28980D/BnaC02g10840D/BnaC03g12490D/BnaC03g41330D/BnaC05g32520D/BnaC05g49460D/BnaC06g03610D/BnaC09g33680D/BnaCnng18960D	21
GO:0001522	pseudouridine synthesis	18/12729	60/76374	0.00741663	0.0217554	0.0131417	BnaA02g04000D/BnaA02g21770D/BnaA03g06930D/BnaA07g00340D/BnaA07g17200D/BnaA08g27470D/BnaA09g10290D/BnaA09g43720D/BnaA09g56020D/BnaA10g19290D/BnaC02g48350D/BnaC02g46780D/BnaC07g00380D/BnaC08g46290D/BnaC09g10460D/BnaC09g43050D/BnaCnng43190D/BnaCnng07570D	18
GO:0005744	TIM23 mitochondrial import inner membrane translocase complex	23/12729	83/76374	0.00785771	0.0226656	0.0136916	BnaA01g15780D/BnaA03g03460D/BnaA03g17200D/BnaA05g07100D/BnaA05g13510D/BnaA06g11810D/BnaA07g08810D/BnaA08g00200D/BnaA08g19020D/BnaA08g21850D/BnaA08g23060D/BnaA09g27920D/BnaC01g18840D/BnaC03g04950D/BnaC03g57640D/BnaC03g70910D/BnaC04g07900D/BnaC05g13650D/BnaC05g21320D/BnaC06g11160D/BnaC07g11430D/BnaC08g17420D/BnaCnng48140D	23
GO:0001944	vasculature development	8/12729	19/76374	0.00788101	0.0226656	0.0136916	BnaA06g05440D/BnaA08g26320D/BnaA09g48440D/BnaA10g21170D/BnaC08g42690D/BnaC09g45350D/BnaCnng06970D/BnaCnng19930D	8
GO:0007049	cell cycle	8/12729	19/76374	0.00788101	0.0226656	0.0136916	BnaA06g04050D/BnaA09g38000D/BnaA09g38010D/BnaC01g16100D/BnaC02g00100D/BnaC06g17560D/BnaC08g29980D/BnaC09g45630D	8
GO:0010628	positive regulation of gene expression	8/12729	19/76374	0.00788101	0.0226656	0.0136916	BnaA05g15240D/BnaA06g02320D/BnaA08g01960D/BnaC03g77820D/BnaC05g00070D/BnaC06g04600D/BnaC06g08860D/BnaCnng09170D	8
GO:0046608	carotenoid isomerase activity	8/12729	19/76374	0.00788101	0.0226656	0.0136916	BnaA03g18380D/BnaA03g18390D/BnaA04g12350D/BnaAnng35580D/BnaC03g21900D/BnaC07g08560D/BnaC08g49360D/BnaUnng05060D	8
GO:0004776	succinate-CoA ligase (GDP-forming) activity	6/12729	12/76374	0.00792009	0.0226656	0.0136916	BnaA03g39510D/BnaA07g00290D/BnaA09g11210D/BnaC07g00480D/BnaC07g49680D/BnaC09g11540D	6
GO:0005483	soluble NSF attachment protein activity	6/12729	12/76374	0.00792009	0.0226656	0.0136916	BnaA02g14320D/BnaA07g09410D/BnaC02g19220D/BnaC05g40940D/BnaC06g20330D/BnaC07g12350D	6
GO:0006278	RNA-dependent DNA biosynthetic process	6/12729	12/76374	0.00792009	0.0226656	0.0136916	BnaA08g01940D/BnaA09g05750D/BnaAnng15960D/BnaC02g07390D/BnaC03g77850D/BnaCnng12820D	6
GO:0008444	CDP-diacylglycerol-glycerol-3-phosphate 3-phosphatidyltransferase activity	6/12729	12/76374	0.00792009	0.0226656	0.0136916	BnaA03g18520D/BnaA04g23190D/BnaA07g07240D/BnaC03g22010D/BnaC04g16500D/BnaC04g46200D	6
GO:0010086	embryonic root morphogenesis	6/12729	12/76374	0.00792009	0.0226656	0.0136916	BnaA07g22200D/BnaA07g31610D/BnaAnng30830D/BnaC06g22930D/BnaC06g22940D/BnaC06g35430D	6
GO:0015217	ADP transmembrane transporter activity	6/12729	12/76374	0.00792009	0.0226656	0.0136916	BnaA03g26840D/BnaA09g00180D/BnaC02g27730D/BnaC03g31790D/BnaCnng52820D/BnaCnng01900D	6
GO:0015866	ADP transport	6/12729	12/76374	0.00792009	0.0226656	0.0136916	BnaA03g26840D/BnaA09g00180D/BnaC02g27730D/BnaC03g31790D/BnaCnng52820D/BnaCnng01900D	6
GO:0031407	oxylipin metabolic process	6/12729	12/76374	0.00792009	0.0226656	0.0136916	BnaA03g15390D/BnaA04g19410D/BnaA05g10200D/BnaC03g18600D/BnaC04g11110D/BnaC04g43780D	6
GO:0052658	inositol-1,4,5-trisphosphate 5-phosphatase activity	6/12729	12/76374	0.00792009	0.0226656	0.0136916	BnaA08g28320D/BnaA09g50250D/BnaA10g03830D/BnaC05g03750D/BnaC08g01360D/BnaC08g44370D	6
GO:0071446	cellular response to salicylic acid stimulus	6/12729	12/76374	0.00792009	0.0226656	0.0136916	BnaA05g33880D/BnaA06g06290D/BnaC05g46590D/BnaC05g48800D/BnaC07g01030D/BnaCnng77750D	6
GO:0008235	metalloexopeptidase activity	14/12729	43/76374	0.00798061	0.0228017	0.0137738	BnaA01g19300D/BnaA02g17790D/BnaA03g41480D/BnaA04g01450D/BnaA07g18610D/BnaA09g32360D/BnaA09g38240D/BnaC01g23260D/BnaC04g22540D/BnaC06g17640D/BnaC07g32530D/BnaC08g23130D/BnaC08g30210D/BnaCnng31070D	14
GO:0004556	alpha-amylase activity	9/12729	23/76374	0.0085925	0.0244705	0.0147818	BnaA01g19130D/BnaA05g36120D/BnaA07g28350D/BnaA07g32360D/BnaC01g16860D/BnaC01g22960D/BnaC05g31620D/BnaC06g30880D/BnaC06g36810D	9
GO:0008559	ATPase-coupled xenobiotic transmembrane transporter activity	9/12729	23/76374	0.0085925	0.0244705	0.0147818	BnaA03g43560D/BnaA04g26870D/BnaA08g17370D/BnaA09g26130D/BnaC03g59700D/BnaC04g00490D/BnaC04g51510D/BnaC05g23280D/BnaC07g35040D	9
GO:0004721	phosphoprotein phosphatase activity	16/12729	52/76374	0.0086587	0.0246193	0.0148717	BnaA01g17880D/BnaA01g17890D/BnaA02g23000D/BnaA03g42970D/BnaA06g35850D/BnaA07g22500D/BnaA07g38950D/BnaA08g09980D/BnaA09g16170D/BnaC01g21150D/BnaC02g29720D/BnaC03g30380D/BnaC06g23390D/BnaC06g34660D/BnaC07g01640D/BnaC07g19610D	16
GO:0009308	amine metabolic process	12/12729	35/76374	0.00870077	0.024699	0.0149198	BnaA03g18810D/BnaA03g54760D/BnaA06g21880D/BnaA09g06080D/BnaA09g10720D/BnaAnng24490D/BnaC03g72290D/BnaC04g20180D/BnaC09g05640D/BnaC09g51200D/BnaCnng45980D/BnaCnng59660D	12
GO:0005198	structural molecule activity	48/12729	206/76374	0.00873934	0.0247685	0.0149618	BnaA01g05610D/BnaA01g11310D/BnaA01g12060D/BnaA01g15100D/BnaA03g23310D/BnaA03g25300D/BnaA03g26440D/BnaA05g10190D/BnaA05g19960D/BnaA06g02380D/BnaA06g40470D/BnaA06g40490D/BnaA06g40500D/BnaA06g40510D/BnaA08g09730D/BnaA08g16450D/BnaA09g20620D/BnaA09g43220D/BnaA10g05560D/BnaC01g00490D/BnaC01g12750D/BnaC01g13750D/BnaC01g14550D/BnaC01g17830D/BnaC03g27550D/BnaC03g29750D/BnaC03g31260D/BnaC03g64150D/BnaC03g…	48
GO:0031048	chromatin silencing by small RNA	96/12729	459/76374	0.00992517	0.0280841	0.0169647	BnaA01g05690D/BnaA01g12740D/BnaA01g17510D/BnaA01g35360D/BnaA02g01360D/BnaA02g17350D/BnaA03g02430D/BnaA03g38430D/BnaA03g45660D/BnaA03g54760D/BnaA04g15560D/BnaA04g26350D/BnaA05g03310D/BnaA05g06130D/BnaA05g07810D/BnaA06g07690D/BnaA06g12580D/BnaA06g15430D/BnaA06g17730D/BnaA07g07810D/BnaA07g13010D/BnaA07g21450D/BnaA07g32610D/BnaA07g37430D/BnaA08g16340D/BnaA08g21210D/BnaA08g21740D/BnaA08g22640D/BnaA09g…	96
GO:0006370	7-methylguanosine mRNA capping	7/12729	16/76374	0.0100611	0.0281966	0.0170326	BnaA03g00430D/BnaA03g49230D/BnaA05g29240D/BnaA06g29090D/BnaC03g00320D/BnaC07g49450D/BnaCnng24280D	7
GO:0010160	formation of animal organ boundary	7/12729	16/76374	0.0100611	0.0281966	0.0170326	BnaA02g29470D/BnaA06g31250D/BnaA09g02390D/BnaC02g37560D/BnaC02g37570D/BnaC09g01920D/BnaCnng45670D	7
GO:0071329	cellular response to sucrose stimulus	7/12729	16/76374	0.0100611	0.0281966	0.0170326	BnaA04g16310D/BnaA06g05150D/BnaA09g48720D/BnaC03g51730D/BnaC04g39580D/BnaC05g06430D/BnaC08g42970D	7
GO:0080026	response to indolebutyric acid	7/12729	16/76374	0.0100611	0.0281966	0.0170326	BnaA04g26650D/BnaA05g05340D/BnaC03g25570D/BnaC03g25580D/BnaC03g25590D/BnaC04g04740D/BnaC04g50710D	7
GO:1900140	regulation of seedling development	7/12729	16/76374	0.0100611	0.0281966	0.0170326	BnaA01g05490D/BnaA06g40640D/BnaA08g16520D/BnaC01g40650D/BnaC01g40660D/BnaC03g60590D/BnaC07g47240D	7
GO:2001006	regulation of cellulose biosynthetic process	7/12729	16/76374	0.0100611	0.0281966	0.0170326	BnaA04g22570D/BnaA08g17480D/BnaA09g26340D/BnaA09g26350D/BnaC07g09120D/BnaCnng34540D/BnaCnng17800D	7
GO:0009705	plant-type vacuole membrane	78/12729	364/76374	0.0104449	0.0292258	0.0176543	BnaA01g15140D/BnaA01g19370D/BnaA01g19420D/BnaA01g19430D/BnaA02g03350D/BnaA02g03440D/BnaA02g26150D/BnaA02g35880D/BnaA02g35430D/BnaA03g11120D/BnaA03g28200D/BnaA04g21850D/BnaA04g25030D/BnaA05g03260D/BnaA05g06490D/BnaA05g32340D/BnaA06g05200D/BnaA06g10340D/BnaA06g13580D/BnaA06g13670D/BnaA06g14680D/BnaA06g38620D/BnaA07g21790D/BnaA07g31980D/BnaA07g35600D/BnaA08g10550D/BnaA08g21610D/BnaA08g23780D/BnaA08g…	78
GO:0004028	3-chloroallyl aldehyde dehydrogenase activity	16/12729	53/76374	0.0105229	0.0293972	0.0177579	BnaA03g50730D/BnaA06g16950D/BnaA06g20750D/BnaA07g21990D/BnaA07g31850D/BnaA07g34930D/BnaA08g04430D/BnaA10g08800D/BnaA10g08810D/BnaC03g53360D/BnaC05g25340D/BnaC06g22720D/BnaC06g39860D/BnaC08g05150D/BnaCnng49760D/BnaCnng12150D	16
GO:0051707	response to other organism	42/12729	178/76374	0.0108469	0.0302545	0.0182758	BnaA02g16520D/BnaA02g17480D/BnaA03g13720D/BnaA03g15010D/BnaA03g23420D/BnaA03g40840D/BnaA04g17280D/BnaA05g09460D/BnaA05g12250D/BnaA06g12250D/BnaA06g17570D/BnaA06g20790D/BnaA07g06710D/BnaA07g22570D/BnaA07g32100D/BnaA07g38980D/BnaA09g44930D/BnaA09g50470D/BnaAnng12430D/BnaC01g13960D/BnaC01g25090D/BnaC02g09350D/BnaC02g12250D/BnaC02g22330D/BnaC02g22770D/BnaC02g23440D/BnaC02g45840D/BnaC03g16630D/BnaC03g…	42
GO:0010325	raffinose family oligosaccharide biosynthetic process	12/12729	36/76374	0.0111088	0.0309358	0.0186873	BnaA05g32630D/BnaA05g32640D/BnaA08g00340D/BnaA09g28260D/BnaA10g17240D/BnaC03g70760D/BnaC03g70770D/BnaC05g47760D/BnaC05g47770D/BnaC09g40420D/BnaCnng68300D/BnaCnng28010D	12
GO:0010329	auxin efflux transmembrane transporter activity	21/12729	76/76374	0.0111285	0.0309417	0.0186909	BnaA02g29470D/BnaA03g16880D/BnaA03g18520D/BnaA04g21150D/BnaA04g23190D/BnaA04g26870D/BnaA06g31250D/BnaA07g07240D/BnaA07g19210D/BnaA09g02390D/BnaC02g37560D/BnaC02g37570D/BnaC03g20400D/BnaC03g22010D/BnaC04g00490D/BnaC04g16500D/BnaC04g46200D/BnaC04g51510D/BnaC06g18370D/BnaC09g01920D/BnaCnng45670D	21
GO:0009662	etioplast organization	8/12729	20/76374	0.0112432	0.0312113	0.0188537	BnaA03g18380D/BnaA03g18390D/BnaA04g12350D/BnaAnng35580D/BnaC03g21900D/BnaC07g08560D/BnaC08g49360D/BnaUnng05060D	8
GO:0006399	tRNA metabolic process	30/12729	119/76374	0.0113897	0.0315683	0.0190694	BnaA01g29950D/BnaA02g25120D/BnaA03g13610D/BnaA03g24130D/BnaA04g17180D/BnaA04g17760D/BnaA05g30550D/BnaA08g16560D/BnaA09g22860D/BnaA10g04620D/BnaA10g27250D/BnaAnng05810D/BnaC01g37850D/BnaC02g30690D/BnaC03g28720D/BnaC03g60540D/BnaC03g71910D/BnaC04g40780D/BnaC05g04970D/BnaC05g20910D/BnaC05g45010D/BnaC06g22100D/BnaC06g36140D/BnaC07g06720D/BnaC07g18690D/BnaCnng75700D/BnaCnng03580D/BnaCnng78700D/BnaCnng…	30
GO:0042800	histone methyltransferase activity (H3-K4 specific)	9/12729	24/76374	0.0117476	0.0325092	0.0196377	BnaA01g05410D/BnaA05g28760D/BnaA07g33460D/BnaA08g16610D/BnaC01g00280D/BnaC02g23610D/BnaC03g60490D/BnaC05g43230D/BnaC06g38010D	9
GO:0009961	response to 1-aminocyclopropane-1-carboxylic acid	10/12729	28/76374	0.0117962	0.0325922	0.0196879	BnaA01g22590D/BnaA06g06950D/BnaA09g15880D/BnaAnng39710D/BnaC01g29450D/BnaC05g08600D/BnaC08g18030D/BnaC09g16680D/BnaCnng09960D/BnaCnng04130D	10
GO:0052544	defense response by callose deposition in cell wall	29/12729	115/76374	0.0126302	0.0346936	0.0209573	BnaA01g28090D/BnaA02g24450D/BnaA03g41260D/BnaA05g23360D/BnaA06g09880D/BnaA06g12690D/BnaA06g12700D/BnaA07g19610D/BnaA07g31220D/BnaA08g22580D/BnaA08g31540D/BnaA09g17950D/BnaA09g31830D/BnaA09g44500D/BnaC02g32260D/BnaC05g11500D/BnaC05g14250D/BnaC05g37000D/BnaC06g34910D/BnaC07g32150D/BnaC08g16540D/BnaC08g18080D/BnaC08g18090D/BnaC08g22660D/BnaC08g37160D/BnaC09g08220D/BnaC09g19310D/BnaCnng60340D/BnaCnng…	29
GO:0000076	DNA replication checkpoint	6/12729	13/76374	0.0126553	0.0346936	0.0209573	BnaA07g10820D/BnaA08g27310D/BnaA09g51090D/BnaC05g18280D/BnaC08g00110D/BnaC08g45910D	6
GO:0003964	RNA-directed DNA polymerase activity	6/12729	13/76374	0.0126553	0.0346936	0.0209573	BnaA08g01940D/BnaA09g05750D/BnaAnng15960D/BnaC02g07390D/BnaC03g77850D/BnaCnng12820D	6
GO:0004673	protein histidine kinase activity	6/12729	13/76374	0.0126553	0.0346936	0.0209573	BnaA06g23200D/BnaA08g17280D/BnaC03g50160D/BnaC03g59780D/BnaC04g28800D/BnaCnng17230D	6
GO:0010338	leaf formation	6/12729	13/76374	0.0126553	0.0346936	0.0209573	BnaA03g17330D/BnaA05g06890D/BnaA06g18830D/BnaC03g20830D/BnaC03g54740D/BnaC04g07760D	6
GO:0016226	iron-sulfur cluster assembly	84/12729	399/76374	0.0127435	0.0348811	0.0210705	BnaA01g14120D/BnaA01g15100D/BnaA01g30190D/BnaA03g13610D/BnaA03g23310D/BnaA03g25380D/BnaA03g25410D/BnaA03g26440D/BnaA03g32860D/BnaA03g36860D/BnaA03g41710D/BnaA03g41760D/BnaA03g46910D/BnaA03g53020D/BnaA04g05490D/BnaA04g17180D/BnaA04g17760D/BnaA04g29490D/BnaA05g16830D/BnaA05g19960D/BnaA05g25810D/BnaA05g26270D/BnaA05g30550D/BnaA06g02380D/BnaA06g35530D/BnaA08g00110D/BnaA08g03490D/BnaA08g08360D/BnaA08g…	84
GO:0009755	hormone-mediated signaling pathway	33/12729	135/76374	0.0131952	0.0360614	0.0217835	BnaA01g27690D/BnaA01g34630D/BnaA02g24890D/BnaA02g30960D/BnaA03g32060D/BnaA03g42250D/BnaA03g55340D/BnaA04g04810D/BnaA05g27130D/BnaA06g12250D/BnaA09g33680D/BnaA09g36280D/BnaAnng28020D/BnaC01g00780D/BnaC01g22210D/BnaC01g35220D/BnaC02g33040D/BnaC02g39260D/BnaC03g02560D/BnaC03g37340D/BnaC03g53900D/BnaC04g27330D/BnaC05g41260D/BnaC06g43780D/BnaC07g33310D/BnaC07g33960D/BnaC08g11150D/BnaC08g27840D/BnaC09g…	33
GO:0009926	auxin polar transport	71/12729	332/76374	0.0145882	0.0398066	0.0240459	BnaA02g02080D/BnaA02g30490D/BnaA03g01690D/BnaA03g08040D/BnaA03g39630D/BnaA03g40550D/BnaA03g54310D/BnaA05g30530D/BnaA05g33630D/BnaA06g03850D/BnaA06g10340D/BnaA06g24650D/BnaA06g38620D/BnaA07g08390D/BnaA07g34200D/BnaA07g35600D/BnaA07g37150D/BnaA08g03320D/BnaA08g09070D/BnaA08g18230D/BnaA08g18290D/BnaA08g19440D/BnaA08g23780D/BnaA08g28010D/BnaA09g03190D/BnaA09g05440D/BnaA09g27240D/BnaA09g28590D/BnaA09g…	71
GO:0004048	anthranilate phosphoribosyltransferase activity	7/12729	17/76374	0.0146785	0.039991	0.0241572	BnaA06g30410D/BnaA09g02850D/BnaAnng36390D/BnaC02g38370D/BnaC07g49170D/BnaC09g02250D/BnaC09g02270D	7
GO:0004029	aldehyde dehydrogenase (NAD+) activity	11/12729	33/76374	0.0147644	0.0401628	0.024261	BnaA03g50730D/BnaA06g16950D/BnaA06g20750D/BnaA08g04430D/BnaA10g08800D/BnaA10g08810D/BnaC03g53360D/BnaC05g25340D/BnaC08g05150D/BnaCnng49760D/BnaCnng12150D	11
GO:2000377	regulation of reactive oxygen species metabolic process	14/12729	46/76374	0.0149877	0.0406955	0.0245828	BnaA05g32630D/BnaA05g32640D/BnaA08g06940D/BnaA10g17240D/BnaC05g24350D/BnaC05g28860D/BnaC05g47760D/BnaC05g47770D/BnaC09g40420D/BnaCnng68300D/BnaCnng28010D/BnaCnng35930D/BnaCnng35940D/BnaCnng53220D	14
GO:0045787	positive regulation of cell cycle	21/12729	78/76374	0.0150065	0.0406955	0.0245828	BnaA01g25700D/BnaA02g07770D/BnaA03g09860D/BnaA03g35550D/BnaA03g58630D/BnaA05g19140D/BnaA05g22000D/BnaA06g02830D/BnaA10g21580D/BnaA10g29210D/BnaAnng11080D/BnaAnng27360D/BnaC01g28980D/BnaC02g10840D/BnaC03g12490D/BnaC03g41330D/BnaC05g32520D/BnaC05g49460D/BnaC06g03610D/BnaC09g33680D/BnaCnng18960D	21
GO:0010220	positive regulation of vernalization response	5/12729	10/76374	0.0154556	0.0417846	0.0252407	BnaA03g51290D/BnaA08g12690D/BnaC01g07310D/BnaC01g14560D/BnaC03g77370D	5
GO:0019204	obsolete nucleotide phosphatase activity	5/12729	10/76374	0.0154556	0.0417846	0.0252407	BnaA01g11500D/BnaA03g44810D/BnaA08g09620D/BnaC03g64030D/BnaC07g36800D	5
GO:0031490	chromatin DNA binding	8/12729	21/76374	0.0155539	0.041986	0.0253624	BnaA01g15830D/BnaA02g09130D/BnaA02g09140D/BnaA10g09510D/BnaC01g18920D/BnaC02g13160D/BnaC02g13170D/BnaC09g31620D	8
GO:0008106	alcohol dehydrogenase (NADP+) activity	9/12729	25/76374	0.0156919	0.0422936	0.0255482	BnaA03g17400D/BnaA03g17410D/BnaA05g06810D/BnaA05g34870D/BnaC03g72040D/BnaC03g72060D/BnaC04g53500D/BnaC04g53530D/BnaC04g53540D	9
GO:0017025	TBP-class protein binding	12/12729	38/76374	0.017426	0.0468956	0.0283281	BnaA03g19530D/BnaA03g31150D/BnaA03g55460D/BnaA05g02290D/BnaA05g13730D/BnaA08g00420D/BnaC03g02670D/BnaC03g23420D/BnaC03g36480D/BnaC03g70590D/BnaC04g01970D/BnaC06g10970D	12
